# Supplementary material for: A genome-wide screen in macrophages identifies PTEN as required for myeloid restriction of Listeria monocytogenes infection
Source: PLoS Pathog. 2023 May 22;19(5):e1011058. doi: 10.1371/journal.ppat.1011058 (PMC10237667; doi:10.1371/journal.ppat.1011058)
Supplement: S1 Table — (XLSX) [file ppat.1011058.s001.xlsx]

## Sheet: Gene Summary
Gene id	MAGeCK score	p-value	Rank	Good sgRNA	Genomic position		Legend:
Usp22	2.2481e-08	2.5165e-07	1	4	61166769		Gene id = gene name in Mus musculus
Taf4a	3.5105e-08	2.5165e-07	2	4	179938431		MAGeCK score = RRA value of the gene in positive selection
Supt20	4.1211e-08	2.5165e-07	3	3	54701567		p-value = significance of the gene in positive selection
Taf13	4.176e-08	2.5165e-07	4	4	108578158		Rank = ranking of the gene in positive selection
Tardbp	5.7223e-08	2.5165e-07	5	3	148619303		Good sgRNA = number of sgRNAs enriched in GFP-negative cell population
Nelfcd	7.8295e-08	2.5165e-07	6	4	174423074		Genomic position = nucleotide position of gene in genome
Rfwd2	2.0273e-07	7.5496e-07	7	4	159249266
Dyrk1a	2.6506e-07	1.2583e-06	8	4	94659689
Brd4	7.058e-07	2.2649e-06	9	3	32229500
Rragc	1.7588e-06	5.788e-06	10	3	123920961
Nelfa	3.1111e-06	1.1828e-05	11	3	33936130
Gsk3a	6.4108e-06	2.441e-05	12	4	25235707
Abce1	1.1044e-05	4.1019e-05	13	3	79701877
Taf2	1.2522e-05	5.1085e-05	14	3	55062270
Eif3h	1.3902e-05	5.5615e-05	15	4	51842495
Taf10	1.6407e-05	6.5681e-05	16	3	105743916
Zc3h10	1.6524e-05	6.6688e-05	17	3	128544822
Taf6l	1.8668e-05	7.4741e-05	18	4	8783361
Ccar1	2.4598e-05	0.00010142	19	3	62770903
Pcdhga8	2.5502e-05	0.00010293	20	1	37727380
Taf8	2.8845e-05	0.00011601	21	4	47498564
Kcnk16	3.5126e-05	0.00013866	22	3	20264249
Ino80	3.9082e-05	0.000153	23	3	119442472
Atxn7l3	4.2663e-05	0.00016785	24	3	102294139
Ptbp1	4.27e-05	0.00016785	25	4	79859183
Mau2	4.3959e-05	0.00017188	26	4	70042485
Cebpb	4.64e-05	0.00018144	27	2	167689334
Tada2b	5.2118e-05	0.00020459	28	3	36476617
Nelfb	5.3886e-05	0.00021214	29	3	25210807
Eif4g2	6.3293e-05	0.00025442	30	3	111076333
Morc3	7.4766e-05	0.00030324	31	3	93853136
Gsk3b	7.8026e-05	0.00031532	32	4	38170715
Cnga4	7.9129e-05	0.00031834	33	3	105405625
Pagr1a	8.8807e-05	0.00035307	34	3	127016480
Plekhb2	9.2995e-05	0.00036942	35	4	34863140
Drosha	9.7807e-05	0.00039333	36	3	12834616
Arf1	0.00010151	0.00040692	37	4	59213248
Pcyt2	0.00010596	0.00042051	38	2	120615869
Erh	0.00011048	0.00043561	39	3	80637499
Ankrd52	0.00011483	0.00045272	40	4	128386434
Ifi205	0.00011769	0.00046329	41	4	174028327
Stxbp3a	0.00012475	0.00049299	42	4	108805254
Cdkn1a	0.00013019	0.00051664	43	3	29098565
Prdm13	0.00016146	0.00063441	44	4	21679071
Ikbkg	0.00017045	0.0006621	45	2	74437274
Spi1	0.00022246	0.00085335	46	3	91113411
Prss42	0.00022545	0.00086191	47	4	110799416
Dscaml1	0.0002295	0.00087952	48	1	45717511
Ccdc60	0.00025	0.00094495	49	4	116146123
Actr8	0.00025895	0.00097817	50	3	29982669
Smg6	0.00026736	0.0010074	51	4	74929992
Vmn1r53	0.00027036	0.0010169	52	4	90223865
Ipo13	0.00027155	0.0010194	53	4	117903946
Egr1	0.00027968	0.0010517	54	4	34862643
Ambra1	0.00028049	0.0010537	55	3	91772987
Kdm3b	0.00028601	0.0010718	56	3	34808518
Gm6484	0.0003062	0.0011473	57	4	21835783
Ggct	0.00030897	0.0011584	58	3	54992774
Ric8	0.00033359	0.0012404	59	4	140857550
Spin1	0.00033796	0.0012535	60	4	51139600
Irak4	0.00033821	0.0012547	61	4	94547968
Olfr1030	0.00034089	0.0012661	62	4	85984344
Pced1b	0.00034817	0.0012892	63	4	97384311
Tcf7	0.00035748	0.0013275	64	3	52260543
Gtf2h5	0.00037843	0.001408	65	4	6084521
Tada1	0.00038247	0.0014231	66	4	166389864
Fan1	0.0003861	0.0014322	67	4	64372496
Tars2	0.00042485	0.0015655	68	4	95750741
Hes6	0.00042697	0.0015751	69	4	91412761
Ly6g5c	0.00043016	0.0015872	70	3	35110737
Nfrkb	0.00043346	0.0015977	71	2	31392108
Atp2b1	0.00044262	0.0016315	72	3	99003341
Trp53	0.00046515	0.0017261	73	3	69587384
Dhx15	0.00046978	0.0017447	74	4	52171534
Olfr491	0.00047517	0.0017653	75	3	108317446
Acly	0.00047569	0.0017668	76	3	100522049
Glis1	0.00047906	0.0017769	77	2	107615129
Uvssa	0.0004838	0.0017965	78	2	33389762
Taf5l	0.00048445	0.0017981	79	2	123998066
Lrrc16b	0.00051692	0.0019133	80	3	55495487
Capns1	0.00052159	0.0019304	81	4	30192584
Camp	0.00052298	0.001936	82	3	109848643
Supt7l	0.00055547	0.0020502	83	3	31522993
Cysltr1	0.00057824	0.0021484	84	4	106578600
Hemk1	0.00058534	0.002166	85	3	107337030
Spock2	0.00058641	0.002169	86	2	60125789
Psme4	0.00058741	0.0021725	87	3	30807821
Ptges3l	0.000588	0.0021755	88	4	101424164
Clp1	0.00060121	0.0022223	89	4	84725747
Nelfe	0.00061112	0.0022581	90	3	34854117
Usp5	0.00063358	0.0023381	91	3	124821887
Dad1	0.00068837	0.0025299	92	3	54253734
Lamp2	0.00071425	0.0026285	93	4	38431996
Krtap5-1	0.0007622	0.0027901	94	4	142296932
Gpr82	0.00077551	0.0028374	95	4	13665744
Mrpl17	0.00079032	0.0028842	96	1	105810858
Aak1	0.00079239	0.0028887	97	3	86935439
Tsc2	0.00079308	0.0028912	98	4	24607766
Lrrc74b	0.00080837	0.0029406	99	4	17559756
Olfr1215	0.00082778	0.003007	100	2	89002160
Rnf138rt1	0.0008331	0.0030266	101	3	163760584
Gm2863	0.00083862	0.0030483	102	4	33313909
Mafg	0.00084124	0.0030593	103	3	120629564
Uchl5	0.00084129	0.0030593	104	2	143794790
Plekha4	0.00084732	0.003085	105	4	45538316
Sod1	0.00084914	0.00309	106	3	90222872
Upf3b	0.00085072	0.0030931	107	3	37104438
Runx1	0.00086339	0.0031389	108	4	92695578
Myo19	0.00087579	0.0031887	109	4	84892157
Taf3	0.00089226	0.0032461	110	1	10042445
Chaf1b	0.00090351	0.0032742	111	4	93900083
Yipf5	0.00091459	0.003313	112	4	40212050
Oxsr1	0.00091669	0.003319	113	2	119284597
Hdgfl1	0.00091835	0.0033256	114	4	26770008
Rps16	0.00094323	0.0034137	115	1	28350999
Kat7	0.00096588	0.0035002	116	3	95284107
Cd3e	0.00099062	0.0035878	117	4	45002324
C330007P06Rik	0.0009942	0.0035989	118	2	36864084
Ppil6	0.001009	0.0036532	119	3	41498430
Synpr	0.001012	0.0036623	120	2	13563101
Thoc2	0.0010198	0.003691	121	4	41839627
Sox10	0.0010304	0.0037292	122	4	79156477
Ferd3l	0.0010424	0.0037745	123	3	33928530
Taf5	0.0010452	0.0037881	124	2	47074855
Ptgr2	0.0010455	0.0037891	125	3	84298024
Ccdc101	0.0010723	0.0038908	126	3	126671645
Psmd12	0.0010899	0.0039557	127	3	107486498
Rbm17	0.0011428	0.004144	128	2	11590756
Polr3b	0.0011587	0.0041998	129	3	84632511
Rhbdf2	0.00116	0.0042069	130	4	116605018
Homer1	0.0011671	0.0042285	131	4	93349248
Wasf2	0.0011837	0.0042889	132	3	133192190
Unc13b	0.0011973	0.0043372	133	2	43235400
Senp5	0.0012165	0.0044032	134	2	31989544
Pggt1b	0.0012208	0.0044188	135	2	46259730
Fubp3	0.0012269	0.0044389	136	4	31592475
Tet1	0.0012282	0.0044449	137	4	62839154
Xpo5	0.001249	0.0045129	138	3	46214635
Sftpa1	0.00125	0.0045169	139	4	41134099
Gpr19	0.0012527	0.0045255	140	4	134870012
Ap1m1	0.0012659	0.0045743	141	3	72246661
Gpaa1	0.0013378	0.0048209	142	3	76333320
Nxf2	0.0013385	0.0048229	143	3	134956452
Ropn1	0.0013427	0.0048345	144	3	34671207
Brk1	0.0013484	0.0048561	145	4	113604838
Siah1b	0.0013488	0.0048566	146	4	164072007
Cst9	0.0013837	0.0049799	147	3	148835344
Cap1	0.0013848	0.0049825	148	4	122867522
Sumo2	0.0014019	0.0050423	149	1	115534552
Dhrs13	0.0014167	0.0050937	150	3	78034399
Tcp10c	0.0014316	0.0051425	151	4	13364221
Ptpn12	0.0014322	0.005145	152	3	21001283
Ing4	0.0014382	0.0051692	153	3	125047226
Tfpt	0.0014434	0.0051823	154	4	3621104
Tut1	0.0014528	0.005211	155	2	8965232
Atp6v0a4	0.0014529	0.005211	156	4	38082055
Ahdc1	0.0014732	0.0052829	157	2	133062481
Olfr710	0.0014838	0.0053197	158	3	106944497
Olfr324	0.0015177	0.0054505	159	4	58597915
Akr1c18	0.0015239	0.0054752	160	3	4137198
Dscr3	0.0015547	0.0055748	161	1	94526343
Rraga	0.0015698	0.0056307	162	3	86576068
2810474O19Rik	0.0015795	0.0056619	163	3	149325905
Brd2	0.0015879	0.0056936	164	4	34117101
Vmn1r215	0.0016042	0.005754	165	3	23076295
Tas2r122	0.0016087	0.0057691	166	4	132711522
Nkd1	0.0016321	0.0058577	167	2	88585245
Upf2	0.001634	0.0058642	168	3	5961193
Pigh	0.0016503	0.0059146	169	4	79085700
Dgcr8	0.0016566	0.0059342	170	2	18280225
Crebbp	0.0016589	0.0059407	171	4	4093502
Vmn1r212	0.0016878	0.0060409	172	4	22883912
Plat	0.0017025	0.0060958	173	4	22772761
Ppcdc	0.0017075	0.0061094	174	3	57421131
Pou3f2	0.0017213	0.0061587	175	4	22487932
Pde1b	0.0017592	0.0062905	176	3	103525253
Cbfb	0.0018314	0.0065341	177	3	105171314
Larp4b	0.0018628	0.0066504	178	2	9147497
Smad4	0.001876	0.0066972	179	4	73675796
Fem1c	0.0018793	0.0067093	180	4	46524276
U2af1l4	0.0018895	0.0067516	181	4	30564097
3110082J24Rik	0.0019024	0.0067994	182	4	30105155
Trmt10c	0.0019092	0.0068291	183	4	56034874
Cbx1	0.0019185	0.0068568	184	4	96802739
Rela	0.0019239	0.0068804	185	2	5638631
Edc3	0.0019255	0.0068885	186	4	57727377
U2af1	0.0019561	0.0069866	187	2	31648883
Gm5114	0.0019882	0.0071049	188	4	39410740
Col5a2	0.0019915	0.007118	189	4	45436401
Sigirr	0.002058	0.0073656	190	4	141092999
Rpl12	0.002064	0.0073867	191	2	32962117
Hectd1	0.002079	0.0074356	192	4	51802762
Actrt1	0.0021052	0.0075347	193	4	46329337
Tacc2	0.0021183	0.007577	194	3	130625613
Poldip3	0.0021459	0.0076872	195	3	83135295
Cgrrf1	0.0021601	0.0077345	196	4	46832328
Pten	0.002169	0.0077682	197	2	32815476
Galnt1	0.0022192	0.007955	198	3	24246075
Pmvk	0.0022635	0.008113	199	3	89467562
Haus2	0.0022677	0.0081241	200	2	120609521
Tmem53	0.00227	0.0081326	201	3	117268056
Olfr508	0.0022931	0.0082091	202	3	108630382
Plvap	0.0022951	0.0082182	203	3	71508054
Yes1	0.0023041	0.0082544	204	4	32655203
Rgs13	0.0023186	0.0083043	205	1	144140779
A630033H20Rik	0.0023217	0.0083158	206	3	107171445
Taf1d	0.0023972	0.0085796	207	4	15308664
R3hdm1	0.0024018	0.0085932	208	3	128175118
Trip12	0.0024185	0.008647	209	3	84776357
H1fx	0.0024194	0.0086505	210	2	87981091
Pigf	0.0024714	0.0088322	211	3	87020430
Fam217a	0.0024735	0.0088398	212	2	34911069
Stk40	0.0024765	0.0088478	213	3	126135020
Gm20826	0.0024772	0.0088498	214	4	7636725
Olfr652	0.0024856	0.0088856	215	2	104564312
Doc2g	0.0024891	0.0088977	216	3	4004154
Id2	0.0025223	0.0089998	217	2	25095929
Mief1	0.002528	0.0090184	218	4	80249496
Eif5	0.0025755	0.0091715	219	4	111540138
Msra	0.0025936	0.0092414	220	4	64233834
Dhx38	0.0026158	0.0093189	221	3	109559543
Det1	0.0026241	0.0093461	222	3	78843196
Cpne8	0.002675	0.0094986	223	2	90552004
Arhgap30	0.0026784	0.0095107	224	3	171404119
Lamtor4	0.0026834	0.0095268	225	3	138258659
Sf3b3	0.0027014	0.0095902	226	4	110841836
Phc1	0.0027137	0.0096355	227	3	122323324
Bub1b	0.0027146	0.0096385	228	2	118615027
Sptlc1	0.0027241	0.0096662	229	2	53367331
Tmem208	0.0027482	0.0097543	230	4	105327128
Vmn2r35	0.0027527	0.0097737	231	2	7789308
Olfr477	0.0027591	0.0097925	232	3	107990644
Arhgap1	0.0027715	0.0098393	233	4	91662309
Gse1	0.0027747	0.007733	234	3	120569214
Setd5	0.0027928	0.0099118	235	4	113116798	p<0.01
Pnpla1	0.0028277	0.010032	236	2	28876932
Mios	0.0028374	0.01006	237	4	8215519
Cdr1	0.0028468	0.010094	238	4	61185066
Ptpn6	0.0028487	0.010099	239	4	124727405
Spns1	0.0028854	0.010231	240	4	126376894
Bag4	0.0029043	0.010285	241	2	25777477
Tm2d3	0.0029295	0.010374	242	2	65695326
Asrgl1	0.0029398	0.010416	243	3	9116556
Vdr	0.0029633	0.010489	244	4	97876796
Stab1	0.0029804	0.010544	245	2	31161186
Ankrd63	0.0030001	0.010615	246	3	118702985
Mettl25	0.0030007	0.010619	247	4	105826300
Ei24	0.003013	0.010664	248	2	36788244
Twf2	0.0030178	0.010676	249	4	106212832
Zfp260	0.003021	0.01069	250	4	30105035
Dph2	0.0030313	0.010715	251	2	117890934
Klk1b27	0.003033	0.010719	252	2	44054495
Klf6	0.003053	0.010789	253	2	5864810
Ttc1	0.0030597	0.010809	254	3	43745204
Brd7	0.0030691	0.010835	255	4	88345851
Rab43	0.0030948	0.01093	256	3	87794669
Ostf1	0.0031111	0.010986	257	4	18590412
Rpap3	0.003133	0.011063	258	2	97683840
Acad11	0.0031468	0.011113	259	4	104081285
Olfr1093	0.0031516	0.011132	260	3	86786185
Uba5	0.0031781	0.011238	261	2	104054176
Nipbl	0.0031839	0.011258	262	2	8350815
Zfml	0.0031839	0.011258	263	3	83929409
Pcdhb20	0.0032124	0.011349	264	4	37504994
Zfp773	0.0032341	0.011419	265	4	7132862
Cenpn	0.0032348	0.011422	266	1	116928558
Dnttip1	0.0032605	0.011525	267	3	164754147
Parpbp	0.0033077	0.011674	268	4	88144001
Tiam2	0.0033243	0.011729	269	4	3437305
Fam206a	0.0033246	0.01173	270	3	56803614
Lipt2	0.0033404	0.011781	271	2	100159467
Ttl	0.0033504	0.011816	272	3	129068892
Isx	0.0033662	0.011869	273	4	74890073
Eif3c	0.0033874	0.011935	274	1	126564461
Mocs3	0.0033944	0.01196	275	3	168230798
Snx14	0.0033962	0.011965	276	4	88398268
Srsf5	0.0034106	0.012015	277	2	80947590
Brd9	0.0034383	0.012109	278	1	73944849
Eif5a	0.0034389	0.012111	279	3	69919206
Smco3	0.003446	0.012133	280	2	136831839
Smr2	0.0034645	0.012205	281	4	88108708
Srp68	0.0034892	0.012286	282	1	116263278
Gls	0.0035191	0.012383	283	4	52232626
Col22a1	0.0035198	0.012387	284	4	71871805
4932443I19Rik	0.0035394	0.012452	285	4	13705998
Olfr1158	0.0035605	0.012522	286	2	87990524
Hmx3	0.0035631	0.012527	287	3	131543119
Fcrl1	0.0035677	0.012539	288	3	87384680
Zranb1	0.0035909	0.012618	289	2	132966690
Retn	0.0036065	0.012676	290	4	3656091
Olfr954	0.0036211	0.012723	291	4	39461831
Hsd17b4	0.0036253	0.012738	292	4	50166891
Dsn1	0.0036329	0.012768	293	2	157005301
Cdc27	0.0036418	0.012801	294	2	104526106
Oasl2	0.0036875	0.012947	295	3	114904981
Atp6v0e	0.0036926	0.012969	296	2	26676564
Prss57	0.0037097	0.013025	297	3	79784581
Pcif1	0.003715	0.013046	298	3	164886512
Zdhhc3	0.0037231	0.013073	299	4	123100359
Mrps23	0.0037435	0.013139	300	1	88205235
Suclg1	0.0037559	0.013181	301	3	73260519
Ggn	0.0037614	0.013201	302	2	29172829
Ptcra	0.0037651	0.01321	303	3	46758809
Epyc	0.0037688	0.013223	304	3	97670668
Haus3	0.0037943	0.01331	305	1	34167806
Olfr44	0.0038048	0.013342	306	3	39484962
Olfr1395	0.0038441	0.010632	307	3	49148453
Vps13d	0.0038452	0.013481	308	1	145122485
Gm2030	0.0038463	0.013483	309	3	26302689
Cdk17	0.0038848	0.013601	310	4	93212015
Maml1	0.0038961	0.013635	311	2	50266512
Fcgr2b	0.0038973	0.013638	312	4	170975904
Apol11b	0.0039066	0.013669	313	4	77635356
Lhb	0.0039073	0.013671	314	3	45421274
Vps16	0.0039146	0.013691	315	2	130438392
Maob	0.0039186	0.013705	316	4	16734169
Derl1	0.0039331	0.013752	317	3	57892229
Prss8	0.0039334	0.013753	318	4	127926828
1190005I06Rik	0.0039414	0.013783	319	4	120611255
Med31	0.003946	0.013795	320	4	72212028
Myo1h	0.0039481	0.013801	321	3	114323331
Rusc2	0.0039535	0.013819	322	4	43422245
C1s2	0.0039752	0.0139	323	4	124632085
Gm20865	0.0040182	0.014059	324	4	21243354
Mmp25	0.0040451	0.014142	325	3	23640144
Cyp4f16	0.0040486	0.014155	326	1	32542923
Cdc26	0.0040927	0.014306	327	3	62402779
Snap91	0.0040995	0.014328	328	2	86825003
Arhgap31	0.0041016	0.014334	329	2	38609060
Med24	0.004119	0.014389	330	2	98710149
Gm12887	0.0042134	0.014703	331	4	121622082
Hspa9	0.004252	0.014829	332	1	34943261
Ldha	0.0042731	0.014895	333	2	46850217
Bnc2	0.0043028	0.014998	334	1	84391062
Tbx1	0.0043091	0.015016	335	4	18583539
Cfap20	0.0043348	0.015103	336	4	95422875
Foxp4	0.0043538	0.015167	337	4	47888163
Usp16	0.004376	0.015232	338	2	87479132
Cdc14a	0.0043824	0.01525	339	4	116392867
Epha3	0.0043879	0.01527	340	3	63652500
Fam60a	0.0044045	0.015318	341	1	148926119
Gmnc	0.0044553	0.015484	342	3	26960716
Rnf4	0.0044559	0.015487	343	2	34350044
Flcn	0.0045002	0.015645	344	2	59802340
Krt9	0.0045029	0.015653	345	3	100192698
Park2	0.0045146	0.015697	346	3	11635343
Rbbp4	0.004528	0.015741	347	4	129322701
Tlx1	0.0045325	0.015757	348	2	45151005
Arhgdig	0.0045414	0.015788	349	4	26200198
Igll1	0.004557	0.015839	350	2	16862524
Rnf144b	0.0045606	0.01585	351	4	47207490
Atp8b5	0.0045664	0.015868	352	4	43361815
Pbp2	0.0045677	0.015872	353	4	135310260
Zbed3	0.004578	0.015908	354	4	95336176
Fbxw16	0.0046078	0.016004	355	3	109439546
Rcc2	0.0046109	0.016015	356	4	140715992
Ndufs7	0.0046219	0.016051	357	3	80254912
Cct2	0.0046302	0.016079	358	3	117062085
Trib2	0.0046507	0.016147	359	4	15815277
Dlx2	0.0046507	0.016147	360	4	71546038
Vmn2r42	0.0046587	0.016171	361	1	8194560
Atraid	0.0046667	0.016198	362	4	31052845
Pcolce	0.0046698	0.016208	363	3	137608953
Dhrs3	0.0047078	0.016342	364	4	144919494
Snx5	0.0047095	0.016347	365	2	144257126
Tmem52b	0.0047197	0.016383	366	4	129516679
Olfr775	0.004733	0.016434	367	2	129251081
Olfr734	0.0047603	0.016526	368	2	50320551
Mta3	0.0047703	0.016574	369	2	83738371
Zbbx	0.00483	0.016771	370	3	75078388
C77080	0.0048619	0.016869	371	1	129224302
2210016L21Rik	0.0048745	0.016917	372	4	114942293
Dcaf8	0.0049009	0.017002	373	4	172172471
Tceal1	0.0049128	0.017041	374	1	136708928
Trpm1	0.0049302	0.017099	375	4	64226804
Wnk1	0.0049579	0.017183	376	3	119949205
Wfdc16	0.0049653	0.017205	377	3	164638515
Styx	0.0050054	0.017335	378	2	45351525
Hypk	0.0050144	0.017362	379	2	121457251
Tmco1	0.0050171	0.017372	380	3	167309312
Med15	0.0050436	0.017471	381	3	17655679
Plgrkt	0.0050625	0.017524	382	4	29351057
Kdsr	0.0050652	0.017533	383	1	106743787
Mvb12a	0.0050727	0.017566	384	3	71545332
F8a	0.0050794	0.017585	385	3	73228920
Lrrc10b	0.0051033	0.017668	386	4	10457047
Ska3	0.005116	0.017711	387	1	57820282
Cntfr	0.0051306	0.017752	388	4	41671066
Rtkn2	0.0051328	0.017759	389	3	68026586
Pcdhb8	0.0051443	0.017786	390	3	37356425
Fgf1	0.0051507	0.017806	391	2	38858676
Krtap19-9b	0.0051668	0.017859	392	3	88932135
Rhbg	0.00519	0.017948	393	3	88247543
Pbsn	0.0052176	0.018046	394	2	77848100
Egln2	0.0052242	0.018065	395	3	27164757
Dimt1	0.0052684	0.018213	396	1	106949907
C1qtnf7	0.0052727	0.018225	397	3	43609226
Tsfm	0.0053114	0.018354	398	4	127024942
Gpr26	0.0053159	0.018367	399	4	131967135
Cfap57	0.005328	0.018406	400	4	118595836
Rcn2	0.0053637	0.018524	401	2	56056172
Ankdd1b	0.0053698	0.018542	402	4	96460838
Hdac1	0.0053702	0.018543	403	3	129524258
Kcnk2	0.0053744	0.018555	404	4	189295692
Pde12	0.0053945	0.018617	405	2	26668492
Cnpy4	0.0054114	0.018679	406	4	138190585
Pglyrp2	0.0054229	0.018726	407	3	32418719
Cdk12	0.0054282	0.018747	408	3	98211022
Taf7	0.0054716	0.018895	409	1	37643218
Kcnu1	0.0054753	0.018904	410	4	25851929
Tiprl	0.0054784	0.018914	411	2	165236730
Ogfod1	0.0055224	0.019065	412	1	94037438
Phgr1	0.0055284	0.019085	413	4	118777759
Sh3glb1	0.0055506	0.019151	414	4	144709299
Nrbp1	0.0055597	0.019173	415	3	31249669
1700025F22Rik	0.0055674	0.019198	416	2	11142349
Rbm43	0.0055719	0.019211	417	2	51929741
Krt42	0.0055732	0.019215	418	2	100269604
Ikbke	0.0055853	0.019257	419	2	131270909
Tmem254c	0.0055884	0.019266	420	3	26067113
Eefsec	0.0055943	0.019287	421	3	88358620
Prg3	0.0055995	0.019301	422	4	84991422
Csnk2b	0.005624	0.019391	423	1	35117856
Kbtbd4	0.0056436	0.019449	424	3	90909325
Map1lc3b	0.0056526	0.01948	425	2	121596063
Glud1	0.0056751	0.019552	426	4	34334171
Olfr1109	0.0057195	0.019697	427	4	87093333
Etnk1	0.0057203	0.0197	428	3	143184606
Nup62	0.0057256	0.019721	429	2	44829589
Olfr707	0.0057566	0.01982	430	3	106891791
Gm21693	0.0057645	0.01984	431	3	3333190
Pax9	0.0057748	0.019872	432	2	56696843
Sec62	0.0057763	0.019879	433	1	30800210
Ddx3x	0.0057973	0.019951	434	4	13288596
Pcp4	0.0058113	0.019995	435	4	96493824
Bcl9	0.0058271	0.020051	436	1	97212872
Cers6	0.0058661	0.020188	437	3	68947293
Qars	0.0058779	0.02023	438	2	108511538
Nudt3	0.0058982	0.020299	439	2	27596788
Zfp68	0.0059287	0.020406	440	2	138607524
Cbr2	0.0059685	0.020539	441	4	120730501
Hmbs	0.0059853	0.020611	442	3	44342040
Lsmem1	0.0060031	0.020672	443	4	40185355
Nacad	0.0060079	0.020687	444	3	6602477
Fbxl22	0.0060163	0.020717	445	4	66514249
Rnf39	0.0060267	0.020753	446	3	36943323
Khdrbs3	0.0060302	0.020774	447	2	69029778
Rhag	0.006046	0.020821	448	3	40828484
Tspan31	0.0060594	0.020867	449	4	127070129
Olfr773	0.0060977	0.02098	450	4	129187109
Zfp128	0.0061318	0.02109	451	1	12890688
Arhgap25	0.0061692	0.021223	452	4	87466551
Srprb	0.0061825	0.021268	453	2	103201995
Dlx6	0.0061827	0.021268	454	3	6863682
Tsen34	0.0061985	0.021313	455	4	3695084
Gm11541	0.0062024	0.021324	456	4	94704088
Tpt1	0.0062144	0.021361	457	2	75845656
Zfy2	0.0062569	0.021505	458	2	2116242
D1Ertd622e	0.0062711	0.021546	459	2	97646234
Nupr1l	0.0062805	0.021575	460	2	129908680
Gpn2	0.0062841	0.021583	461	1	133584605
Vmn2r14	0.0063011	0.021631	462	4	109220380
Afg3l1	0.0063033	0.021639	463	3	123493931
Gnpat	0.0063042	0.021643	464	3	124878637
Tnmd	0.0063266	0.021713	465	3	133859838
Phtf1	0.0063348	0.021741	466	2	103996642
Stk38	0.006375	0.021881	467	4	28979255
Pou3f3	0.0063812	0.021905	468	3	42697916
Rhox3f	0.0063856	0.021916	469	2	37581840
Olfr970	0.0064332	0.022063	470	3	39820207
Zbtb49	0.0064932	0.022249	471	4	38205929
Gm4301	0.0065379	0.022398	472	1	100335854
Marveld2	0.0065458	0.022422	473	4	100611816
Ccne2	0.0065675	0.022494	474	2	11193967
Phf5a	0.0065886	0.022559	475	1	81870402
Sbno1	0.0066038	0.022612	476	3	124404239
Pi4kb	0.0066208	0.022668	477	2	94994177
Ntn3	0.0066354	0.022717	478	3	24208332
Wbp4	0.006645	0.022752	479	4	79472472
Trim32	0.006662	0.022807	480	3	65614382
Oxsm	0.0066901	0.022913	481	2	16242650
Nsg2	0.0066938	0.022923	482	2	32017713
Cnbp	0.0067182	0.023003	483	2	87845682
Ehd4	0.0067205	0.023012	484	3	120136937
Car3	0.0067622	0.023161	485	3	14868389
Fam83h	0.0067696	0.023188	486	2	76004421
Olfr243	0.0067699	0.023189	487	4	103717122
Cldn19	0.0067729	0.0232	488	4	119257001
Adam23	0.0067916	0.023251	489	1	63546481
Cep95	0.0067957	0.023265	490	3	106800107
Smim12	0.006803	0.023286	491	4	127246933
Ephb3	0.0068261	0.023352	492	2	21218209
Ostc	0.0068423	0.023395	493	1	130709289
Tnfaip8l3	0.0068458	0.023409	494	3	54027380
Smg1	0.0069238	0.023644	495	3	118157187
Reg3b	0.0069373	0.02369	496	2	78371832
Bend5	0.0069438	0.023705	497	1	111433212
Gm7534	0.0069945	0.023886	498	3	134201921
Olfr610	0.0070058	0.019102	499	3	103506518
Phox2a	0.0070188	0.023959	500	4	101820911
Cd14	0.0070326	0.02399	501	3	36726115
Dnase2b	0.0071131	0.024189	502	3	146586958
Katna1	0.0071225	0.024216	503	3	7748891
Gm10439	0.0071225	0.024216	504	3	149616838
Ppcs	0.0071468	0.024274	505	1	119421654
Golga1	0.0071648	0.024315	506	2	39052093
Dusp5	0.0071741	0.024335	507	3	53537614
Oxtr	0.0071749	0.024335	508	3	112489443
Cds2	0.0071868	0.024366	509	3	132298494
Cldn16	0.0071901	0.024375	510	2	26463538
Pspc1	0.0071975	0.024388	511	1	56771938
Dhx37	0.0072406	0.024477	512	2	125422125
Zdhhc14	0.0072482	0.024495	513	2	5685800
Cadm2	0.0072641	0.024528	514	3	66812848
Kdm5c	0.0072843	0.024569	515	3	152266730
Man2b1	0.007311	0.024639	516	3	85091585
1600002H07Rik	0.0073497	0.024723	517	1	24219920
Clec2i	0.0074004	0.024832	518	1	128894772
Defb29	0.0074035	0.024839	519	3	152539944
Acsl4	0.0074064	0.024846	520	3	142343328
Pid1	0.0074086	0.024853	521	2	84038300
Dync2h1	0.0074511	0.024952	522	2	7142281
Grap2	0.0074615	0.024978	523	3	80638495
Eif3l	0.0074788	0.025013	524	3	79086474
Ccdc17	0.0074809	0.025018	525	3	116597852
Pfdn5	0.0075018	0.025069	526	1	102328586
Dhx29	0.0075525	0.025177	527	2	112947310
Krt15	0.0075778	0.025237	528	3	100133663
Prdx2	0.0075854	0.025255	529	3	84970340
Arpc4	0.0076032	0.025296	530	1	113385575
Csgalnact2	0.0076044	0.025298	531	2	118121073
Tmem143	0.0076147	0.025315	532	2	45909336
Atp13a2	0.007654	0.025392	533	1	140995341
Prr19	0.0077047	0.025502	534	2	25302955
Olfr1510	0.0077317	0.02557	535	3	52410630
Gxylt2	0.007745	0.025601	536	3	100705120
Wdr59	0.0077994	0.025732	537	3	111485098
Fgf10	0.0078061	0.025748	538	1	118715668
Tppp2	0.0078597	0.02588	539	3	51918820
Tada3	0.0078821	0.025923	540	1	113375971
Rab22a	0.0078972	0.025966	541	2	173695137
Per1	0.0079289	0.026039	542	3	69101280
Aff2	0.007954	0.026092	543	3	69544712
Vsx1	0.0079582	0.0261	544	2	150688519
Vmn2r28	0.0079925	0.026185	545	2	5484081
Acox1	0.0080089	0.026222	546	1	116198349
Mrps7	0.0080456	0.026313	547	3	115604798
Gadd45gip1	0.0080596	0.026346	548	1	84832435
Ppt2	0.0080669	0.026364	549	2	34626525
Tubg2	0.008074	0.026381	550	3	101156496
Btaf1	0.0080785	0.026393	551	3	36972931
Diras2	0.0081103	0.026467	552	1	52508200
Ep300	0.0081104	0.026467	553	3	81632483
Samd4	0.008147	0.026557	554	3	47052952
Rptn	0.008161	0.026586	555	3	93395856
Efcab2	0.0082044	0.026692	556	3	178437482
Acot11	0.0082276	0.026733	557	2	106771451
Dap3	0.0082481	0.026788	558	3	88933577
Lrrc59	0.0082545	0.026807	559	3	94634546
Prkar2a	0.0082623	0.026825	560	1	108692662
Angptl4	0.0082758	0.026856	561	3	33781153
Wdfy3	0.008313	0.026944	562	2	101888198
Mast1	0.008349	0.027028	563	2	84925453
Cetn3	0.0083637	0.027065	564	1	81786925
B4galt6	0.0083653	0.027068	565	3	20727973
Supt4a	0.008373	0.02264	566	1	87737627
Gm8439	0.0084006	0.027143	567	3	120588848
Rad1	0.0084144	0.027174	568	1	10490284
Vps72	0.0084609	0.027284	569	3	95111198
Bpi	0.0084651	0.027293	570	1	158262406
Cebpa	0.0084877	0.02735	571	2	35119906
Fgd2	0.0085041	0.027388	572	3	29363887
Dio3	0.0085205	0.027425	573	2	110279697
Crct1	0.0085561	0.027506	574	2	93014732
Cnot8	0.0085643	0.027525	575	2	58111422
Cinp	0.0085664	0.027527	576	2	110883924
Snhg11	0.0085917	0.027595	577	3	158377002
Dnajc24	0.0086678	0.027781	578	3	105980987
Sned1	0.0086939	0.027842	579	3	93259755
Adora3	0.0087691	0.02802	580	2	105904945
Nxf1	0.0088198	0.028138	581	2	8762710
Pfn3	0.0088704	0.02825	582	1	55415112
Stfa2	0.0089718	0.028486	583	2	36404142
Cep170b	0.0089856	0.028513	584	3	112736409
Cnot4	0.0090026	0.028555	585	2	35052927
Klk9	0.0090224	0.028605	586	2	43792183
Ago4	0.0090731	0.028722	587	3	126515910
Gm21541	0.0090933	0.028767	588	3	41903717
Dusp7	0.0091105	0.028806	589	3	106370749
Kcnj2	0.0091166	0.028816	590	3	111072013
Olfr1474	0.0091237	0.028833	591	2	13471157
Cdk1	0.0091424	0.028886	592	3	69342545
Cchcr1	0.0091435	0.028888	593	3	35528174
Csnk1a1	0.0091491	0.0289	594	2	61556548
Txn1	0.0091548	0.028914	595	3	57951856
Ceacam10	0.0092058	0.02904	596	2	24780944
Cdc20b	0.0092116	0.029053	597	3	113064285
Smdt1	0.0092228	0.029083	598	3	82346216
Ostm1	0.009225	0.029086	599	1	42679396
Sap130	0.0092757	0.0292	600	2	31666351
Serpinb6b	0.0092848	0.029226	601	3	32971521
Kctd11	0.009311	0.029287	602	2	69880064
Rilpl2	0.0093384	0.029346	603	3	124478001
Nav2	0.009377	0.029446	604	1	49453488
Hars	0.0094276	0.029557	605	2	36773533
Pex3	0.0094783	0.029679	606	2	13537452
Lrwd1	0.0094799	0.029684	607	2	136133067
Epha6	0.0094903	0.029714	608	3	60205477
Hist1h2bm	0.0095289	0.029797	609	3	21722324
Tas2r113	0.0095446	0.029839	610	3	132893414
H2-D1	0.0095687	0.029901	611	3	35263181
Kazald1	0.0095796	0.029922	612	1	45076822
Acer2	0.0095839	0.029932	613	3	86886214
Rasgrp1	0.00963	0.030034	614	2	117298473
Mrpl28	0.009682	0.030154	615	3	26123683
Fam198b	0.0097306	0.030281	616	3	79908671
Slc28a2	0.0097315	0.030283	617	2	122441788
Dyrk1b	0.0097346	0.03029	618	3	28185318
Tas2r138	0.0097821	0.030394	619	2	40613021
Carm1	0.0098051	0.030448	620	3	21583585
Agrp	0.0098103	0.030462	621	3	105566916
Lin37	0.0098104	0.030462	622	2	30557642
Wdr5b	0.0098327	0.030517	623	2	36041707
4930433I11Rik	0.0098813	0.030621	624	3	40993483
Kcnj9	0.0098833	0.030626	625	2	172326271
Mrpl43	0.0098866	0.030635	626	2	45005926
Gmds	0.0098942	0.030655	627	3	32234358
Zfp276	0.0099267	0.030724	628	3	123258340
Pf4	0.0099541	0.030789	629	3	90772609
Paip1	0.0099846	0.030867	630	1	119430295
Tas2r116	0.0099917	0.030882	631	3	132855517
Hacd3	0.010007	0.030918	632	3	65001007
Usb1	0.010024	0.03096	633	3	95333520
Trim80	0.010028	0.030971	634	3	115441654
Tex264	0.010035	0.030988	635	2	106681967
Olfr384	0.01004	0.030993	636	2	73603030
Galnt16	0.010063	0.031051	637	3	80581232
Grasp	0.010086	0.0311	638	2	101229043
Olfr1295	0.010166	0.031293	639	3	111565103
Tcte1	0.010191	0.031353	640	2	45539756
Defb18	0.010223	0.03143	641	3	18236600
Nampt	0.010231	0.031448	642	3	32840938
Smtnl1	0.010238	0.031464	643	1	84818717
Cdc16	0.010249	0.031491	644	3	13769427
Gipc2	0.010277	0.031566	645	2	152165671
Cyb5r4	0.010339	0.031711	646	1	87040458
St7l	0.010358	0.031768	647	2	104865303
Mup21	0.010389	0.031847	648	2	62150704
Ube2h	0.010396	0.031868	649	3	30260994
Wnt7a	0.0104	0.03188	650	3	91394654
Fam83g	0.010406	0.031895	651	3	61684736
Ipp	0.01044	0.031975	652	2	116520778
Uba1y	0.010491	0.032093	653	2	825528
Adck2	0.010499	0.032108	654	3	39574768
Grp	0.010502	0.03212	655	2	65873729
Sephs2	0.010512	0.032144	656	2	127273569
Efna4	0.010534	0.032205	657	3	89335339
Med16	0.010541	0.032223	658	1	79907496
Tpm2	0.010554	0.032254	659	3	43519723
Wdr75	0.010584	0.032316	660	2	45802089
Kcnc1	0.010626	0.032404	661	3	46427874
Supt3	0.01063	0.032416	662	3	44991763
Pclo	0.010637	0.032434	663	3	14522320
Paxbp1	0.010651	0.032466	664	2	91027139
Rnf186	0.010693	0.032543	665	2	138967670
Pramel1	0.010718	0.032593	666	2	143398397
Pld6	0.010765	0.032704	667	3	59787253
Lrba	0.010794	0.032783	668	2	86315370
Wdr91	0.010809	0.032819	669	3	34909480
Vmn1r151	0.010821	0.03284	670	3	22499114
Adcyap1	0.010826	0.032848	671	3	93202322
Gas1	0.010843	0.032883	672	3	60176212
Arhgdib	0.010845	0.032886	673	1	136932326
Dmc1	0.010866	0.032934	674	3	79585127
Bclaf1	0.010889	0.03299	675	3	20325415
Rwdd1	0.010895	0.033002	676	1	34019377
Fzd5	0.010898	0.033008	677	3	64736426
l7Rn6	0.01092	0.033059	678	3	89935800
Opn3	0.01093	0.033076	679	3	175665579
Nsmaf	0.010938	0.033094	680	3	6420058
Tdrd3	0.010946	0.033111	681	3	87472117
Sestd1	0.010992	0.033215	682	3	77212521
Myo1g	0.010997	0.033227	683	3	6519045
Olfr638	0.011009	0.033257	684	2	104003419
Gnb2l1	0.011047	0.033353	685	1	48803450
A730017C20Rik	0.011148	0.033579	686	2	59062502
a	0.011149	0.03358	687	3	155045770
Usp21	0.011179	0.03365	688	3	171284673
Senp1	0.011237	0.033777	689	3	98066774
Med26	0.01125	0.033804	690	2	72496376
Grik3	0.011285	0.033879	691	2	125649749
Otulin	0.011298	0.03391	692	2	27608770
Triobp	0.0113	0.033917	693	1	78967745
Sec13	0.011351	0.034024	694	2	113734656
Amotl2	0.011366	0.034062	695	2	102724751
E030030I06Rik	0.011379	0.034097	696	2	22148897
Magoh	0.011401	0.034147	697	1	107883087
C1qtnf1	0.011452	0.03427	698	2	118443787
Actr3	0.011502	0.03437	699	3	125407326
Itga11	0.01153	0.03443	700	2	62744063
Med30	0.011553	0.034487	701	2	52712617
Tcf24	0.011556	0.034493	702	3	9967419
Neurl4	0.011574	0.03453	703	2	69906826
Spp1	0.011603	0.034605	704	2	104439419
Mettl21e	0.011654	0.034722	705	1	44210236
Slc39a4	0.011671	0.034757	706	3	76614522
Bloc1s3	0.011705	0.034841	707	1	19507253
Pcdh11x	0.01172	0.034881	708	2	120400509
Nell1	0.011751	0.034954	709	2	50448885
Tusc5	0.011755	0.034962	710	1	76680392
Arl8a	0.011768	0.034994	711	3	135152484
Chid1	0.01179	0.035041	712	2	141515478
Svs4	0.011806	0.035072	713	2	164277253
Fbxl19	0.011809	0.035078	714	3	127752364
Dpagt1	0.011829	0.035129	715	3	44328116
C2	0.011856	0.035195	716	2	34866598
Atp6v1e1	0.01186	0.035199	717	2	120807628
Mzt2	0.011863	0.035206	718	3	15862872
Rnf130	0.011885	0.035253	719	2	50052855
Olfr787	0.011907	0.035307	720	1	129462823
Pigr	0.011953	0.035421	721	2	130844899
Psmb5	0.011969	0.035456	722	2	54617805
Creld1	0.011986	0.035497	723	3	113489600
Cyp2u1	0.012008	0.035545	724	3	131298070
Gm7694	0.01203	0.035597	725	3	170301431
Msgn1	0.012033	0.035606	726	2	11208658
Cpb1	0.012046	0.035629	727	2	20263689
Trappc5	0.012058	0.035658	728	3	3679300
Pcolce2	0.012065	0.035675	729	2	95678423
Ttll7	0.012078	0.035703	730	2	146909513
Olfr403	0.012091	0.035737	731	2	74196008
Nle1	0.012109	0.035775	732	2	82908136
Clec2e	0.012159	0.035888	733	3	129098447
Mrpl30	0.012168	0.035905	734	3	37894004
Mmp21	0.01217	0.035909	735	3	133677254
Cyp1b1	0.01221	0.036005	736	2	79714125
Srpk3	0.012261	0.036125	737	2	73776244
Olfr1263	0.012269	0.036142	738	3	90015362
Gskip	0.012317	0.036249	739	3	105698738
Tusc2	0.012361	0.036349	740	3	107563516
Esp24	0.012362	0.03635	741	1	39040036
Srsf12	0.012412	0.036466	742	1	33209173
Ptprs	0.012442	0.036536	743	3	56427972
Smek2	0.012485	0.033065	744	2	29188319
Stfa1	0.012513	0.036681	745	1	36277215
Ofd1	0.012526	0.036705	746	3	166435439
Mfhas1	0.012564	0.036783	747	2	35589720
Rad54b	0.012565	0.036786	748	3	11606096
Scp2	0.01257	0.036799	749	3	108107650
Gnai1	0.012572	0.036806	750	2	18360100
Hnrnpul1	0.012614	0.036907	751	2	25748336
P4ha1	0.012651	0.036981	752	3	59352191
Arhgef9	0.012665	0.037012	753	1	95077469
Eif2b3	0.012691	0.037077	754	3	117044485
Rnf222	0.012708	0.037109	755	3	68892914
Qtrtd1	0.012715	0.037127	756	2	43869002
Lcn3	0.01273	0.037162	757	2	25766095
Alg8	0.012743	0.037187	758	3	97382966
Plxna2	0.012843	0.037418	759	3	194746147
Cpt1b	0.012889	0.03753	760	2	89420126
Cd22	0.012917	0.037593	761	2	30872820
Usp54	0.012964	0.037698	762	3	20576623
Uba3	0.012968	0.037703	763	1	97196847
Ap4b1	0.013036	0.037863	764	2	103814843
Chst4	0.013109	0.038023	765	3	110030475
Smc3	0.013119	0.038044	766	2	53623584
Rasgrp3	0.013122	0.038048	767	3	75497057
Ccl8	0.013143	0.03809	768	2	82116144
Serpinb2	0.01317	0.038144	769	1	107522213
Mtf2	0.01322	0.038259	770	3	108093402
Ndufs5	0.013271	0.038382	771	2	123715986
Sart1	0.013284	0.03841	772	2	5388324
Tnfrsf14	0.013344	0.038548	773	2	154926663
Map1s	0.013353	0.035243	774	2	70911868
Tek	0.013371	0.038613	775	2	94798648
Olfr480	0.013372	0.038614	776	3	108066276
Krtap1-3	0.013422	0.038728	777	2	99591281
Olfr586	0.013425	0.038738	778	2	103122283
Tnfrsf10b	0.013431	0.038749	779	3	69770871
Spdef	0.013431	0.038749	780	3	27720160
Arid1b	0.013441	0.038771	781	3	5321400
Vmn1r148	0.013473	0.038837	782	3	22414277
Bsg	0.013523	0.038958	783	2	79710078
Adam5	0.013541	0.038998	784	2	24810046
Zfp3	0.013547	0.039019	785	2	70771483
Ndp	0.01357	0.03907	786	3	16886637
Ksr2	0.013643	0.03924	787	2	117685539
Clasrp	0.013675	0.03932	788	3	19594967
Vgll1	0.013684	0.039343	789	2	57092344
Fam189a2	0.013734	0.039463	790	3	23978096
Atf7ip	0.013734	0.039463	791	3	136561218
1700008F21Rik	0.013742	0.039484	792	3	129072591
Fam213b	0.013754	0.039515	793	3	154898553
Olfr134	0.013758	0.039523	794	3	38175570
Sox17	0.013764	0.039539	795	3	4492297
Eif4a3	0.01377	0.039548	796	3	119294601
Ergic1	0.013776	0.039561	797	3	26635999
Aqr	0.013793	0.039596	798	2	114148968
Sesn2	0.013826	0.039684	799	2	132498088
Svs2	0.013877	0.039796	800	2	164237712
Specc1l	0.013896	0.039842	801	2	75246057
Hspe1	0.013927	0.039923	802	2	55089192
Pax6	0.013931	0.03993	803	2	105685070
Sh2d4b	0.013955	0.039979	804	3	40872544
Oit3	0.01396	0.039992	805	3	59438811
Vmn1r95	0.013967	0.03679	806	3	20193804
Chd2	0.013974	0.040024	807	3	73469558
Dazap2	0.013979	0.040034	808	2	100618059
Tppp3	0.014011	0.040112	809	3	105468237
Zcchc2	0.014034	0.040155	810	2	105991299
9430007A20Rik	0.014041	0.040171	811	2	144522400
Fam50a	0.014069	0.040242	812	3	74315552
Krtap6-1	0.014096	0.040315	813	2	89031807
Ascc1	0.014105	0.040333	814	3	60013620
Vmn2r41	0.014129	0.040396	815	2	8158241
Oraov1	0.014179	0.040515	816	1	144917627
Ndufa7	0.014196	0.04055	817	3	33829748
Lynx1	0.014201	0.040561	818	3	74751614
Mettl6	0.01423	0.040623	819	2	31492327
Uts2b	0.014256	0.040691	820	2	27364724
Gbas	0.01428	0.040745	821	2	129744729
Olfr401	0.014291	0.040771	822	3	74121778
Pcdhb12	0.014331	0.040862	823	1	37436317
Rbm47	0.014339	0.040882	824	3	66027020
Gtf3c5	0.014345	0.040894	825	3	28582875
Opa1	0.014406	0.041034	826	2	29615967
Nr4a1	0.014406	0.041034	827	2	101270806
Ralgps1	0.014518	0.041291	828	3	33174446
Fam46b	0.014533	0.041327	829	1	133486389
Thoc1	0.014558	0.041383	830	3	9986320
Slc10a1	0.014583	0.041432	831	1	80960569
Tmcc2	0.014585	0.041436	832	2	132361020
Skil	0.014597	0.04146	833	3	31098159
Tmem210	0.014662	0.041619	834	3	25288457
Axin1	0.014676	0.041653	835	2	26143559
Pgam1	0.014684	0.041673	836	2	41912113
Eif2b5	0.014785	0.041893	837	1	20502715
Tnfrsf8	0.014809	0.041962	838	3	145303120
Cyp2c38	0.014817	0.041983	839	3	39436091
Drd4	0.014825	0.042002	840	3	141294002
Adm	0.014835	0.042025	841	3	110628589
Eef1g	0.014835	0.042025	842	2	8969380
Zp1	0.014886	0.042159	843	1	10919390
Fgfr1op	0.014891	0.042174	844	3	8170136
Mefv	0.014924	0.04225	845	3	3717879
Ghr	0.014936	0.042283	846	1	3388681
St3gal4	0.014967	0.042354	847	2	35053462
Acat3	0.014987	0.042404	848	2	12929637
Olfr868	0.015002	0.042438	849	3	20101051
Olfr130	0.015002	0.042438	850	2	38067456
Mapk8ip1	0.015037	0.042524	851	1	92386640
Slc25a29	0.015063	0.042583	852	3	108827313
Katnal1	0.015077	0.042614	853	2	148892553
Arf4	0.015077	0.042614	854	2	26646997
Galnt5	0.015087	0.042633	855	1	58014852
Cd8b1	0.015116	0.042704	856	2	71326344
Psmd14	0.015134	0.04275	857	2	61763903
Cryl1	0.015138	0.042754	858	2	57303776
Fam69c	0.015152	0.042783	859	3	84730676
Gm21943	0.015181	0.042836	860	2	57531973
Rpl21	0.015188	0.042849	861	1	146834462
Lrrc28	0.015239	0.042957	862	1	67618116
Pgpep1l	0.015267	0.043015	863	3	68237798
Bcl2a1c	0.015289	0.043063	864	1	114330319
Cdkn2c	0.015308	0.04311	865	3	109665091
Zfp369	0.015324	0.043146	866	3	65280299
Pcdhb10	0.015375	0.043252	867	2	37412057
Ubash3b	0.015382	0.043265	868	2	41050578
Atxn10	0.01539	0.043286	869	1	85391648
Grid2ip	0.015411	0.043335	870	3	143379314
P3h2	0.01544	0.043407	871	2	25992679
Ddx58	0.01544	0.043409	872	2	40216368
Neurod2	0.015541	0.043652	873	3	98327632
Tcf4	0.015548	0.043667	874	3	69564136
Tubb5	0.015592	0.043765	875	2	35836714
Gjc2	0.015616	0.04382	876	3	59176957
Epb4.1l4a	0.015628	0.043841	877	3	33874785
Wwc1	0.015642	0.043879	878	1	35915238
Trappc6b	0.015692	0.043998	879	1	59050370
Adgrg3	0.015723	0.044072	880	3	95035895
Synm	0.015743	0.044114	881	1	67759514
Gm7849	0.015775	0.044193	882	3	21456415
Edc4	0.015793	0.044239	883	2	105887553
Zfp239	0.015825	0.044303	884	2	117871662
Wasf1	0.015832	0.044322	885	3	40926565
Mrpl52	0.015844	0.044348	886	2	54427236
Vmn1r103	0.015872	0.044424	887	2	20510069
Ift46	0.015894	0.04447	888	3	44783973
Trove2	0.015901	0.044492	889	3	143770918
Hmgcr	0.015901	0.044492	890	3	96666189
Tspan8	0.015927	0.044553	891	3	115835355
Rpl27	0.015944	0.044596	892	2	101443509
Plet1	0.015956	0.04463	893	3	50499108
Eml5	0.015959	0.044639	894	3	98830920
Hormad2	0.016045	0.044837	895	3	4427252
Mertk	0.016062	0.044874	896	3	128738352
Olfr1359	0.016066	0.044882	897	2	21703334
Psmd1	0.016068	0.044885	898	3	86090140
Irf8	0.016077	0.044902	899	3	120743872
Ssh3	0.016133	0.045027	900	2	4264047
1700003E16Rik	0.016146	0.045053	901	1	83162083
Vstm5	0.016182	0.045135	902	3	15257334
Tnks1bp1	0.016196	0.045164	903	1	85052406
Lama3	0.016217	0.045216	904	2	12497896
Zfp941	0.016241	0.045264	905	3	140812752
Vmn1r202	0.016247	0.045281	906	1	22501862
Cntf	0.016259	0.045317	907	3	12764194
Skp1a	0.016297	0.045406	908	1	52243621
Olfr574	0.016302	0.04258	909	1	102948562
1200014J11Rik	0.016339	0.045498	910	2	73070897
Olfr225	0.016356	0.045539	911	3	59613217
Defb40	0.016365	0.045567	912	2	18978061
C1qbp	0.016391	0.045618	913	2	70982306
Nsa2	0.016406	0.045653	914	2	97135387
Pdia6	0.016421	0.045681	915	2	17278946
Dynll2	0.016448	0.045745	916	3	87981533
Tmem178b	0.016481	0.045816	917	3	40245592
Cd276	0.016495	0.045849	918	2	58537340
Acat2	0.016499	0.045852	919	1	12947369
Pfn1	0.016503	0.045862	920	2	70654360
Trpt1	0.016525	0.045927	921	2	6998101
Eef2	0.016549	0.045984	922	2	81179766
Nrbp2	0.016599	0.046099	923	1	76088701
Ndnf	0.016611	0.04613	924	2	65703298
Actr2	0.016642	0.043424	925	2	20094343
Psmc1	0.01665	0.046212	926	1	100116736
Slco1a6	0.016675	0.046263	927	3	142101623
Wdr19	0.016697	0.046307	928	3	65222112
Uchl3	0.0167	0.046316	929	1	101666664
Wfdc10	0.016733	0.046394	930	3	164657127
Adam24	0.016738	0.046409	931	2	40680211
Btn2a2	0.016788	0.046514	932	3	23486138
Elovl2	0.016788	0.046514	933	3	41189999
Gm4214	0.016801	0.046538	934	1	22984580
Adamts15	0.016809	0.046558	935	3	30921846
Pxk	0.016809	0.046558	936	3	8138063
Opn4	0.016809	0.046559	937	3	34596390
Cops7a	0.016851	0.046649	938	2	124962634
Serpina1d	0.016892	0.046738	939	2	103765920
Rptor	0.016901	0.046759	940	3	119871519
Rpn1	0.016952	0.04689	941	3	88093951
Sprr2k	0.017002	0.047001	942	3	92433464
Ddr2	0.017005	0.047009	943	2	170001890
Ksr1	0.017053	0.047119	944	1	79036726
Cdk19	0.017055	0.047125	945	3	40436167
Rer1	0.017128	0.047296	946	3	155082699
Wdr73	0.017153	0.047346	947	2	80898557
Ido2	0.017179	0.047411	948	2	24558187
Rfx8	0.017204	0.047474	949	2	39718496
Hnrnpab	0.017213	0.047488	950	3	51606406
Wnt8a	0.017254	0.047581	951	2	34545538
Fam193a	0.017304	0.047703	952	1	34410628
Slc43a1	0.017316	0.047729	953	3	84855632
Bhlhb9	0.017324	0.047746	954	3	135889308
Gm16501	0.017355	0.047819	955	2	2720466
Mepe	0.017377	0.047859	956	2	104337156
Iqcf3	0.017405	0.047925	957	2	106560968
Bmpr2	0.017455	0.048037	958	1	59815254
Itgae	0.017506	0.048144	959	1	73111389
Ppp6c	0.017556	0.048254	960	2	39204854
Thy1	0.017598	0.048352	961	3	44046696
Cdk15	0.017606	0.048368	962	1	59257841
Tmem8c	0.017657	0.04846	963	2	27071922
Fstl3	0.017741	0.04864	964	2	79780103
Ocln	0.017757	0.048676	965	3	100515131
Atp4b	0.0178	0.048777	966	3	13393546
Gm9112	0.017806	0.04879	967	3	102707541
Olfr1105	0.017808	0.048793	968	2	87033803
Adam10	0.01781	0.048795	969	2	70722680
Zdhhc4	0.017837	0.048858	970	2	143324888
Aptx	0.01784	0.048863	971	3	40691180
Cops2	0.017847	0.04888	972	3	125842627
Ptgs2	0.017858	0.048901	973	2	150102673
Ihh	0.01786	0.048908	974	3	74948324
Tmem168	0.017876	0.048936	975	2	13602920
Ston1	0.017908	0.04901	976	2	88635569
Defa25	0.017959	0.049126	977	3	21084488
Slco2b1	0.017966	0.049143	978	3	99685552
Tulp4	0.018	0.049214	979	3	6214821
Ppef2	0.018009	0.049236	980	1	92238916
Oog4	0.018019	0.049259	981	2	143438772
Cdk2ap2	0.018054	0.049337	982	2	4097879
Taar3	0.018059	0.049355	983	1	23949934
Thbs4	0.018084	0.049405	984	3	92774758
Luzp1	0.018109	0.049465	985	2	136542039
Mapt	0.018144	0.049548	986	3	104310405
Csrp2	0.01816	0.049584	987	1	110932011
Hist1h2an	0.018162	0.049591	988	2	21787071
Ralgps2	0.01817	0.049611	989	2	156901791
Olfr572	0.018201	0.049676	990	2	102928025
Lamtor2	0.018209	0.049691	991	2	88552420
Pfdn1	0.01826	0.049811	992	3	36451123
Epn3	0.018264	0.049819	993	3	94495035
Rnf146	0.018322	0.049953	994	3	29347217
Sag	0.018331	0.049969	995	3	87824436
Wrb	0.018361	0.050038	996	2	96145577
Drg1	0.018393	0.050119	997	3	3262580
Ucn3	0.018411	0.05017	998	1	3941347
Scgb2b3	0.018419	0.05019	999	3	31360190
Denr	0.018462	0.050282	1000	1	123908179
Phldb3	0.018486	0.047943	1001	2	24616890
Gm4307	0.0185	0.05037	1002	3	100361872
Kdm3a	0.018519	0.050408	1003	3	71620513
Timm22	0.018537	0.050451	1004	1	76409694
Zfp661	0.018612	0.050614	1005	2	127577838
5430419D17Rik	0.01864	0.050673	1006	2	131228914
Irf5	0.018648	0.050697	1007	2	29535792
Cyp2s1	0.018655	0.05071	1008	3	25809557
Rcan3	0.018687	0.050774	1009	2	135420276
Serpina3j	0.018713	0.050822	1010	2	104317423
H2-M2	0.018746	0.050886	1011	3	37483184
Zmiz1	0.018751	0.0509	1012	3	25653434
Serpinb13	0.018763	0.05092	1013	2	106982827
C7	0.01879	0.050977	1014	2	5031988
Asns	0.01879	0.050978	1015	3	7682292
Ehd2	0.018814	0.051028	1016	1	15957805
Bco2	0.018829	0.051061	1017	2	50540139
Ccdc160	0.018833	0.05107	1018	3	52798630
Sbk3	0.018855	0.051114	1019	3	4967701
Usp34	0.01886	0.051126	1020	3	23412411
Npm1	0.018864	0.051135	1021	1	33160912
Actl7b	0.018868	0.051148	1022	3	56740936
Ogdh	0.018914	0.051252	1023	2	6316980
Fam178a	0.018948	0.051329	1024	2	44947975
Pex5	0.018964	0.051367	1025	3	124405174
Zbtb21	0.018972	0.051382	1026	2	97956799
F830045P16Rik	0.019001	0.051447	1027	3	129474541
Irgc1	0.019003	0.051453	1028	2	24433072
Sphk1	0.019051	0.051567	1029	2	116535170
Gps1	0.019054	0.051577	1030	3	120785212
Tomt	0.019065	0.051604	1031	1	101902072
Mpv17l2	0.019091	0.051662	1032	2	70760407
9430038I01Rik	0.019115	0.051712	1033	2	137387661
Pcf11	0.01915	0.051784	1034	3	92661992
Cerkl	0.019166	0.051824	1035	1	79393012
Rft1	0.019216	0.05194	1036	3	30661280
Lhx8	0.019217	0.051943	1037	3	154322294
Tnfrsf9	0.019225	0.051963	1038	3	150933098
Trem3	0.019233	0.051981	1039	3	48249770
Fxyd7	0.019242	0.052007	1040	2	31051361
Cyb5r3	0.019266	0.052063	1041	2	83161894
Ptges	0.019316	0.052203	1042	1	30892779
Kctd8	0.019326	0.052226	1043	2	69340635
Atp1b1	0.019328	0.052232	1044	3	164457770
Bloc1s1	0.019367	0.052318	1045	1	128922660
Cd6	0.019375	0.052336	1046	3	10799306
Rxra	0.019415	0.052421	1047	3	27748750
Wnt5b	0.019417	0.052424	1048	3	119446449
Tma7	0.019467	0.052532	1049	2	109082171
Vmn2r116	0.019475	0.052547	1050	2	23387191
Plekho2	0.019516	0.052632	1051	3	65559448
Endod1	0.019517	0.052633	1052	2	14357591
St6galnac5	0.019539	0.052678	1053	3	152846325
Klra10	0.019547	0.052695	1054	3	130281875
Cdr2	0.019562	0.052728	1055	3	120960510
Lrrc7	0.019568	0.052741	1056	3	158161177
Tcf25	0.019574	0.052754	1057	3	123389673
Rab33b	0.0196	0.052803	1058	3	51484528
Gpr65	0.019603	0.052808	1059	2	98275382
Krtap5-2	0.019618	0.052842	1060	1	142175334
Mdh1b	0.019684	0.052991	1061	3	63721603
Xirp2	0.01969	0.053004	1062	3	67511305
Gnao1	0.019718	0.053076	1063	1	93950314
Nmi	0.019748	0.053143	1064	3	51956046
Ankrd26	0.019758	0.053169	1065	3	118559014
Ube2cbp	0.019769	0.053194	1066	3	86451913
Emc10	0.01981	0.053297	1067	3	44492316
Agtr2	0.019813	0.053304	1068	2	21486541
Fgf23	0.019819	0.053314	1069	3	127078165
Hr	0.019821	0.053324	1070	2	70558171
Camk2n2	0.019869	0.053437	1071	3	20621173
Alkbh2	0.019885	0.053478	1072	3	114125575
Fam196a	0.019894	0.053497	1073	2	134918547
Bmp6	0.019919	0.053552	1074	1	38485006
Lrrc8c	0.019955	0.053637	1075	3	105607600
Trim39	0.019959	0.053646	1076	2	36268641
Lacc1	0.019967	0.053662	1077	2	77034985
Furin	0.01997	0.053667	1078	2	80392253
Raph1	0.02002	0.053767	1079	2	60495478
Gm1123	0.020024	0.053776	1080	3	99023248
Agbl3	0.020074	0.053886	1081	3	34799283
Tm4sf4	0.020093	0.053937	1082	2	57425761
Csdc2	0.020171	0.054106	1083	2	81948669
Ebpl	0.020174	0.054115	1084	3	61342177
Cyb561	0.020206	0.054181	1085	3	105937666
Pkd1l3	0.020207	0.054185	1086	2	109636271
Hsf4	0.020221	0.054217	1087	1	105270797
Fsip1	0.020228	0.054233	1088	2	118251770
Ydjc	0.020236	0.054244	1089	2	17147302
Atxn2l	0.020269	0.054312	1090	3	126495366
Shd	0.020269	0.054312	1091	2	55971646
Fsbp	0.020292	0.054362	1092	3	11583802
Klk7	0.020316	0.054409	1093	3	43812994
Cpa2	0.020318	0.054413	1094	2	30552052
Odf1	0.020357	0.054506	1095	3	38219540
4930415L06Rik	0.020371	0.054539	1096	1	89932359
Pddc1	0.020375	0.054547	1097	2	141411800
Unc5d	0.020392	0.054582	1098	3	28719780
Maea	0.020415	0.054627	1099	3	33360504
Klri1	0.020422	0.054644	1100	1	129698921
2019-09-06	0.020429	0.05466	1101	3	36946624
Tex15	0.020523	0.054877	1102	3	33575617
Arsi	0.020534	0.054896	1103	3	60916785
Vmn1r91	0.020572	0.054991	1104	1	20101364
Map7	0.020591	0.05504	1105	3	20261845
Slfn2	0.020622	0.055108	1106	1	83069611
Pstk	0.020624	0.055109	1107	3	131373595
Rplp1	0.020651	0.05516	1108	2	61914374
Vmn1r88	0.020673	0.055208	1109	1	13178070
Megf6	0.0207	0.055269	1110	3	154242427
Gm5464	0.0207	0.055269	1111	3	66869128
Uba1	0.020723	0.055318	1112	1	20675901
Gtf2h3	0.020746	0.055365	1113	2	124584149
Gpc6	0.020773	0.055424	1114	2	117435880
Crygf	0.020823	0.05554	1115	1	65926737
Zfp787	0.020874	0.055645	1116	1	6132790
Cwc15	0.020889	0.055675	1117	3	14503636
Fanca	0.020899	0.055695	1118	2	123291451
Eif4g3	0.020924	0.055756	1119	3	138105337
Rnf182	0.021069	0.056068	1120	3	43668152
Otol1	0.021074	0.056082	1121	3	70026589
Vmn1r124	0.021089	0.056108	1122	3	21260412
Guca2b	0.021098	0.056128	1123	2	119657638
Tmem44	0.021125	0.056192	1124	1	30547398
Nek1	0.021171	0.056299	1125	3	61089760
AI118078	0.021175	0.056307	1126	1	55413875
Cdc34	0.021202	0.056372	1127	2	79685248
Olfr331	0.021227	0.056413	1128	2	58502133
Kif2c	0.021275	0.056524	1129	1	117180597
Bcap29	0.021278	0.05653	1130	3	31624197
Lats1	0.021278	0.05653	1131	3	7702445
Mamld1	0.021286	0.056548	1132	2	71117949
H1f0	0.021294	0.056566	1133	3	79028799
Dab2	0.021325	0.056623	1134	1	6429744
Wwtr1	0.02136	0.056694	1135	3	57501850
Mtus1	0.021375	0.056723	1136	1	41015399
Chac2	0.021416	0.056809	1137	3	30977715
Fam118a	0.021416	0.056811	1138	3	85045652
Npm3	0.021425	0.056826	1139	3	45748845
Ccdc93	0.021426	0.056827	1140	2	121456106
Nek8	0.021476	0.05694	1141	1	78170463
Mrps31	0.021514	0.057037	1142	3	22421353
Ankfy1	0.021518	0.057049	1143	3	72740564
Trpv6	0.021526	0.057066	1144	1	41624606
D630039A03Rik	0.02159	0.057203	1145	3	57915682
Vmn2r29	0.021601	0.057226	1146	1	7240132
Tmem126b	0.021676	0.057399	1147	2	90472697
Akap10	0.021692	0.05743	1148	3	61915258
Nr1d1	0.021727	0.057503	1149	2	98771272
Kdelr3	0.021775	0.057608	1150	3	79524958
Tead4	0.021777	0.057612	1151	2	128270889
Tkt	0.021792	0.057649	1152	3	30566974
Slc44a1	0.021827	0.057728	1153	1	53491504
Rrp1	0.021841	0.057756	1154	3	78412847
Ackr2	0.021854	0.05778	1155	3	121909256
Tas2r139	0.021867	0.057804	1156	3	42141035
Rbm15b	0.021877	0.057829	1157	1	106885423
Txndc8	0.021892	0.057861	1158	3	58009032
Extl1	0.021905	0.057892	1159	3	134363088
Acin1	0.021927	0.057941	1160	2	54646770
Zap70	0.021974	0.058044	1161	3	36771022
Smad3	0.021978	0.05805	1162	2	63667827
Il12rb2	0.022028	0.058161	1163	1	67351248
Fdxr	0.022062	0.058236	1164	2	115270418
Egf	0.022078	0.058274	1165	1	129737469
Krtap4-6	0.022104	0.058334	1166	2	99665670
Upf1	0.022122	0.058373	1167	3	70343396
Fscb	0.022176	0.058502	1168	3	64473692
Ccdc90b	0.022189	0.058532	1169	2	92561608
Tspo2	0.022215	0.058585	1170	3	48449972
Tmed10	0.022228	0.058605	1171	1	85350872
Robo4	0.022232	0.058614	1172	2	37408342
Mars2	0.022257	0.058674	1173	2	55238050
Fopnl	0.022277	0.058717	1174	3	14313913
Serpina1e	0.0223	0.058766	1175	2	103949267
Phf12	0.022317	0.058809	1176	2	78015623
Ceacam1	0.022329	0.058834	1177	1	25476498
Nmnat1	0.022349	0.058891	1178	3	149473435
Lrrc24	0.022379	0.058949	1179	2	76718664
Pnrc2	0.022409	0.059014	1180	3	135872214
Pdp1	0.022429	0.059057	1181	2	11961355
Nudt13	0.022435	0.059065	1182	3	20307789
Pebp1	0.022445	0.059086	1183	2	117285774
Meikin	0.022468	0.059136	1184	3	54394647
Rnase13	0.022479	0.059156	1185	2	51922559
Stoml1	0.022496	0.059196	1186	3	58256675
Casp9	0.022514	0.05923	1187	3	141793973
Nudt10	0.022529	0.059267	1188	2	6172799
Ap3b1	0.022531	0.059271	1189	2	94394789
Wdr3	0.02254	0.05929	1190	2	100154976
Lhfpl2	0.02254	0.05929	1191	3	94191848
Ccdc166	0.022579	0.059377	1192	1	75981602
Snrnp70	0.022591	0.059406	1193	2	45383845
Vps11	0.022614	0.059447	1194	3	44359167
Jmjd6	0.022629	0.059481	1195	2	116842661
Smim9	0.022647	0.059522	1196	2	75161573
Olfr678	0.022647	0.059522	1197	2	105069864
Hp1bp3	0.02268	0.059589	1198	2	138228672
Kifc1	0.02273	0.059708	1199	3	33883599
Csmd3	0.022741	0.059737	1200	3	47970129
Lsm8	0.02278	0.059826	1201	1	18851749
Mog	0.022785	0.059837	1202	2	37017577
Abcc12	0.022785	0.059837	1203	3	86538403
Kif22	0.022791	0.059852	1204	3	127035894
Lancl1	0.02283	0.059925	1205	3	67009276
Kif12	0.02293	0.060122	1206	1	63171421
Itm2c	0.022953	0.060167	1207	2	85903119
Map3k7	0.022983	0.060242	1208	3	31985774
Gm9047	0.023005	0.06029	1209	3	29471802
Psma8	0.023131	0.060574	1210	1	14731081
Atp5s	0.023131	0.060575	1211	2	69740983
Klf11	0.023153	0.060626	1212	2	24655051
Klhl10	0.023181	0.060678	1213	3	100447551
Gas2l2	0.02321	0.060745	1214	3	83422880
Cnr1	0.023231	0.060797	1215	1	33944531
Avpi1	0.02324	0.060809	1216	2	42124981
Tbc1d2b	0.023272	0.060875	1217	3	90270542
2510039O18Rik	0.023279	0.060887	1218	2	147941625
Pck1	0.023281	0.060891	1219	3	173154788
Cpa6	0.023281	0.060892	1220	3	10481069
Ash1l	0.023314	0.060965	1221	2	88982967
Olfr52	0.023357	0.061071	1222	2	86181646
Flad1	0.023393	0.061141	1223	3	89408423
Mrpl57	0.023405	0.061166	1224	2	57826580
Rassf4	0.023406	0.061167	1225	3	116659530
Adra2a	0.023431	0.061215	1226	2	54046540
Btd	0.023442	0.061239	1227	3	31662289
Vmn2r51	0.023449	0.061256	1228	2	10100594
Kctd16	0.023481	0.061335	1229	1	40258934
Nxn	0.023511	0.061394	1230	3	76274605
S1pr2	0.023518	0.061409	1231	3	20968065
Klhl22	0.023528	0.061428	1232	3	17776942
Otud5	0.023532	0.061442	1233	1	7867990
Kiss1r	0.023554	0.061489	1234	3	79918769
Skint3	0.023582	0.061546	1235	1	112255830
Stkld1	0.023603	0.061601	1236	3	26945910
Arhgap44	0.023614	0.061624	1237	3	65038663
Marcksl1	0.023632	0.061659	1238	2	129513900
Pgbd5	0.023659	0.061723	1239	3	124380297
Tmem204	0.023681	0.061778	1240	3	25080459
Mrps2	0.023765	0.061966	1241	3	28469524
Rasa1	0.023782	0.062003	1242	2	85258380
Rcl1	0.023791	0.062015	1243	2	29118295
Raf1	0.023861	0.062167	1244	2	115622984
Olfr503	0.023864	0.062171	1245	3	108545102
Smc6	0.023882	0.062218	1246	1	11279700
Taf6	0.023932	0.062324	1247	2	138182278
Dnajb9	0.023977	0.062429	1248	3	44207380
Defb26	0.023985	0.062442	1249	2	152508232
Fkbp1a	0.024024	0.062531	1250	2	151542851
Fam192a	0.024032	0.06255	1251	2	94588073
Lad1	0.024042	0.062575	1252	3	135827411
Krt8	0.024047	0.062585	1253	3	101999436
Ankrd24	0.024079	0.062649	1254	3	81642638
A930018P22Rik	0.024091	0.062674	1255	3	104122894
Dnph1	0.024133	0.062762	1256	3	46498744
Tmem199	0.024133	0.062763	1257	3	78509755
Zfp367	0.024144	0.062788	1258	2	64145670
Bsnd	0.024206	0.062922	1259	2	106486614
Dennd4a	0.024283	0.063097	1260	2	64896810
Inca1	0.024333	0.063199	1261	1	70690450
Fbxo28	0.024365	0.063267	1262	2	182341360
Dnaja4	0.024374	0.063292	1263	2	54710569
Tmem86b	0.024382	0.063312	1264	3	4628727
Zfp287	0.024383	0.063314	1265	1	62728544
Olfr517	0.024402	0.063345	1266	3	108868623
A530032D15Rik	0.024425	0.063388	1267	3	85099615
Sirpb1b	0.024428	0.063394	1268	2	15543019
Adipoq	0.024469	0.063474	1269	3	23157185
Scarf1	0.024469	0.063474	1270	3	75524006
Rpusd1	0.024477	0.063488	1271	2	25730408
1700001F09Rik	0.024483	0.063502	1272	3	43346732
Hjurp	0.024533	0.06361	1273	1	88270222
Olfr342	0.024549	0.063644	1274	3	36527836
Cypt12	0.024577	0.063699	1275	3	17948657
Zfp474	0.024583	0.063714	1276	3	52638862
1810043G02Rik	0.024588	0.063727	1277	2	77981809
Ptpn5	0.024618	0.063787	1278	3	47082862
Olfr93	0.024623	0.063801	1279	3	37151745
Slc25a22	0.024642	0.063835	1280	2	141433960
Rfxank	0.02466	0.063868	1281	3	70136216
Rad23a	0.024669	0.063896	1282	3	84838031
Lypd5	0.024683	0.063925	1283	2	24352541
Spg20	0.024685	0.063928	1284	3	55121623
H3f3b	0.024783	0.064148	1285	1	116023910
Cspp1	0.024821	0.064224	1286	3	10066730
Orm2	0.024834	0.064249	1287	1	63363017
Fam101b	0.024847	0.064278	1288	3	76024991
Steap4	0.024865	0.064319	1289	2	7976700
Slc45a3	0.024891	0.064374	1290	3	131978840
Zfp786	0.024892	0.064381	1291	2	47821551
Lrif1	0.024909	0.064426	1292	2	106732582
Cd46	0.024918	0.064446	1293	3	195086125
Hykk	0.024919	0.064447	1294	3	54920792
Fndc3b	0.024984	0.064588	1295	3	27459994
Parn	0.025009	0.064646	1296	2	13654522
Gipc1	0.025011	0.064651	1297	3	83662003
Bnip1	0.025086	0.064811	1298	3	26781154
Hnrnpk	0.025134	0.064911	1299	1	58394574
Spns3	0.025184	0.06502	1300	1	72537258
Cyp4b1	0.025234	0.065136	1301	2	115641852
Glt8d1	0.025235	0.065137	1302	3	31008822
Ddx50	0.025284	0.065237	1303	1	62646922
Ppfia1	0.025319	0.065324	1304	3	144500289
Edrf1	0.025325	0.065334	1305	2	133657098
Ntf5	0.025334	0.065359	1306	3	45415761
Olfr206	0.025357	0.065407	1307	3	59345117
Ifna6	0.025361	0.065415	1308	2	88827604
Tmbim7	0.025384	0.065455	1309	2	3661846
Pomt1	0.025399	0.06549	1310	3	32250492
Pus10	0.025413	0.065516	1311	3	23717583
Adgrf5	0.025434	0.06556	1312	3	43441976
Ppp1r12a	0.025533	0.065782	1313	2	108241234
Rbl2	0.025534	0.065784	1314	1	91106301
Fgl1	0.025542	0.065803	1315	2	41209811
Ifna14	0.025549	0.065819	1316	3	88571461
Snx21	0.025584	0.065886	1317	1	164791791
LOC100862015	0.025592	0.065899	1318	3	73640134
Olfr1023	0.025606	0.065928	1319	2	85887350
Sox7	0.025684	0.066098	1320	1	63943970
Olfr481	0.025734	0.066197	1321	1	108081371
Gtf2h1	0.025783	0.066292	1322	2	46808875
Lrp4	0.025819	0.066385	1323	3	91480785
Hist3h2a	0.025834	0.066413	1324	1	58954861
Ost4	0.02587	0.06648	1325	2	30907499
Klhl31	0.025883	0.066511	1326	2	77650390
Rad50	0.025884	0.066514	1327	1	53698140
Eif4e3	0.025897	0.066545	1328	2	99639203
Msmo1	0.025906	0.066563	1329	2	64723656
Pou3f4	0.025925	0.066595	1330	2	110814653
Cpxm2	0.025938	0.066623	1331	2	132059907
Dhx36	0.026004	0.066765	1332	3	62506772
Actr1b	0.026034	0.066826	1333	3	36706875
Itpr1	0.026066	0.066891	1334	3	108386834
Alg6	0.026071	0.066905	1335	3	99741564
Atp6v0d2	0.026084	0.066935	1336	1	19888749
Pkn3	0.026133	0.067051	1337	3	30080798
Zfp784	0.026184	0.067172	1338	1	5036253
Zfp616	0.026199	0.067203	1339	2	74083198
Scn8a	0.026213	0.067237	1340	2	100983787
Slc1a6	0.026255	0.067323	1341	2	78795954
Camk2a	0.026269	0.067352	1342	3	60951293
Coprs	0.026282	0.067378	1343	2	13890187
Ctla4	0.026319	0.067467	1344	3	60912488
4930562C15Rik	0.026327	0.067483	1345	3	4850451
Celsr1	0.026346	0.067522	1346	2	86030888
Chchd3	0.026365	0.067568	1347	2	33060020
Rundc3a	0.026382	0.067604	1348	3	102397679
Rtn2	0.026384	0.06761	1349	1	19286761
Pla2g2d	0.026411	0.067668	1350	3	138778697
Tmx1	0.02642	0.067692	1351	2	70460521
Rgs12	0.026434	0.06772	1352	2	34965937
St8sia3	0.026459	0.06777	1353	3	64265625
Myl2	0.026475	0.0678	1354	2	122103887
Ppp4r1	0.026534	0.067921	1355	1	65815969
Cradd	0.026545	0.067946	1356	3	95175905
Iqsec1	0.026584	0.068038	1357	2	90690292
Cybb	0.026634	0.068154	1358	2	9453669
Chst11	0.026684	0.068268	1359	2	83191210
1700013F07Rik	0.026716	0.068339	1360	3	108543443
Arl6ip5	0.026727	0.068363	1361	3	97229575
Dmrtc1b	0.026727	0.068363	1362	3	102711405
Cd177	0.026734	0.068383	1363	2	24759679
Ccdc8	0.026739	0.068392	1364	3	16995092
En1	0.026751	0.068412	1365	3	120603581
Mapkbp1	0.026771	0.068455	1366	3	120017790
Mut	0.026778	0.068466	1367	3	40938558
Gpr156	0.026784	0.068485	1368	3	37948268
Fam177a	0.026808	0.068536	1369	2	55130658
Izumo3	0.02687	0.068655	1370	3	92145657
Olfr1311	0.026884	0.068691	1371	2	112021756
Esm1	0.026892	0.06871	1372	3	113209916
Nsun5	0.026955	0.068849	1373	3	135371360
Lingo2	0.026984	0.068897	1374	1	35709066
Lipk	0.026999	0.068927	1375	3	34021655
Ddx42	0.027034	0.069003	1376	1	106231267
Brpf3	0.027069	0.069077	1377	2	28806823
Gtf2a1	0.027084	0.069107	1378	3	91567848
2700094K13Rik	0.027134	0.069211	1379	2	84670294
BC029214	0.027162	0.06928	1380	2	25460476
Lpgat1	0.027211	0.069389	1381	3	191749591
4931431F19Rik	0.027219	0.069408	1382	3	104128696
Fam195b	0.027226	0.069426	1383	3	120544776
Lepr	0.027234	0.069438	1384	2	101779945
Ddx6	0.027253	0.069475	1385	3	44626407
Cox5a	0.027284	0.069538	1386	1	57521362
Chchd4	0.027295	0.069566	1387	3	91465301
Syne1	0.027311	0.069605	1388	2	5360745
Trpm5	0.027327	0.069629	1389	3	143081866
Clrn1	0.027334	0.069648	1390	3	58884945
Myo9b	0.027349	0.069675	1391	2	71330761
Hnrnpu	0.027358	0.06969	1392	2	178337390
Skiv2l	0.027434	0.069849	1393	2	34846037
Pcdhgb2	0.027443	0.069864	1394	2	37690106
Flnc	0.027445	0.069868	1395	3	29441494
Vmn2r120	0.027489	0.069974	1396	2	57524896
Timm8a1	0.027516	0.070027	1397	3	134538261
Hlcs	0.027523	0.070045	1398	3	94262690
Hdac2	0.027555	0.070113	1399	2	36986351
Cryz	0.02756	0.070121	1400	3	154606434
Tmem14c	0.027583	0.070177	1401	2	41021137
Trpc6	0.027625	0.070278	1402	3	8643520
Pxt1	0.027633	0.070297	1403	1	28941259
Olfr311	0.027659	0.070345	1404	3	58841558
Dpm2	0.027677	0.070386	1405	3	32571244
Stk32a	0.027683	0.070403	1406	2	43305088
Cmtm1	0.027684	0.070404	1407	3	104309665
Mgst1	0.027689	0.070419	1408	3	138147811
Atg2b	0.027714	0.07047	1409	3	105663929
Pex19	0.027733	0.070511	1410	2	172130728
Ccnjl	0.027783	0.070629	1411	1	43556739
Scgb2b12	0.0278	0.070673	1412	3	32326685
B4galt3	0.0278	0.070673	1413	3	171274282
Igfals	0.027819	0.07071	1414	2	24880861
Fth1	0.027833	0.070739	1415	1	9982970
Commd9	0.027848	0.070772	1416	3	101895212
H2-M9	0.027883	0.070845	1417	1	36642189
Sh3yl1	0.027933	0.070943	1418	2	30940313
Agmo	0.02796	0.070997	1419	2	37402132
Tmem256	0.027967	0.071013	1420	3	69839237
Ints3	0.027983	0.071052	1421	1	90411289
Frmd8	0.028045	0.071183	1422	2	5869540
Hsd17b12	0.028083	0.071261	1423	2	94115061
Stx3	0.028083	0.071262	1424	2	11791815
Olfr705	0.028114	0.071326	1425	3	106873751
Fam134c	0.028114	0.071326	1426	3	101101000
Msantd2	0.028131	0.071357	1427	2	37489455
Hyou1	0.028133	0.07136	1428	1	44381324
Fbxo18	0.028233	0.071563	1429	3	11767428
Pus7l	0.028282	0.071678	1430	3	94540841
Lrat	0.028317	0.071755	1431	3	82903576
Tm6sf1	0.028332	0.071788	1432	2	81870750
Akr1c13	0.028357	0.071844	1433	3	4197830
Fnip2	0.028372	0.071876	1434	3	79492847
Hpse2	0.028382	0.071896	1435	2	43384786
H1foo	0.028392	0.071918	1436	3	115947776
Serpinf2	0.0284	0.071934	1437	3	75433288
Mgat5b	0.028435	0.068138	1438	2	116968435
Nova2	0.028458	0.072056	1439	3	18950478
Gm11563	0.028482	0.072092	1440	2	99658599
Mdfic	0.028501	0.07213	1441	2	15770333
Macrod2	0.02853	0.072194	1442	2	141515319
Mex3a	0.028582	0.072315	1443	2	88532795
Pcx	0.028616	0.072393	1444	3	4619094
4933413G19Rik	0.028624	0.072407	1445	3	128379455
Cplx4	0.028632	0.072421	1446	3	65969915
Tbcel	0.028649	0.072463	1447	2	42442847
Prl7d1	0.028682	0.072542	1448	3	27712047
Wibg	0.028713	0.072608	1449	3	128765176
Nanos1	0.028736	0.072657	1450	3	60756404
Arhgap35	0.028757	0.072709	1451	1	16563744
Nphs2	0.028809	0.072834	1452	3	156323737
Map10	0.028827	0.07288	1453	3	125671113
Prss51	0.028831	0.072887	1454	3	64096068
Mrpl40	0.028831	0.072888	1455	2	18875329
Ankar	0.028906	0.073044	1456	3	72688611
Aco1	0.028906	0.073044	1457	2	40178976
Cd209d	0.028944	0.073125	1458	3	3876265
B020031M17Rik	0.029018	0.073293	1459	2	119949966
Kpna2	0.02903	0.073316	1460	3	106991074
Fcamr	0.029081	0.073431	1461	2	130804627
Parva	0.029115	0.073509	1462	3	112572905
Olfr742	0.02914	0.073571	1463	3	50515301
Xpr1	0.029148	0.073593	1464	2	155313310
Phf10	0.029172	0.073651	1465	2	14954076
Dclk1	0.029181	0.073668	1466	2	55487825
Prp2	0.029224	0.07376	1467	3	132600315
Selenbp2	0.029231	0.073774	1468	3	94700027
Tnrc6a	0.029253	0.073819	1469	3	123171538
Tle3	0.029259	0.073831	1470	2	61410006
Havcr2	0.029306	0.073928	1471	3	46456330
Ccpg1os	0.02933	0.073979	1472	2	72980151
Snrpd1	0.029332	0.073981	1473	3	10626927
Nedd4	0.029342	0.074008	1474	3	72721563
Stxbp4	0.029355	0.07403	1475	3	90575329
Ccdc94	0.02938	0.074079	1476	1	55960804
Rsg1	0.029408	0.074141	1477	2	141217288
Mafb	0.02943	0.074184	1478	3	160366433
Btla	0.029447	0.074227	1479	2	45239073
Kcnh3	0.029471	0.074286	1480	3	99232903
Mzt1	0.029481	0.074308	1481	2	99046012
Olfr978	0.029497	0.074344	1482	3	39994416
Errfi1	0.02953	0.074417	1483	1	150866449
Tmem18	0.029563	0.074488	1484	2	30584553
Pex2	0.029576	0.074524	1485	3	5561417
Rnf5	0.02961	0.074593	1486	3	34603340
Serpina11	0.02963	0.074634	1487	2	103986305
Gjd4	0.029679	0.074736	1488	1	9280784
Klk15	0.029714	0.07481	1489	2	43937478
Ptpn7	0.029729	0.074846	1490	1	135137324
Il18bp	0.029744	0.07488	1491	3	102016858
Hdac10	0.029762	0.074921	1492	3	89127959
Serpina7	0.029779	0.074962	1493	1	139082107
Olfr1084	0.029821	0.07505	1494	2	86639592
Lce1h	0.029829	0.075061	1495	1	92763584
Hspa5	0.02985	0.075104	1496	3	34772582
Vmn2r23	0.029859	0.075129	1497	2	123729551
Olfr307	0.029869	0.075148	1498	3	86336303
Sult1c2	0.029879	0.075172	1499	1	53832145
Sash3	0.029979	0.075385	1500	1	48159148
4933434E20Rik	0.030028	0.075498	1501	3	90056578
Olfr933	0.030048	0.075545	1502	3	38976230
Ap3s1	0.0301	0.075646	1503	3	46754371
Trim60	0.030173	0.075804	1504	3	65000929
Lgals7	0.03022	0.075912	1505	2	28865584
Gtf2ird2	0.030254	0.07599	1506	3	134192717
Gpr50	0.030269	0.076021	1507	3	71667271
Pogz	0.030278	0.07604	1508	2	94870139
Sphkap	0.030288	0.076056	1509	3	83278711
Napb	0.030327	0.076137	1510	1	148732278
Ly6g6f	0.030377	0.076253	1511	2	35082956
Trim45	0.030377	0.076253	1512	1	100923157
Mrps34	0.030427	0.076364	1513	2	24895837
Gm1993	0.030477	0.076464	1514	2	25563458
Gm4894	0.03048	0.076472	1515	2	49268659
Abi3	0.030516	0.076552	1516	3	95833785
Fbxo8	0.030527	0.076573	1517	2	56569299
Copz2	0.030535	0.076592	1518	3	96849929
Col4a4	0.030544	0.07661	1519	2	82495772
Tbc1d25	0.030554	0.07663	1520	2	8156344
Itih4	0.030577	0.076673	1521	1	30890741
Chd1l	0.030642	0.076828	1522	2	97583902
Olfr203	0.030698	0.07695	1523	3	59303283
Smpx	0.030709	0.076968	1524	3	157714619
Atp6v1f	0.030721	0.076995	1525	2	29467839
Zfp414	0.030726	0.077002	1526	1	33630416
Serpinb9g	0.030741	0.077034	1527	2	33486655
Wfdc12	0.030756	0.077068	1528	3	164190214
Insrr	0.030776	0.077107	1529	2	87808595
Dpys	0.03081	0.077168	1530	2	39857177
Pigv	0.030849	0.077254	1531	2	133665745
Vwc2	0.030876	0.077318	1532	2	11116268
Tsc1	0.030909	0.07739	1533	2	28675238
Gm11569	0.030919	0.077413	1534	2	99798802
Hemgn	0.030925	0.077432	1535	1	46396383
Naa40	0.030953	0.077508	1536	2	7234143
Radil	0.030975	0.077548	1537	1	142494945
Naaa	0.030998	0.077597	1538	3	92276998
Mastl	0.031025	0.077665	1539	1	23133094
Aldh3b2	0.031058	0.077729	1540	3	3977551
Reg3d	0.031125	0.077873	1541	1	78377148
Krtap4-16	0.031135	0.077897	1542	3	99851515
Pinx1	0.031136	0.077899	1543	3	63864257
Mib2	0.031162	0.077959	1544	3	155661208
Olfr1148	0.031174	0.077985	1545	1	87833615
Acaa1b	0.031206	0.078039	1546	2	119149720
Bmp4	0.031224	0.078084	1547	3	46385841
2210407C18Rik	0.031306	0.078251	1548	3	58612583
Rhcg	0.031325	0.078296	1549	2	79599730
Mthfd2l	0.031374	0.078394	1550	1	90946896
Fam173b	0.031385	0.078418	1551	3	31605976
Nars	0.031423	0.078497	1552	2	64507825
Rhpn1	0.031444	0.078543	1553	3	75710680
Bves	0.031453	0.078557	1554	3	45346263
Wdr26	0.031493	0.078643	1555	3	181197699
Catsperd	0.031523	0.078707	1556	3	56650773
Nwd2	0.031525	0.078714	1557	3	63800565
Tcaf1	0.031536	0.078735	1558	3	42677482
Ruvbl2	0.031573	0.07881	1559	2	45428758
Tmem116	0.031579	0.078822	1560	3	121491208
Ispd	0.031584	0.07883	1561	3	36381899
3110057O12Rik	0.031659	0.078978	1562	2	40905944
Sypl	0.031672	0.079013	1563	1	32954356
Gtf2a1l	0.031686	0.079037	1564	3	88694248
Tnfrsf11a	0.031722	0.079105	1565	1	105827001
Hist4h4	0.031767	0.079188	1566	3	136804189
4933402D24Rik	0.031772	0.079194	1567	1	63768497
Vapa	0.031784	0.079222	1568	2	65594963
Cdkn1b	0.031822	0.079309	1569	1	134921149
Olfr157	0.031844	0.079349	1570	2	43836257
Olfr317	0.031872	0.079404	1571	2	58732646
Bhlhe41	0.031881	0.079422	1572	3	145863645
Cic	0.031884	0.07944	1573	3	25289478
Smim7	0.031908	0.079478	1574	3	72570901
Wfdc5	0.03192	0.073306	1575	2	164178873
Tigar	0.031921	0.079512	1576	2	127092636
Deaf1	0.031971	0.079618	1577	1	141310944
6430573F11Rik	0.031981	0.079637	1578	3	36511828
Ltc4s	0.032009	0.079697	1579	2	50238395
Fosb	0.032021	0.079714	1580	2	19306564
Fbxw15	0.032059	0.079799	1581	3	109566773
Nme2	0.032059	0.0798	1582	2	93955496
Olfr920	0.032115	0.079915	1583	2	38755973
1700019L03Rik	0.03212	0.079929	1584	2	32779933
Ppp2cb	0.03212	0.079929	1585	1	33611777
Zfp748	0.03222	0.080162	1586	1	67541504
F7	0.032225	0.080171	1587	3	13034039
Anxa4	0.032235	0.080199	1588	3	86753842
Ptgis	0.032265	0.080258	1589	2	167225400
Efcab3	0.03227	0.080266	1590	2	105106384
Helt	0.032301	0.080352	1591	2	46293192
Ddx39	0.032319	0.080391	1592	1	83720636
Rpsa	0.032336	0.080427	1593	2	120130158
Vps18	0.032369	0.08049	1594	1	119293420
Rasa4	0.032419	0.080586	1595	2	136102541
Rnf41	0.032445	0.080638	1596	3	128435433
Bcl6b	0.032469	0.080698	1597	1	70227719
Arnt	0.032472	0.080704	1598	2	95488389
Clec4a1	0.032475	0.080711	1599	3	122930786
Xdh	0.032566	0.080907	1600	3	73906280
Krtap2-4	0.032568	0.080912	1601	2	99614669
St13	0.032607	0.080988	1602	3	81374804
Habp4	0.032619	0.081018	1603	2	64170074
Tmem165	0.032674	0.081134	1604	2	76204201
Phtf2	0.032686	0.081163	1605	3	20803321
Gm14920	0.032718	0.081242	1606	3	117014888
Olfr350	0.03272	0.08125	1607	2	36850395
Fam49b	0.032746	0.081308	1608	3	63950011
Cyr61	0.032767	0.081351	1609	1	145649318
Rdm1	0.032771	0.081358	1610	2	101630257
Tmem221	0.032785	0.081389	1611	3	71558643
Lmntd2	0.032817	0.081462	1612	2	141211543
Ffar2	0.032867	0.081559	1613	1	30819881
Gm8909	0.032882	0.081593	1614	2	36167548
Zfp715	0.032916	0.081667	1615	2	43299686
Elfn1	0.032918	0.081669	1616	3	139972831
Hsp90b1	0.032936	0.081717	1617	3	86694485
Adamtsl5	0.032953	0.081753	1618	2	80342136
1700066B19Rik	0.032966	0.081786	1619	1	35728560
Ak4	0.032994	0.08184	1620	3	101460612
Hey1	0.033016	0.081882	1621	2	8664907
Olfr160	0.033065	0.081981	1622	2	37712166
Olfr891	0.033066	0.081981	1623	2	38180345
Pdgfc	0.033082	0.082018	1624	3	81204365
Csnk1e	0.033096	0.082047	1625	3	79426444
Zfp385c	0.033115	0.082094	1626	3	100630700
Hs3st1	0.03316	0.082189	1627	3	39615175
Lce3a	0.033165	0.08221	1628	2	92925677
Foxd1	0.033165	0.08221	1629	3	98354804
Olfr469	0.033177	0.082228	1630	2	107823199
Acsm3	0.033193	0.082261	1631	3	119775224
Defb34	0.033201	0.082285	1632	3	19126388
Wdr43	0.033218	0.082318	1633	2	71638469
Rassf3	0.033228	0.082334	1634	3	121416162
Ckap2l	0.033254	0.082383	1635	3	129285350
Tubb4a	0.033337	0.08258	1636	3	57086299
Olfr497	0.033351	0.082606	1637	2	108422653
Pla2g2e	0.033389	0.082693	1638	2	138880480
Ikzf5	0.033393	0.082698	1639	3	131396674
Qpct	0.033404	0.082724	1640	3	79070850
1700016H13Rik	0.033438	0.082794	1641	3	103649543
Olfr1348	0.033464	0.082861	1642	1	6501710
Hbegf	0.033563	0.08305	1643	1	36515249
Bmyc	0.033576	0.083072	1644	2	25707177
Prokr2	0.033612	0.083145	1645	2	132381226
Gpr45	0.033613	0.08315	1646	1	43032791
Olfr123	0.033662	0.083249	1647	2	37796008
Methig1	0.033673	0.083273	1648	2	100353682
Wnt6	0.033705	0.083343	1649	3	74772215
Pdlim4	0.033712	0.08335	1650	1	54055937
Hmcn1	0.033761	0.083462	1651	2	150657121
9030617O03Rik	0.033762	0.083465	1652	2	100850311
Olfr691	0.033771	0.083487	1653	2	105337608
Gm21975	0.0338	0.083541	1654	3	79516628
Slc23a2	0.033811	0.083566	1655	2	132077434
Lce1k	0.033861	0.08367	1656	1	92806759
Klhl26	0.033935	0.083849	1657	2	70452129
Prkcg	0.033946	0.083872	1658	3	3310946
Mmrn2	0.033961	0.083898	1659	1	34398640
Olfr600	0.034038	0.08407	1660	2	103346319
Rnase12	0.03406	0.084116	1661	1	51057074
Mphosph8	0.034069	0.084139	1662	3	56674480
Ndufaf1	0.034075	0.076504	1663	2	119660235
Pbx2	0.034075	0.084152	1664	3	34594029
Fbxw7	0.034103	0.084214	1665	3	84952494
Xylb	0.034128	0.084259	1666	3	119359306
Zfp202	0.034142	0.084292	1667	2	40209874
Gabra6	0.034145	0.0843	1668	3	42317457
Cmtm6	0.034159	0.084332	1669	2	114737331
Asb5	0.034165	0.084349	1670	3	54584696
Smtn	0.034182	0.084387	1671	3	3526397
Cdkn1c	0.034209	0.084434	1672	2	143460188
Nacc2	0.034214	0.084443	1673	2	26090289
Lmo3	0.034216	0.084451	1674	3	138416455
Wdr81	0.034328	0.084697	1675	2	75451037
Frmpd3	0.034358	0.084753	1676	1	140391449
Ywhah	0.034369	0.084779	1677	2	33026663
Lmod2	0.034408	0.084866	1678	2	24603866
Clic6	0.034442	0.084931	1679	2	92499436
Dst	0.034448	0.084943	1680	3	34191469
Mcpt4	0.034507	0.08507	1681	3	56061653
Ybx1	0.034514	0.085083	1682	2	119285135
Emid1	0.034524	0.085099	1683	3	5144392
Cdip1	0.034557	0.085163	1684	1	4768988
Polr1d	0.034607	0.08526	1685	1	147078766
Slc25a2	0.034623	0.085293	1686	3	37638392
Hbb-y	0.034654	0.08536	1687	3	103852889
Itga6	0.034685	0.085418	1688	3	71827919
Cbx5	0.034706	0.085463	1689	1	103213116
Cldn12	0.034714	0.085483	1690	3	5508274
Mib1	0.034784	0.085625	1691	3	10792996
Cyp4f40	0.034826	0.085715	1692	2	32659593
Lancl3	0.03484	0.085745	1693	3	9200735
Resp18	0.034851	0.085768	1694	3	75278207
Hn1	0.034855	0.085775	1695	1	115502090
Cacna1b	0.034885	0.085851	1696	3	24679047
Adora2b	0.034888	0.085859	1697	3	62265093
Chgb	0.034891	0.085862	1698	3	132792995
Nr4a2	0.034905	0.085889	1699	2	57111721
9230110C19Rik	0.034954	0.08599	1700	1	8042723
Chd5	0.034991	0.086064	1701	3	152363292
Npy6r	0.034991	0.086064	1702	3	44275857
Commd7	0.035004	0.086088	1703	2	153628476
Ccdc157	0.035034	0.086154	1704	3	4147760
Slc34a2	0.03504	0.086167	1705	2	53058441
Adgrg1	0.035053	0.086192	1706	2	95005862
Gpr85	0.035054	0.086193	1707	3	13836514
Vmn1r204	0.035076	0.086258	1708	2	22556579
Fam21	0.035103	0.086309	1709	2	116219996
Enoph1	0.035106	0.086314	1710	3	100040298
Muc20	0.035108	0.086319	1711	2	32794651
Vps25	0.035153	0.086429	1712	2	101254042
Fam136a	0.03516	0.086446	1713	3	86366610
H2-DMb2	0.035172	0.086469	1714	3	34147838
Kcnq4	0.035176	0.086476	1715	3	120716552
Atf2	0.035196	0.08653	1716	3	73846343
Krtap17-1	0.035212	0.086562	1717	2	99993806
Tas2r118	0.035232	0.086605	1718	3	23969811
Lyg1	0.035252	0.086651	1719	1	37950662
Rab3c	0.035289	0.086736	1720	3	110181049
Gm16381	0.035289	0.086736	1721	3	87644377
Cyp26a1	0.035302	0.086759	1722	2	37699185
Gpr152	0.035315	0.08679	1723	3	4142542
Cyp4f14	0.035348	0.086859	1724	2	32914588
Focad	0.035358	0.086883	1725	3	88303501
Nicn1	0.03539	0.086946	1726	3	108293389
Rnf181	0.035401	0.086973	1727	3	72362272
Gsg1	0.035464	0.087099	1728	2	135242144
Atp6v1g2	0.035471	0.087112	1729	3	35237177
Rora	0.035497	0.087159	1730	3	69364297
Pnma2	0.03555	0.087269	1731	1	66916547
Serpinc1	0.035569	0.087297	1732	2	160989487
Sbds	0.0356	0.087361	1733	2	130255298
Ccer1	0.035615	0.087391	1734	3	97693939
Casc3	0.035699	0.087564	1735	3	98823302
Klrb1f	0.035708	0.087589	1736	3	129053756
Dkk3	0.035737	0.087641	1737	2	112158320
Prkaa1	0.035749	0.087659	1738	1	5160675
Fam69a	0.035757	0.087678	1739	3	107910188
Adad1	0.03579	0.087744	1740	2	37064300
Zbtb1	0.035798	0.087767	1741	1	76386415
Gm4847	0.035818	0.087804	1742	3	166640084
Olfr1387	0.035842	0.087859	1743	2	49459938
Gm3488	0.035848	0.087871	1744	2	5516399
Pm20d1	0.035876	0.087926	1745	3	131801136
Mfng	0.035937	0.088063	1746	3	78766908
Krt75	0.035947	0.088085	1747	2	101571682
Lcn2	0.035957	0.088101	1748	3	32387581
Olfr1107	0.035975	0.088135	1749	3	87072007
Psmb2	0.035997	0.088185	1750	1	126677810
Hnrnpa1	0.036027	0.088251	1751	3	103242294
Trpc3	0.036043	0.08829	1752	2	36662894
Myo5b	0.036046	0.088294	1753	1	74634509
Lrrc57	0.036054	0.088304	1754	2	120608735
Capza1	0.036074	0.088352	1755	3	104842680
4932418E24Rik	0.036096	0.088404	1756	1	26289769
Nepn	0.036106	0.088424	1757	2	52400731
Gpr89	0.036145	0.088499	1758	2	96890882
Myot	0.036195	0.088619	1759	2	44337079
Sh3bgrl	0.036199	0.088623	1760	3	109150049
Vps8	0.036208	0.088642	1761	3	21461431
Serpinb7	0.036243	0.088721	1762	3	107450212
Olfr457	0.036292	0.088823	1763	3	42472085
Nkx6-2	0.036294	0.088825	1764	2	139582010
Arl11	0.036307	0.088853	1765	3	61310873
Marveld1	0.036316	0.088873	1766	3	42147974
Rasgef1a	0.036345	0.088923	1767	3	118086219
Skint6	0.036394	0.08903	1768	1	113156481
Ctrl	0.036458	0.080031	1769	2	105933199
Tmc5	0.036462	0.089179	1770	3	118642308
Gm12695	0.036493	0.089249	1771	1	96769757
Tlr8	0.036509	0.089287	1772	2	167244883
Vmn2r89	0.036541	0.08935	1773	2	51456148
Mif4gd	0.036542	0.08935	1774	3	115609613
Fbxl18	0.036552	0.089376	1775	2	142886767
Rsu1	0.036553	0.08938	1776	3	13219104
Decr2	0.036573	0.089427	1777	2	26087412
Iqcf1	0.036592	0.089468	1778	1	106501848
Zfp397	0.036626	0.089536	1779	2	23956693
Fzd10	0.036627	0.089537	1780	3	128601405
Tmco2	0.036642	0.089564	1781	1	121109030
Chp2	0.036647	0.08957	1782	3	122220737
Rpusd2	0.036674	0.08963	1783	3	119035431
Lamtor1	0.03668	0.089641	1784	2	101909798
Trh	0.036691	0.08967	1785	1	92242982
Stab2	0.036741	0.089756	1786	2	86933398
Hps6	0.036753	0.089783	1787	3	46004513
S100pbp	0.036776	0.089836	1788	2	129182371
Prkra	0.03679	0.089865	1789	1	76647148
Plxnb2	0.036834	0.089967	1790	2	89164260
Ltbp4	0.036863	0.09002	1791	3	27322135
Gpc1	0.036882	0.090063	1792	2	92854990
Srsf3	0.037088	0.090499	1793	1	29038496
Gnaz	0.037179	0.090699	1794	3	74991863
Hlx	0.037187	0.090708	1795	2	184731666
Gm13088	0.037198	0.090731	1796	2	143655838
Arrdc2	0.037209	0.090756	1797	3	70837165
Tfap2a	0.037225	0.090789	1798	3	40723132
Stmnd1	0.037237	0.090822	1799	1	46273875
Gm4763	0.037241	0.09083	1800	2	24724195
Jarid2	0.03728	0.090907	1801	3	44906576
Gpnmb	0.037286	0.090921	1802	1	49042828
Wrap53	0.037307	0.090956	1803	3	69563860
Defb8	0.037307	0.090956	1804	3	19445942
Gdf7	0.037332	0.091017	1805	2	8301719
Cyfip1	0.037334	0.091022	1806	3	55887887
Nrxn3	0.037336	0.091024	1807	3	89512062
A530099J19Rik	0.037385	0.091129	1808	2	19729772
Fam193b	0.037439	0.091228	1809	2	55550276
Anxa11	0.037492	0.091339	1810	3	25870146
Sft2d2	0.03752	0.091396	1811	2	165187991
Lmbr1	0.037534	0.091423	1812	2	29263464
2310036O22Rik	0.037536	0.091427	1813	2	85027008
Rp9	0.037536	0.091428	1814	3	22458720
Fut1	0.037683	0.091709	1815	1	45619303
Arhgap6	0.037686	0.091717	1816	3	168796800
Pla2g4c	0.037687	0.091718	1817	2	13330021
Mrps6	0.037735	0.09182	1818	2	92099695
Syap1	0.03777	0.091886	1819	3	162863159
Neto1	0.037831	0.092021	1820	1	86473676
Trak1	0.037848	0.09206	1821	3	121443655
Dmrt3	0.037848	0.09206	1822	3	25622439
Antxrl	0.037881	0.092127	1823	2	34060564
6030419C18Rik	0.037913	0.092183	1824	2	58499237
Olfr1414	0.03793	0.092219	1825	2	92511447
Evl	0.038021	0.092406	1826	3	108652924
Prrt4	0.038029	0.092421	1827	2	29171198
Nr1h2	0.03804	0.092445	1828	3	44552585
Cdv3	0.038076	0.092519	1829	3	103365281
Pvrl3	0.038079	0.092524	1830	1	46458898
Cars	0.038119	0.092611	1831	2	143570600
Nop56	0.038129	0.092631	1832	1	130276848
Tmprss5	0.038161	0.092706	1833	3	49113196
Armt1	0.038206	0.092795	1834	3	4434875
Hoxb13	0.038228	0.092837	1835	3	96194923
Kansl1l	0.038251	0.092882	1836	3	66773506
Edar	0.038257	0.092892	1837	3	58607456
Lhcgr	0.038305	0.092987	1838	3	88765026
Vmn1r66	0.038336	0.093042	1839	3	10274897
Fis1	0.038358	0.093091	1840	2	136963096
Olfr1115	0.038396	0.09318	1841	3	87252533
Ndufb6	0.038401	0.09319	1842	3	40277689
Tex101	0.038451	0.093309	1843	3	24669882
Hist1h3a	0.038466	0.093341	1844	2	23762302
Pak6	0.038469	0.093344	1845	3	118689742
Gm813	0.038475	0.093354	1846	1	58614680
Rnasek	0.038499	0.093408	1847	2	70238972
Tnfrsf1a	0.03855	0.093512	1848	3	125357437
Adamts10	0.03855	0.093512	1849	1	33538708
Scn2b	0.038566	0.09354	1850	3	45125513
Brix1	0.038624	0.093674	1851	2	10478718
Ormdl1	0.038642	0.093709	1852	3	53299035
Hils1	0.038672	0.093776	1853	3	94967993
Tmem63a	0.038673	0.093777	1854	2	180960443
Ubr3	0.038684	0.093802	1855	2	69945118
Sfi1	0.038695	0.09382	1856	3	3160125
Srsf1	0.038717	0.093859	1857	2	88048014
Apbb1ip	0.038728	0.093884	1858	2	22866987
Lrrc69	0.03873	0.093889	1859	3	14775070
Grpel2	0.038742	0.093918	1860	3	61726245
Bcl2l14	0.038798	0.09403	1861	2	134427329
Tnfsf15	0.038798	0.09403	1862	3	63744955
Gstm4	0.038803	0.094039	1863	3	108042385
Traf1	0.038831	0.094093	1864	3	34948474
H2afy2	0.038871	0.09418	1865	2	61757825
Apol8	0.03888	0.094201	1866	2	77749739
Slc6a7	0.038885	0.094209	1867	3	61005806
Rad18	0.038921	0.094286	1868	2	112681406
Crls1	0.038924	0.094292	1869	2	132847121
Serpinb9d	0.038957	0.094354	1870	2	33194691
Olfr23	0.038962	0.09436	1871	3	73940670
Zfp446	0.038979	0.0944	1872	2	12979048
Tnpo1	0.039039	0.094519	1873	2	98863826
Ttbk1	0.039069	0.094591	1874	3	46477468
Srxn1	0.039119	0.094691	1875	2	152105859
Wfdc3	0.039143	0.094733	1876	2	164734188
Pigk	0.039154	0.094758	1877	2	152744497
Cyp2c39	0.039168	0.094787	1878	2	39513228
Rhov	0.039198	0.094835	1879	3	119270951
Cog6	0.039218	0.094878	1880	2	53000507
Kcng1	0.039231	0.0949	1881	2	168269058
Stard3	0.039242	0.094928	1882	2	98376500
Cnpy1	0.039253	0.094949	1883	2	28207332
Hsbp1	0.039267	0.094988	1884	1	119344619
Cypt1	0.039368	0.095213	1885	2	16523018
Vmn2r44	0.039416	0.09532	1886	2	8380105
Ddit3	0.039465	0.095428	1887	2	127295435
Chpt1	0.039515	0.095538	1888	1	88503755
Cul4a	0.03956	0.095636	1889	2	13133738
Mrpl15	0.039564	0.095645	1890	2	4782600
Gfi1	0.039569	0.095657	1891	3	107721381
Gnb1	0.039593	0.095706	1892	2	155543151
Cd300ld	0.039594	0.095707	1893	3	114987308
Arap3	0.039604	0.095732	1894	2	37990787
Nmt1	0.039614	0.09575	1895	1	103046464
Gp6	0.039648	0.095829	1896	2	4394276
Ube2s	0.039663	0.095866	1897	2	4811418
1300017J02Rik	0.039693	0.095914	1898	3	103277490
Olfr698	0.039705	0.095938	1899	3	106752942
Klhl17	0.039721	0.09598	1900	3	156232224
Taar1	0.03977	0.096088	1901	2	23920840
Sh2b3	0.039812	0.096178	1902	1	121828515
Olfr1282	0.039861	0.096288	1903	1	111335794
Rfpl4	0.03988	0.096328	1904	3	5110745
Slc7a11	0.039906	0.096393	1905	3	50438850
Aars	0.039906	0.096393	1906	3	111044930
Aco2	0.039957	0.096499	1907	3	81909633
Eprs	0.039985	0.096557	1908	2	185374200
Grb14	0.040059	0.096704	1909	1	65022478
Psma2	0.040083	0.096749	1910	3	14616846
Inpp1	0.040092	0.096767	1911	3	52791738
Cst6	0.040109	0.096795	1912	1	5349095
Olfr181	0.040173	0.096918	1913	2	58926453
Olfr31	0.040217	0.097007	1914	2	14328168
Mup20	0.040257	0.097093	1915	3	62053975
Xk	0.040257	0.097093	1916	3	9309260
Zdhhc22	0.040264	0.097108	1917	3	86988453
Vhl	0.040267	0.097117	1918	3	113624334
Flywch1	0.040282	0.097151	1919	3	23762416
Inhba	0.040306	0.097188	1920	1	16026570
Rps17	0.04031	0.097194	1921	3	81344316
Col11a2	0.040326	0.097224	1922	3	34051309
F11r	0.040376	0.097332	1923	3	171460946
Phf13	0.040405	0.097403	1924	1	151994028
Sptlc3	0.040426	0.097437	1925	3	139547240
Rpl14	0.040455	0.097511	1926	1	120572861
Ttyh3	0.040489	0.097587	1927	2	140631540
Bbs4	0.040504	0.097617	1928	1	59327297
Tarm1	0.040545	0.097714	1929	2	3496938
Prm3	0.040603	0.09784	1930	2	10790787
Ano9	0.040635	0.097909	1931	3	141107401
Coro1c	0.040635	0.097909	1932	3	113847534
Snx9	0.040648	0.097935	1933	3	5899429
2310011J03Rik	0.040652	0.097943	1934	2	80319473
Cyp2c68	0.040664	0.097961	1935	3	39739144
Fbxw11	0.040664	0.097961	1936	3	32735284
Snx25	0.040701	0.098045	1937	3	46068166
Fut7	0.040702	0.098046	1938	2	25425234
Gm10228	0.04072	0.098074	1939	3	89041392
Kdm1a	0.040748	0.098137	1940	3	136573095
1700001P01Rik	0.040799	0.098233	1941	3	97775706
Gltscr1	0.040801	0.098241	1942	3	15988565
BC005537	0.040824	0.086561	1943	2	24804939
Csnk1g2	0.040833	0.0983	1944	3	80637912
Sec11c	0.0409	0.09844	1945	2	65812734
Fbxw19	0.040902	0.098446	1946	2	109486040
Nupl2	0.040949	0.098552	1947	2	24167357
Setmar	0.040984	0.098623	1948	3	108075771
Stt3b	0.040999	0.098654	1949	1	115276772
Cnnm3	0.041	0.098656	1950	3	36512613
Hira	0.041016	0.098692	1951	3	18897772
Mal	0.041048	0.098739	1952	1	127638699
Fam19a2	0.041069	0.098792	1953	2	123593596
1700017B05Rik	0.041069	0.098792	1954	3	57257388
Trim56	0.041123	0.098898	1955	3	137113532
Trib1	0.041161	0.098969	1956	3	59651536
Cfhr1	0.041196	0.099035	1957	1	139550998
Sprr3	0.041287	0.099243	1958	3	92457290
Slc2a13	0.041293	0.099252	1959	3	91572830
Olfr1211	0.041319	0.09931	1960	3	88929869
BC030307	0.041363	0.099405	1961	3	86719642
Fam13c	0.041388	0.099463	1962	3	70498945
Timd4	0.041394	0.099474	1963	2	46815681
Uvrag	0.041404	0.099495	1964	3	99099468
Ccdc171	0.041405	0.0995	1965	2	83557963
Ppap2a	0.041426	0.099541	1966	3	112834908
Nme5	0.041433	0.099554	1967	3	34571636
Esp6	0.041468	0.099629	1968	1	40565328
Myh13	0.041468	0.099629	1969	2	67347977
Hapln4	0.041506	0.099719	1970	2	70087087
Sec61a1	0.041542	0.099781	1971	1	88507350
Pcnxl3	0.041563	0.099824	1972	2	5681472
Clec4a3	0.041591	0.099891	1973	3	122966534
Ptp4a1	0.041641	0.1	1974	2	30944539
Tnp1	0.041649	0.10001	1975	3	73015831
Ldlrap1	0.041655	0.10003	1976	3	134758989
Med20	0.041664	0.10005	1977	2	47618975
Zfp738	0.04169	0.1001	1978	2	67673022
Slamf8	0.041706	0.10013	1979	3	172587953
Clspn	0.04174	0.10021	1980	2	126566316
Ccr9	0.041744	0.10022	1981	3	123779850
Olfr643	0.04177	0.10027	1982	3	104059380
Pecr	0.041782	0.1003	1983	2	72277415
Dnlz	0.041789	0.10032	1984	2	26351910
2300002M23Rik	0.041827	0.10038	1985	3	35568215
Megf9	0.041838	0.10041	1986	1	70534432
Cyp2b13	0.041869	0.10047	1987	3	26081659
Caprin2	0.041888	0.10053	1988	1	148877842
Zbtb10	0.041891	0.10054	1989	3	9251543
Hist1h3h	0.041937	0.10063	1990	1	21717684
Klra7	0.041946	0.10065	1991	2	130228664
Zbtb45	0.041955	0.10068	1992	3	13008067
Sgcg	0.042013	0.10079	1993	2	61245808
Afap1l1	0.042025	0.10081	1994	2	61746795
Tubb1	0.04207	0.1009	1995	3	174456610
Tmem33	0.042083	0.10092	1996	3	67267356
Arhgap12	0.042102	0.10096	1997	3	6112161
Zfp37	0.042121	0.101	1998	3	62192279
Usp50	0.042135	0.10104	1999	1	126779956
[truncated: 17,673 more rows]

## Sheet: sgRNA Summary
sgRNA	Gene id	control_count	treatment_count	control_med	treat_med	LFC	p-value		Legend:
45720	Pcdhga8	198.6/182.5/175.8	199.86/1984.3/2279.8	182.5	1984.3	3.4356	0		sgRNA = sgRNA number in Brie Library
58640	Tardbp	12.159/62.86/87.457	49.072/296.15/294.79	62.86	294.79	2.2116	7.1772e-49		Gene id = gene name in Mus musculus
25368	Supt20	142.44/124.71/192.58	204.32/755.4/460.14	142.44	460.14	1.6848	7.9898e-41		control_count = sgRNA count in mock-infected cells (rep1/rep2/rep3)
4559	Dyrk1a	127.96/125.72/119.26	164.17/643.8/414.5	125.72	414.5	1.7132	2.4134e-38		treatment_count = sgRNA count in sorted cells (rep1/rep2/rep3)
50428	Dscaml1	99.01/156.14/111.31	163.28/638.08/374.1	111.31	374.1	1.7398	5.4088e-36		control_med = median of control replicates
57623	Ambra1	72.955/39.541/73.322	91.007/486.43/279.83	72.955	279.83	1.925	3.8544e-34		treat_med = median of treatment replicates
25367	Supt20	106.54/105.44/135.16	144.54/337.64/389.07	106.54	337.64	1.6549	1.8308e-29		LFC = log2 fold change treatment/control
21217	Tada1	133.17/117.61/185.51	92.791/384.85/382.33	133.17	382.33	1.5145	1.5512e-27		p-value = p-value of sgRNA in positive selection
60388	Nfrkb	56.164/55.763/98.058	63.348/217.46/293.3	56.164	217.46	1.9342	2.2465e-27
47300	Taf5l	75.85/78.068/100.71	80.3/286.13/266.36	78.068	266.36	1.7576	7.0914e-27
33227	Pcyt2	20.844/43.596/32.686	35.689/167.39/145.9	32.686	145.9	2.1246	1.8114e-23
46129	Spock2	78.166/92.262/119.26	126.7/557.96/276.83	92.262	276.83	1.5749	3.2792e-22
25654	Nelfcd	20.265/34.471/61.838	18.737/683.86/146.65	34.471	146.65	2.0574	5.5939e-22
3974	Dad1	15.054/14.194/37.103	7.1378/90.132/89.036	15.054	89.036	2.4876	6.9052e-22
20001	Nelfa	28.371/67.929/61.838	42.827/412.03/210.24	61.838	210.24	1.7492	1.7197e-21
21085	Mrpl17	36.477/68.943/49.471	53.533/360.53/181.06	49.471	181.06	1.8509	3.7332e-21
24259	Uchl5	67.744/95.303/118.38	130.26/866.99/276.09	95.303	276.09	1.5247	9.197e-21
52757	Taf3	66.586/56.776/84.807	95.468/701.03/214.73	66.586	214.73	1.6745	4.9744e-20
14997	Rps16	2.316/2.0277/21.202	0/125.9/29.18	2.316	29.18	3.1861	6.297e-19
43738	C330007P06Rik	61.375/57.79/114.84	74.054/653.82/198.27	61.375	198.27	1.6757	1.0799e-18
56905	Taf5	60.796/88.206/66.255	65.132/216.03/208	66.255	208	1.6358	1.4118e-18
40926	Mau2	75.271/123.69/118.38	158.82/955.69/306.76	118.38	306.76	1.3663	2.1854e-18
56754	Taf6l	62.533/90.234/110.43	127.59/251.8/317.99	90.234	251.8	1.4703	8.3136e-18
25143	Gsk3b	143.59/91.248/98.941	320.31/267.54/190.79	98.941	267.54	1.426	1.0715e-17
38338	Xpo5	48.637/59.818/102.47	54.425/354.81/190.79	59.818	190.79	1.657	1.1438e-17
75683	Gm6484	86.851/77.054/116.61	90.114/359.1/244.66	86.851	244.66	1.4835	1.1471e-17
20104	Rfwd2	69.481/101.39/67.139	99.036/277.55/210.24	69.481	210.24	1.5836	1.4001e-17
51248	Sumo2	94.378/93.276/90.107	99.929/301.87/255.89	93.276	255.89	1.4462	1.7371e-17
35304	Tut1	4.053/11.153/22.085	1.7844/74.395/66.59	11.153	66.59	2.4756	4.9814e-17
32368	Eif3h	49.795/42.582/80.39	64.24/473.55/166.85	49.795	166.85	1.7244	4.9983e-17
4076	Dscr3	44.584/28.388/32.686	58.887/184.56/127.19	32.686	127.19	1.9281	6.3774e-17
19937	Taf10	107.12/190.61/201.42	94.575/582.28/418.24	190.61	418.24	1.1296	7.6018e-17
46162	Dgcr8	40.53/32.444/70.672	70.485/539.36/145.15	40.53	145.15	1.8152	9.5742e-17
29212	Ppcdc	49.795/64.887/100.71	71.378/220.32/195.28	64.887	195.28	1.5748	2.6546e-16
4830	Eif4g2	46.321/79.081/101.59	90.114/276.12/219.22	79.081	219.22	1.4594	1.5135e-15
2724	Cebpb	54.427/72.998/64.488	87.438/227.48/190.04	64.488	190.04	1.5446	2.4866e-15
15617	Spi1	15.633/31.43/70.672	24.09/702.46/118.22	31.43	118.22	1.8782	4.5979e-15
58642	Tardbp	3.474/22.305/26.502	1.7844/331.92/95.022	22.305	95.022	2.0427	6.4254e-15
26082	Nelfb	5.7901/22.305/26.502	8.03/251.8/95.022	22.305	95.022	2.0427	6.4254e-15
19838	Abce1	22.002/25.347/50.354	35.689/143.07/102.5	25.347	102.5	1.974	8.4674e-15
68235	Rpl12	16.791/15.208/34.453	15.168/100.15/79.309	16.791	79.309	2.1744	1.1225e-14
40976	Kcnk16	101.91/46.638/57.421	172.2/270.4/33.669	57.421	172.2	1.5679	1.6851e-14
38176	Supt7l	142.44/158.16/208.48	183.8/434.92/347.17	158.16	347.17	1.1293	2.6555e-14
41843	Ccdc101	174.28/147.01/169.61	223.95/555.1/364.37	169.61	364.37	1.0986	3.5235e-14
28004	Haus2	46.9/39.541/51.237	46.395/319.04/148.14	46.9	148.14	1.6386	6.733e-14
63745	Rgs13	63.112/44.61/55.654	49.072/270.4/165.35	55.654	165.35	1.554	9.0717e-14
23340	Rragc	45.163/65.901/61.838	20.521/1041.5/177.32	61.838	177.32	1.5048	9.7272e-14
5184	Drosha	55.006/94.289/115.73	55.318/759.69/236.43	94.289	236.43	1.3171	1.1619e-13
12959	Pigf	76.429/99.359/78.623	57.994/470.69/207.25	78.623	207.25	1.3871	1.8967e-13
8223	Id2	80.482/83.137/127.21	60.671/299.01/213.99	83.137	213.99	1.3534	3.368e-13
17233	Tcf7	63.691/55.763/83.04	115.1/230.34/178.07	63.691	178.07	1.4689	3.6024e-13
42644	Det1	56.743/86.179/58.305	112.42/505.03/167.6	58.305	167.6	1.5074	3.8622e-13
29360	Cpne8	35.319/52.721/72.439	50.857/190.28/156.37	52.721	156.37	1.5506	4.434e-13
2654	Cdkn1a	275.61/249.41/322.44	333.69/510.75/560.4	275.61	510.75	0.8876	6.6462e-13
25656	Nelfcd	85.693/105.44/119.26	115.99/371.98/250.65	105.44	250.65	1.2413	7.2257e-13
73986	Pnpla1	44.005/58.804/39.753	49.072/359.1/137.67	44.005	137.67	1.6235	7.8025e-13
19998	Nelfa	42.847/26.36/70.672	34.797/191.71/133.93	42.847	133.93	1.6217	1.6267e-12
33176	Tm2d3	83.377/76.04/109.54	48.18/261.81/209.5	83.377	209.5	1.3189	2.3388e-12
51773	Stab1	61.954/52.721/88.34	96.36/344.79/170.59	61.954	170.59	1.4466	2.4238e-12
31403	Dph2	64.27/101.39/68.905	95.468/323.33/182.56	68.905	182.56	1.3928	3.5685e-12
30323	2810474O19Rik	84.535/69.957/113.96	106.17/618.05/209.5	84.535	209.5	1.2992	5.0718e-12
37608	Rpap3	49.216/44.61/76.856	27.659/344.79/142.91	49.216	142.91	1.5189	1.1452e-11
36588	Nipbl	18.528/37.513/17.668	53.533/75.826/95.022	18.528	75.826	1.976	1.3508e-11
38103	Cenpn	3.474/33.458/17.668	7.1378/206.02/73.324	17.668	73.324	1.9933	1.7198e-11
24344	Actr8	33.582/31.43/36.22	27.659/254.66/109.99	33.582	109.99	1.6823	2.0497e-11
5865	Brd2	68.323/72.998/113.08	64.24/187.42/185.55	72.998	185.55	1.334	2.1193e-11
24528	Eif3c	52.69/49.679/47.704	57.102/150.22/142.16	49.679	142.16	1.4981	2.5356e-11
48007	Brd9	57.901/74.012/91.874	83.869/204.59/185.55	74.012	185.55	1.3144	4.2591e-11
55192	Srp68	18.528/16.222/39.753	11.599/248.94/74.072	18.528	74.072	1.9427	5.307e-11
46743	Taf13	38.793/107.47/70.672	50.857/178.83/183.31	70.672	178.83	1.3272	5.9161e-11
71834	Zranb1	74.692/127.75/112.19	142.76/324.76/248.4	112.19	248.4	1.1397	6.0441e-11
55131	Cdc27	26.634/19.263/59.188	41.042/659.54/92.777	26.634	92.777	1.7628	7.0076e-11
1296	Atp6v0e	44.584/62.86/63.605	26.767/557.96/163.86	62.86	163.86	1.3682	8.9956e-11
27033	Mrps23	90.325/110.51/135.16	106.17/409.17/243.91	110.51	243.91	1.1351	1.0541e-10
58626	Vps13d	42.847/43.596/79.506	30.336/492.15/127.19	43.596	127.19	1.5233	1.1583e-10
58744	Haus3	23.739/24.333/49.471	38.365/121.61/86.791	24.333	86.791	1.7931	1.1629e-10
47618	Maml1	57.901/53.735/85.69	46.395/155.94/154.13	57.901	154.13	1.3971	1.2149e-10
54870	Usp22	111.75/107.47/128.98	177.55/277.55/245.41	111.75	245.41	1.128	1.2237e-10
55123	Atxn7l3	75.85/84.151/112.19	72.27/363.39/199.77	84.151	199.77	1.2375	1.3943e-10
16235	Snap91	82.219/76.04/75.089	74.054/313.32/185.55	76.04	185.55	1.2759	1.6121e-10
35393	Cyp4f16	0.57901/4.0555/0.8834	0/367.68/12.719	0.8834	12.719	2.8648	2.1205e-10
32380	Ino80	41.109/46.638/73.322	42.827/168.82/131.68	46.638	131.68	1.4778	2.2633e-10
68850	Eif5a	19.686/27.374/26.502	47.288/422.05/89.784	26.502	89.784	1.7229	3.7901e-10
62435	Bnc2	111.17/74.012/92.757	124.02/331.92/210.99	92.757	210.99	1.177	3.967e-10
8087	Hspa9	1.158/16.222/11.484	1.7844/111.59/53.122	11.484	53.122	2.1161	4.0202e-10
57869	Taf4a	53.269/68.943/73.322	88.33/493.58/169.84	68.943	169.84	1.2884	5.867e-10
24434	Fam60a	53.848/58.804/87.457	56.21/413.46/151.89	58.804	151.89	1.3541	6.1218e-10
61612	Gmnc	48.637/48.666/75.089	45.503/434.92/133.18	48.666	133.18	1.4339	6.5852e-10
1023	Arf1	64.849/85.165/93.641	59.779/652.39/196.78	85.165	196.78	1.1987	7.0185e-10
8428	Igll1	110.59/116.59/106.89	129.37/449.23/237.18	110.59	237.18	1.0938	8.3704e-10
69837	Fbxw16	136.07/94.289/90.99	140.97/387.71/210.99	94.289	210.99	1.1536	8.8782e-10
34046	Snx5	36.477/54.749/71.556	55.318/158.8/142.91	54.749	142.91	1.3681	1.2234e-09
18625	Vmn2r42	6.9481/7.0971/17.668	6.2455/44.351/38.907	7.0971	38.907	2.3012	1.2431e-09
66007	Olfr734	89.746/55.763/50.354	144.54/197.43/80.058	55.763	144.54	1.3584	1.3243e-09
71648	Morc3	22.581/86.179/107.78	21.413/201.72/196.03	86.179	196.03	1.1764	1.5681e-09
46302	C77080	56.743/74.012/70.672	64.24/361.96/169.09	70.672	169.09	1.2468	2.2951e-09
60830	Tceal1	82.798/74.012/145.76	117.77/297.58/189.3	82.798	189.3	1.1833	2.3209e-09
25577	Brd4	32.424/63.873/75.973	51.749/181.7/157.12	63.873	157.12	1.2853	2.5879e-09
31309	Hypk	20.265/35.485/23.852	12.491/220.32/80.806	23.852	80.806	1.7188	2.6536e-09
36114	Kdsr	12.159/22.305/21.202	8.03/118.75/74.82	21.202	74.82	1.7719	2.8018e-09
55778	Ska3	30.687/40.555/42.403	17.844/363.39/114.47	40.555	114.47	1.4745	3.1003e-09
51266	Krtap19-9b	39.951/43.596/60.071	45.503/120.18/121.96	43.596	120.18	1.4421	3.1876e-09
23350	Pbsn	114.64/70.971/70.672	168.63/337.64/50.13	70.971	168.63	1.2369	3.2424e-09
27879	Dimt1	72.955/81.109/79.506	66.024/183.13/182.56	79.506	182.56	1.1891	3.5969e-09
28444	Gtf2h5	99.01/149.04/122.79	140.97/695.31/250.65	122.79	250.65	1.0235	3.8134e-09
25576	Brd4	85.114/74.012/68.905	106.17/173.11/198.27	74.012	173.11	1.2148	4.0334e-09
19839	Abce1	67.165/111.53/85.69	45.503/247.51/192.29	85.69	192.29	1.1568	4.0768e-09
19932	Taf7	103.06/138.9/127.21	104.39/440.65/256.63	127.21	256.63	1.0068	4.5971e-09
68541	Ogfod1	55.006/55.763/82.156	81.192/144.5/141.41	55.763	141.41	1.327	4.6729e-09
32566	Krt42	67.744/67.929/109.54	70.485/283.27/162.36	67.929	162.36	1.2449	4.8423e-09
3633	Csnk2b	40.53/43.596/55.654	60.671/532.21/118.96	43.596	118.96	1.4276	5.4958e-09
48985	U2af1	16.791/30.416/50.354	21.413/92.994/98.014	30.416	92.994	1.5811	6.7251e-09
12031	Nup62	13.896/12.166/7.9506	6.2455/90.132/51.626	12.166	51.626	1.9989	7.7151e-09
34195	Sec62	46.9/46.638/53.888	29.443/499.3/124.2	46.9	124.2	1.3862	7.9687e-09
43654	Bcl9	54.427/68.943/39.753	47.288/154.51/137.67	54.427	137.67	1.323	8.0683e-09
46349	Qars	23.739/21.291/51.237	24.982/78.687/86.043	23.739	78.687	1.6875	8.2657e-09
20023	Zfp68	81.64/71.984/113.08	85.653/439.22/183.31	81.64	183.31	1.1572	8.8321e-09
26738	Taf8	30.108/42.582/49.471	41.934/387.71/115.97	42.582	115.97	1.4243	8.9864e-09
5176	Khdrbs3	60.217/56.776/64.488	78.515/486.43/147.4	60.217	147.4	1.2775	9.2994e-09
32366	Eif3h	26.634/45.624/58.305	48.18/123.04/121.21	45.624	121.21	1.3902	1.0575e-08
62856	Zfp128	79.903/78.068/82.156	84.761/320.47/179.57	79.903	179.57	1.1583	1.1881e-08
16693	Srprb	26.055/34.471/28.269	30.336/158.8/87.54	28.269	87.54	1.597	1.1995e-08
23338	Rragc	26.055/46.638/53.888	25.874/301.87/122.71	46.638	122.71	1.3767	1.2272e-08
12947	Phtf1	121.59/98.345/136.04	173.09/543.66/243.91	121.59	243.91	0.99842	1.3977e-08
75528	Rhox3f	43.426/34.471/29.152	34.797/268.97/99.511	34.471	99.511	1.5026	1.4635e-08
46844	Gpn2	5.7901/9.1248/43.287	0/81.548/42.648	9.1248	42.648	2.108	1.4763e-08
46740	Taf13	38.793/50.693/93.641	57.102/151.65/129.44	50.693	129.44	1.3353	1.5374e-08
18138	Tsc2	46.9/39.541/43.287	53.533/406.31/115.97	43.287	115.97	1.4012	1.5933e-08
77910	Gm4301	23.16/25.347/20.318	61.563/88.702/76.317	23.16	76.317	1.6781	1.6149e-08
32906	Phf5a	7.5271/23.319/14.134	0/80.118/55.367	14.134	55.367	1.897	2.0623e-08
54868	Usp22	137.8/137.89/112.19	179.34/606.61/266.36	137.8	266.36	0.94574	2.0939e-08
36557	Oxsm	103.06/107.47/163.43	140.08/240.35/219.97	107.47	219.97	1.0266	2.7685e-08
73038	Ankrd63	140.12/114.57/94.524	166.85/268.97/230.45	114.57	230.45	1.002	2.9772e-08
19382	Adam23	89.167/48.666/45.054	124.02/248.94/61.353	48.666	124.02	1.3318	3.1898e-08
28143	Ostc	85.114/86.179/114.84	114.2/217.46/186.3	86.179	186.3	1.1033	3.3369e-08
62678	Sbno1	53.269/61.846/83.04	69.593/281.84/146.65	61.846	146.65	1.2323	3.3573e-08
31167	Bend5	92.641/77.054/63.605	198.97/171.68/86.043	77.054	171.68	1.1456	3.388e-08
40112	Usp16	67.165/70.971/80.39	77.623/543.66/161.61	70.971	161.61	1.176	3.5886e-08
56752	Taf6l	81.64/89.22/94.524	137.4/263.24/190.79	89.22	190.79	1.088	3.6499e-08
54869	Usp22	119.85/137.89/147.53	155.25/887.02/264.12	137.89	264.12	0.93272	3.6848e-08
48321	Ppcs	15.633/50.693/45.937	24.09/118.75/121.96	45.937	118.75	1.3512	3.7625e-08
28849	Pspc1	105.96/87.192/64.488	187.37/529.35/51.626	87.192	187.37	1.0948	3.9163e-08
56246	Zdhhc14	74.113/60.832/57.421	76.731/422.05/144.4	60.832	144.4	1.2336	4.0599e-08
69758	Taf2	40.53/52.721/43.287	64.24/313.32/113.73	43.287	113.73	1.3733	4.1597e-08
37821	1600002H07Rik	60.217/60.832/125.44	33.904/221.75/143.65	60.832	143.65	1.2262	5.2915e-08
45594	Clec2i	45.742/50.693/36.22	69.593/260.38/117.47	45.742	117.47	1.3417	5.4969e-08
49830	Dync2h1	78.745/69.957/79.506	89.222/371.98/172.83	78.745	172.83	1.1243	5.5288e-08
55644	Dhx29	39.951/54.749/75.089	44.611/190.28/133.18	54.749	133.18	1.2672	5.5772e-08
32282	Arpc4	23.739/64.887/61.838	41.042/208.88/145.15	61.838	145.15	1.2177	5.6588e-08
41201	Atp13a2	56.164/61.846/84.807	63.348/436.36/145.15	61.846	145.15	1.2176	5.6839e-08
75624	Prr19	187.6/108.48/109.54	220.38/384.85/113.73	109.54	220.38	1.0019	5.7315e-08
16887	Stxbp3a	70.06/59.818/85.69	64.24/346.22/158.62	70.06	158.62	1.1675	5.8849e-08
25094	Pfdn5	8.6851/9.1248/14.134	3.5689/336.21/41.151	9.1248	41.151	2.0577	5.9284e-08
5516	Fgf10	103.06/119.64/90.99	75.839/814.05/210.24	103.06	210.24	1.0215	6.261e-08
57870	Taf4a	57.901/79.081/97.174	134.73/366.25/172.83	79.081	172.83	1.1182	6.5238e-08
47072	Tada3	71.218/79.081/118.38	57.102/254.66/172.83	79.081	172.83	1.1182	6.5238e-08
50444	Vsx1	51.532/46.638/69.789	91.007/502.17/127.19	51.532	127.19	1.2871	6.5699e-08
47269	Gadd45gip1	45.742/36.499/47.704	49.072/130.19/116.72	45.742	116.72	1.3326	7.4378e-08
32502	Diras2	70.06/99.359/74.206	55.318/256.09/164.6	74.206	164.6	1.1388	7.4475e-08
15057	Rptn	87.43/32.444/37.103	97.252/250.37/101.01	37.103	101.01	1.4207	7.5132e-08
3410	Crebbp	149.96/176.41/142.23	158.82/649.53/278.33	149.96	278.33	0.88778	7.6842e-08
13659	Prkar2a	27.792/42.582/26.502	27.659/125.9/83.05	27.792	83.05	1.5456	7.7329e-08
38080	Wdfy3	139.54/147.01/189.93	161.49/360.53/273.84	147.01	273.84	0.8929	8.1573e-08
2757	Cetn3	111.75/109.5/124.56	99.036/536.5/222.22	111.75	222.22	0.98533	8.3942e-08
14346	Rad1	21.423/40.555/28.269	5.3533/492.15/83.799	28.269	83.799	1.5347	8.5615e-08
70895	Bpi	99.01/141.94/128.09	246.25/536.5/136.92	128.09	246.25	0.93757	8.6209e-08
32365	Upf3b	75.85/76.04/111.31	49.964/450.66/166.85	76.04	166.85	1.1235	9.2567e-08
104	Acox1	1.158/0/7.9506	12.491/181.7/4.4892	1.158	12.491	2.6442	9.539e-08
30302	Cinp	16.212/29.402/27.385	16.952/88.702/81.554	27.385	81.554	1.5402	1.1007e-07
75762	Vmn2r35	19.107/18.25/30.036	14.276/88.702/64.345	19.107	64.345	1.7004	1.1176e-07
46652	Dnajc24	95.536/115.58/137.81	91.899/1230.4/226.71	115.58	226.71	0.96584	1.1401e-07
46741	Taf13	28.95/75.026/73.322	53.533/426.34/161.61	73.322	161.61	1.1296	1.2211e-07
367	Adora3	77.587/71.984/106.89	76.731/313.32/168.35	77.587	168.35	1.1076	1.2443e-07
41716	Pfn3	68.323/62.86/98.941	66.917/539.36/153.38	68.323	153.38	1.1551	1.2891e-07
70490	Upf2	55.585/51.707/41.52	51.749/311.89/125.7	51.707	125.7	1.2653	1.2919e-07
16797	Stfa2	110.01/121.66/117.49	134.73/761.12/228.95	117.49	228.95	0.95652	1.3164e-07
22847	Nxf1	8.1061/25.347/11.484	3.5689/234.63/46.389	11.484	46.389	1.9244	1.3165e-07
47140	Klk9	77.587/89.22/135.16	88.33/775.42/186.3	89.22	186.3	1.0538	1.3327e-07
43180	Ago4	60.796/55.763/74.206	57.102/513.61/140.66	60.796	140.66	1.1969	1.463e-07
64346	Olfr1474	93.799/70.971/66.255	98.144/489.29/157.12	70.971	157.12	1.1356	1.5286e-07
30394	Pagr1a	49.795/75.026/45.937	57.994/141.64/121.96	49.795	121.96	1.2754	1.5295e-07
6492	Ostm1	90.904/64.887/53.004	147.22/603.74/70.331	64.887	147.22	1.1696	1.5529e-07
68138	Sap130	30.108/27.374/45.937	34.797/100.15/86.043	30.108	86.043	1.4844	1.6715e-07
30916	Ccar1	49.216/68.943/53.888	54.425/200.29/128.69	53.888	128.69	1.2405	1.6837e-07
44083	Nav2	77.008/100.37/81.273	68.701/173.11/187.05	81.273	173.11	1.0815	1.6966e-07
7353	Hars	29.529/56.776/59.188	24.09/290.43/133.18	56.776	133.18	1.2156	1.9224e-07
25050	Pex3	123.33/103.41/98.941	147.22/336.21/206.5	103.41	206.5	0.99082	1.9347e-07
69304	Hist1h2bm	74.113/107.47/93.641	46.395/193.14/191.54	93.641	191.54	1.0246	2.0418e-07
48518	Kazald1	47.479/91.248/51.237	52.641/769.7/123.45	51.237	123.45	1.2525	2.1982e-07
71346	Thoc2	93.799/101.39/113.96	107.07/317.61/202.76	101.39	202.76	0.99287	2.3205e-07
58643	Tardbp	8.6851/34.471/37.986	21.413/161.67/93.525	34.471	93.525	1.414	2.3853e-07
68260	Slc28a2	84.535/87.192/90.99	69.593/223.19/181.06	87.192	181.06	1.0457	2.4132e-07
73353	Tas2r138	90.325/78.068/54.771	166.85/208.88/83.799	78.068	166.85	1.086	2.4472e-07
34584	Wdr5b	74.113/39.541/63.605	79.408/206.02/143.65	63.605	143.65	1.1629	2.5152e-07
9095	Kcnj9	54.427/39.541/25.619	102.61/125.9/35.914	39.541	102.61	1.3537	2.571e-07
42523	Dnttip1	31.845/45.624/43.287	57.102/311.89/109.24	43.287	109.24	1.3157	2.6045e-07
55657	Paip1	101.33/64.887/47.704	145.43/153.08/69.583	64.887	145.43	1.1522	2.7786e-07
17459	Tex264	83.956/92.262/94.524	188.26/396.3/85.295	92.262	188.26	1.021	2.8137e-07
24167	Grasp	61.375/69.957/84.807	103.5/206.02/153.38	69.957	153.38	1.1215	2.963e-07
8446	Ikbkg	57.901/77.054/78.623	38.365/257.52/164.6	77.054	164.6	1.0852	2.966e-07
32381	Ino80	63.691/92.262/90.99	98.144/185.99/261.87	90.99	185.99	1.0234	3.083e-07
33239	Smtnl1	123.33/72.998/92.757	139.19/344.79/188.55	92.757	188.55	1.0156	3.1886e-07
67970	Sptlc1	28.371/49.679/60.955	25.874/121.61/119.71	49.679	119.71	1.2521	3.2715e-07
67801	Cyb5r4	85.114/104.43/91.874	149.89/307.59/187.05	91.874	187.05	1.0178	3.3254e-07
72465	Mup21	84.535/104.43/77.739	66.024/439.22/175.83	84.535	175.83	1.0478	3.3289e-07
8719	Ipp	138.96/150.05/189.93	104.39/277.55/270.85	150.05	270.85	0.84776	3.9649e-07
18372	Uba1y	88.588/74.012/72.439	158.82/487.86/80.806	74.012	158.82	1.0912	4.0056e-07
54594	Med16	61.375/51.707/106.01	105.28/174.54/138.42	61.375	138.42	1.1604	4.2513e-07
26740	Taf8	36.477/67.929/40.637	41.042/150.22/103.25	40.637	103.25	1.3242	4.3825e-07
55122	Atxn7l3	99.589/113.55/93.641	143.65/334.78/197.53	99.589	197.53	0.98085	4.4782e-07
29245	Rnf186	121.01/148.02/118.38	165.06/327.62/228.95	121.01	228.95	0.91429	4.4989e-07
25655	Nelfcd	22.002/39.541/34.453	48.18/766.84/92.029	34.453	92.029	1.3918	4.5392e-07
44878	Lrba	147.07/138.9/126.33	86.545/304.73/254.39	138.9	254.39	0.8683	4.648e-07
1074	Arhgdib	148.23/106.46/98.941	210.56/207.45/178.82	106.46	207.45	0.95594	4.7807e-07
28566	Rwdd1	78.745/70.971/62.722	72.27/163.1/153.38	70.971	153.38	1.101	4.8515e-07
55843	Tdrd3	87.43/64.887/64.488	84.761/557.96/143.65	64.887	143.65	1.1345	4.9016e-07
63662	Myo1g	95.536/113.55/132.51	72.27/329.05/217.73	113.55	217.73	0.93312	4.9315e-07
6635	Gnb2l1	18.528/13.18/31.802	18.737/61.519/60.604	18.528	60.604	1.6575	5.0214e-07
2722	Cebpb	45.742/55.763/80.39	68.701/598.02/128.69	55.763	128.69	1.1921	5.0566e-07
16905	Supt4a	130.86/154.11/108.66	119.56/426.34/242.42	130.86	242.42	0.88447	5.2337e-07
20103	Rfwd2	56.743/66.915/54.771	103.5/130.19/133.93	56.743	130.19	1.184	5.2615e-07
36002	Med26	38.793/33.458/65.372	59.779/194.57/99.511	38.793	99.511	1.3367	5.2943e-07
49786	Triobp	94.378/87.192/90.107	107.96/304.73/182.56	90.107	182.56	1.0106	5.4072e-07
10277	Magoh	63.691/56.776/92.757	55.318/347.65/141.41	63.691	141.41	1.1384	5.4246e-07
49841	Sec13	10.422/18.25/33.569	6.2455/71.534/59.856	18.25	59.856	1.6606	5.5e-07
25305	C1qtnf1	66.586/67.929/107.78	100.82/314.75/148.14	67.929	148.14	1.1135	5.5062e-07
40124	Actr3	53.848/57.79/78.623	49.964/353.38/131.68	57.79	131.68	1.1743	5.6814e-07
35008	Med30	9.8431/16.222/24.735	11.599/82.979/55.367	16.222	55.367	1.7106	5.8245e-07
16585	Spp1	93.799/103.41/90.107	95.468/238.92/187.8	93.799	187.8	0.9939	5.8941e-07
73494	Mettl21e	96.115/96.317/127.21	71.378/193.14/191.54	96.317	191.54	0.98439	5.9404e-07
59498	Bloc1s3	100.17/101.39/108.66	104.39/583.71/199.02	101.39	199.02	0.96613	6.0321e-07
61054	Tusc5	93.22/65.901/62.722	144.54/293.29/71.827	65.901	144.54	1.1213	6.1795e-07
16946	Svs4	58.48/58.804/88.34	41.934/133.05/176.58	58.804	133.05	1.1645	6.2515e-07
1815	C2	82.219/97.331/59.188	109.74/517.9/169.84	82.219	169.84	1.0377	6.5574e-07
64264	Olfr787	112.91/70.971/90.107	90.114/333.35/181.81	90.107	181.81	1.0047	6.599e-07
26085	Nelfb	21.423/39.541/67.139	36.581/158.8/100.26	39.541	100.26	1.3206	6.6866e-07
36876	Cyp2u1	77.008/64.887/110.43	69.593/207.45/161.61	77.008	161.61	1.0597	6.9382e-07
28941	Trappc5	67.165/68.943/105.12	49.964/457.82/148.89	68.943	148.89	1.0997	7.1546e-07
59296	Clec2e	69.481/111.53/74.206	87.438/203.16/157.12	74.206	157.12	1.0721	7.2138e-07
54989	Nle1	20.265/19.263/24.735	30.336/127.33/63.597	20.265	63.597	1.603	7.2982e-07
3824	Cyp1b1	152.86/112.54/108.66	226.62/214.6/115.97	112.54	214.6	0.92518	7.2984e-07
24963	Srpk3	111.75/128.76/161.66	109.74/238.92/237.93	128.76	237.93	0.88072	7.303e-07
13960	Pten	231.6/178.44/187.28	242.68/659.54/318.73	187.28	318.73	0.76398	7.5833e-07
78124	Esp24	96.694/80.095/90.99	67.809/668.12/182.56	90.99	182.56	0.99671	7.6945e-07
68768	Srsf12	68.902/84.151/85.69	35.689/187.42/172.09	84.151	172.09	1.0234	7.964e-07
51597	Vmn1r212	163.86/95.303/83.04	221.27/188.85/83.05	95.303	188.85	0.97919	8.0377e-07
16792	Stfa1	151.7/95.303/121.91	103.5/373.41/227.45	121.91	227.45	0.8943	8.5179e-07
22409	Mfhas1	103.64/108.48/128.09	116.88/393.44/208	108.48	208	0.93279	8.612e-07
59547	Hnrnpul1	158.07/107.47/113.96	215.92/373.41/104	113.96	215.92	0.91603	8.6901e-07
60804	Arhgef9	125.64/167.29/114.84	141.86/848.39/232.69	125.64	232.69	0.88382	8.7135e-07
48261	Qtrtd1	92.062/66.915/68.905	125.8/165.96/148.14	68.905	148.14	1.0932	8.8047e-07
2182	Cbfb	75.271/85.165/116.61	173.09/217.46/125.7	85.165	173.09	1.0147	9.2088e-07
52027	Olfr707	86.851/54.749/83.04	89.222/483.57/169.84	83.04	169.84	1.0235	9.26e-07
51850	Nrbp1	24.318/57.79/60.071	25.874/291.86/130.19	57.79	130.19	1.158	9.3084e-07
2380	Cd22	75.271/72.998/89.224	95.468/197.43/157.87	75.271	157.87	1.0586	9.3725e-07
29251	Ttc1	26.055/37.513/41.52	33.012/243.21/95.77	37.513	95.77	1.3292	9.5936e-07
18362	Uba3	10.422/9.1248/34.453	15.168/55.796/41.151	10.422	41.151	1.8837	9.9485e-07
5131	Erh	13.317/40.555/48.587	29.443/290.43/101.01	40.555	101.01	1.2956	1.0048e-06
3652	Smc3	46.9/54.749/98.941	35.689/490.72/124.95	54.749	124.95	1.1758	1.0173e-06
13186	Serpinb2	63.112/53.735/53.888	42.827/228.91/123.45	53.888	123.45	1.1811	1.0455e-06
11036	Mtf2	86.851/95.303/109.54	99.036/317.61/187.8	95.303	187.8	0.97119	1.0501e-06
75345	Ndufs5	34.74/42.582/42.403	33.904/240.35/104	42.403	104	1.2745	1.0916e-06
75351	Gsk3a	95.536/82.123/92.757	183.8/356.24/131.68	92.757	183.8	0.97894	1.1086e-06
25457	Olfr480	61.375/58.804/69.789	41.042/163.1/135.42	61.375	135.42	1.1291	1.1105e-06
74459	Krtap1-3	177.18/143.97/140.46	218.59/299.01/257.38	143.97	257.38	0.83376	1.1105e-06
45046	Vmn1r148	19.107/41.568/45.937	34.797/389.14/102.5	41.568	102.5	1.2818	1.1137e-06
1735	Bsg	97.273/79.081/78.623	124.02/502.17/163.11	79.081	163.11	1.0351	1.1194e-06
57868	Taf4a	108.85/97.331/110.43	125.8/231.77/207.25	108.85	207.25	0.92275	1.1691e-06
59806	Cnga4	151.7/95.303/69.789	187.37/258.95/73.324	95.303	187.37	0.96788	1.1714e-06
23023	Clasrp	22.581/39.541/80.39	34.797/104.44/98.763	39.541	98.763	1.2991	1.2087e-06
17396	Tek	85.693/69.957/93.641	59.779/403.45/172.83	85.693	172.83	1.0037	1.2211e-06
30805	Ergic1	107.12/89.22/86.573	65.132/211.74/178.07	89.22	178.07	0.98902	1.2419e-06
58535	Sesn2	156.91/105.44/135.16	244.47/816.91/104	135.16	244.47	0.85023	1.2558e-06
23138	Svs2	71.218/99.359/63.605	96.36/300.44/150.39	71.218	150.39	1.0678	1.3211e-06
8091	Hspe1	5.2111/17.236/60.071	6.2455/64.38/56.115	17.236	56.115	1.6471	1.402e-06
73888	Gm11541	114.06/110.51/134.28	109.74/474.98/213.99	114.06	213.99	0.9018	1.4065e-06
55052	Kat7	46.321/45.624/65.372	56.21/309.03/109.99	46.321	109.99	1.2298	1.4121e-06
71651	Morc3	38.793/85.165/114.84	61.563/184.56/171.34	85.165	171.34	1.0001	1.4699e-06
77761	Vmn2r41	13.317/21.291/26.502	18.737/117.32/64.345	21.291	64.345	1.5516	1.5112e-06
38271	Oraov1	15.054/24.333/45.054	17.844/72.964/70.331	24.333	70.331	1.4935	1.5271e-06
29729	Mettl6	104.8/97.331/94.524	112.42/464.97/189.3	97.331	189.3	0.95252	1.529e-06
6203	Gbas	108.27/126.73/129.86	131.16/477.84/231.19	126.73	231.19	0.8622	1.6951e-06
45914	Pcdhb12	134.33/80.095/94.524	184.69/394.87/106.99	94.524	184.69	0.95896	1.7164e-06
25144	Gsk3b	107.7/81.109/66.255	107.96/490.72/164.6	81.109	164.6	1.0121	1.7291e-06
61696	Mmp25	73.534/84.151/98.941	88.33/454.95/169.09	84.151	169.09	0.99824	1.777e-06
59804	Cnga4	153.44/95.303/98.941	190.94/296.15/181.06	98.941	190.94	0.94147	1.8259e-06
46873	Fam46b	75.85/83.137/82.156	165.95/247.51/87.54	82.156	165.95	1.0055	1.8416e-06
15905	Slc10a1	102.48/119.64/77.739	82.084/620.91/196.03	102.48	196.03	0.929	1.8621e-06
2014	Capns1	80.482/98.345/75.089	73.162/270.4/163.11	80.482	163.11	1.0101	2.0029e-06
12894	Pgam1	43.426/41.568/49.471	37.473/130.19/104	43.426	104	1.2409	2.0926e-06
20102	Rfwd2	81.64/148.02/70.672	95.468/685.29/164.6	81.64	164.6	1.0028	2.143e-06
56139	Eif2b5	68.902/97.331/77.739	88.33/248.94/158.62	77.739	158.62	1.0195	2.1895e-06
30126	Eef1g	6.9481/21.291/26.502	2.6767/75.826/63.597	21.291	63.597	1.535	2.2368e-06
19350	Zp1	53.848/45.624/48.587	112.42/230.34/46.389	48.587	112.42	1.1936	2.273e-06
6399	Ghr	143.01/59.818/75.089	154.35/161.67/86.791	75.089	154.35	1.0298	2.3294e-06
56258	Acat3	133.75/89.22/96.291	188.26/185.99/117.47	96.291	185.99	0.94257	2.3659e-06
13687	Mapk8ip1	94.957/82.123/94.524	79.408/190.28/183.31	94.524	183.31	0.94819	2.4155e-06
62123	Galnt5	162.7/168.3/161.66	185.58/356.24/279.08	162.7	279.08	0.77477	2.4637e-06
33169	Cryl1	74.113/66.915/121.91	83.869/433.49/152.63	74.113	152.63	1.0324	2.4813e-06
14886	Rpl21	10.422/23.319/37.103	2.6767/105.87/67.338	23.319	67.338	1.4906	2.5319e-06
31734	Lrrc28	78.166/81.109/106.01	75.839/214.6/163.11	81.109	163.11	0.99903	2.5778e-06
1486	Bcl2a1c	153.44/87.192/104.24	197.18/736.8/161.61	104.24	197.18	0.91311	2.59e-06
30397	Pagr1a	60.796/50.693/87.457	53.533/138.78/131.68	60.796	131.68	1.1024	2.6613e-06
23289	Atxn10	53.848/60.832/75.089	66.917/447.8/131.68	60.832	131.68	1.1016	2.7082e-06
58221	Ddx58	58.48/53.735/69.789	86.545/336.21/127.94	58.48	127.94	1.1163	2.7129e-06
19781	Med24	53.848/49.679/78.623	57.102/407.74/120.46	53.848	120.46	1.147	2.7504e-06
58770	Tada2b	110.59/108.48/121.91	117.77/206.02/213.24	110.59	206.02	0.89154	2.7725e-06
53295	Wwc1	64.27/61.846/98.941	71.378/221.75/136.92	64.27	136.92	1.0794	2.8523e-06
44003	Trappc6b	101.91/72.998/53.888	86.545/366.25/150.39	72.998	150.39	1.0327	2.8819e-06
59738	Synm	75.85/46.638/37.103	83.869/115.88/108.49	46.638	108.49	1.2006	2.8898e-06
60207	Edc4	151.12/135.86/136.04	146.32/670.99/241.67	136.04	241.67	0.82435	2.8965e-06
33498	Mrpl52	68.323/122.68/90.99	57.102/605.17/177.32	90.99	177.32	0.95494	2.9321e-06
42884	Ift46	88.009/82.123/103.36	52.641/512.18/172.83	88.009	172.83	0.96569	2.9931e-06
14611	Rela	23.16/43.596/54.771	48.18/168.82/103.25	43.596	103.25	1.2251	3.0445e-06
14903	Rpl27	5.7901/18.25/23.852	17.844/62.95/56.863	18.25	56.863	1.5878	3.0647e-06
42247	Hormad2	101.91/127.75/183.75	127.59/357.67/229.7	127.75	229.7	0.84147	3.1513e-06
5181	Drosha	78.745/128.76/74.206	126.7/178.83/158.62	78.745	158.62	1.0012	3.2971e-06
37395	1700003E16Rik	107.12/74.012/83.04	165.06/180.26/116.72	83.04	165.06	0.98257	3.2989e-06
57592	Tnks1bp1	77.008/69.957/73.322	79.408/303.3/150.39	73.322	150.39	1.0264	3.3048e-06
51533	Vmn1r202	164.44/98.345/121.91	221.27/243.21/126.45	121.91	221.27	0.85472	3.3125e-06
17197	Skp1a	20.265/45.624/22.085	16.06/98.716/64.345	22.085	64.345	1.5011	3.3954e-06
21288	Ing4	99.589/71.984/69.789	148.11/356.24/64.345	71.984	148.11	1.0307	3.5281e-06
9635	Lama3	108.27/55.763/71.556	91.007/449.23/147.4	71.556	147.4	1.0323	3.5844e-06
32303	Dynll2	59.059/47.652/67.139	83.869/503.6/127.94	59.059	127.94	1.1023	3.6024e-06
49871	Acat2	71.218/105.44/71.556	75.839/147.36/169.09	71.556	147.36	1.0319	3.6209e-06
4694	Eef2	17.37/28.388/22.968	6.2455/165.96/65.842	22.968	65.842	1.4796	3.7853e-06
55941	Nrbp2	131.43/103.41/126.33	165.95/313.32/226.71	126.33	226.71	0.83863	3.8882e-06
13877	Psmc1	35.319/34.471/38.87	88.33/263.24/35.165	35.319	88.33	1.2984	3.9962e-06
22232	Uchl3	129.12/104.43/95.407	195.4/226.05/112.98	104.43	195.4	0.89751	4.161e-06
33229	Pcyt2	34.74/53.735/57.421	61.563/901.32/118.96	53.735	118.96	1.1321	4.1948e-06
77869	Gm4214	35.319/44.61/49.471	38.365/198.86/104	44.61	104	1.203	4.2601e-06
18260	Tubb5	0.57901/0/5.3004	2.6767/35.767/7.482	0.57901	7.482	2.4254	4.3003e-06
20519	Cops7a	41.109/37.513/38.87	87.438/113.02/94.273	38.87	94.273	1.2568	4.3162e-06
40649	Rptor	27.213/44.61/42.403	42.827/274.69/100.26	42.403	100.26	1.2222	4.3326e-06
47643	Rpn1	8.1061/21.291/21.202	17.844/67.242/62.101	21.202	62.101	1.507	4.4011e-06
16628	Sprr2k	89.167/79.081/67.139	157.92/533.64/88.288	79.081	157.92	0.98879	4.5258e-06
9588	Ksr1	38.793/41.568/59.188	26.767/98.716/117.47	41.568	98.716	1.228	4.5499e-06
5130	Erh	22.581/38.527/51.237	32.12/95.855/93.525	38.527	93.525	1.2579	4.5841e-06
37708	Wdr73	39.951/50.693/66.255	80.3/347.65/113.73	50.693	113.73	1.1502	4.6621e-06
75361	Rfx8	124.49/122.68/90.107	127.59/600.88/220.72	122.68	220.72	0.84215	4.676e-06
16842	Wnt8a	109.43/109.5/106.89	140.97/549.38/202.01	109.43	202.01	0.87842	4.6925e-06
58754	Fam193a	121.59/104.43/110.43	203.43/237.49/98.014	110.43	203.43	0.8755	4.6929e-06
77757	Gm16501	127.38/91.248/106.89	114.2/286.13/198.27	106.89	198.27	0.88517	4.8199e-06
32610	Iqcf3	67.744/52.721/51.237	116.88/540.79/71.079	52.721	116.88	1.1338	4.847e-06
1666	Bmpr2	45.742/49.679/39.753	25.874/196/105.5	45.742	105.5	1.188	4.8604e-06
8800	Itgae	48.637/74.012/53.004	88.33/117.32/122.71	53.004	117.32	1.1315	4.8794e-06
31700	Ppp6c	60.796/78.068/64.488	49.072/434.92/135.42	64.488	135.42	1.0588	4.8797e-06
68726	Cdk15	208.44/211.9/183.75	161.49/407.74/335.94	208.44	335.94	0.68595	4.9048e-06
27552	Tmem8c	132.01/130.79/132.51	164.17/250.37/233.44	132.01	233.44	0.81764	4.9466e-06
7101	Cfap20	27.213/37.513/52.121	19.629/91.563/103.25	37.513	91.563	1.2651	4.9829e-06
64278	Olfr1105	151.12/106.46/127.21	131.16/294.72/226.71	127.21	226.71	0.82866	5.0159e-06
12068	Ocln	61.375/42.582/27.385	127.59/100.15/35.165	42.582	100.15	1.2146	5.0185e-06
14008	Ptgs2	118.12/106.46/139.58	130.26/457.82/213.99	118.12	213.99	0.85186	5.0215e-06
43467	Ston1	86.851/70.971/70.672	123.13/151.65/145.15	70.971	145.15	1.022	5.2055e-06
4157	Defa25	66.586/65.901/90.107	55.318/161.67/138.42	66.586	138.42	1.0446	5.2367e-06
13507	Ppef2	61.954/71.984/103.36	67.809/427.77/146.65	71.984	146.65	1.0165	5.2703e-06
74672	Taar3	68.902/61.846/69.789	141.86/284.7/26.935	68.902	141.86	1.0312	5.3977e-06
68340	Luzp1	63.112/114.57/74.206	149.89/185.99/50.878	74.206	149.89	1.0046	5.4414e-06
3659	Csrp2	109.43/106.46/110.43	103.5/263.24/201.27	109.43	201.27	0.87309	5.5368e-06
66956	Olfr477	57.322/91.248/66.255	89.222/344.79/137.67	66.255	137.67	1.0439	5.6038e-06
30205	Pfdn1	74.113/68.943/112.19	71.378/224.62/149.64	74.113	149.64	1.004	5.6076e-06
57061	Tiprl	82.798/101.39/89.224	141.86/237.49/172.09	89.224	172.09	0.93992	5.6176e-06
36816	Wrb	68.902/83.137/139.58	103.5/383.42/163.11	83.137	163.11	0.96384	5.6395e-06
45211	Ucn3	51.532/48.666/80.39	73.162/230.34/114.47	51.532	114.47	1.1363	5.6729e-06
32453	Denr	39.951/52.721/41.52	55.318/208.88/98.014	41.52	98.014	1.2195	5.6846e-06
24482	Timm22	65.428/64.887/45.054	52.641/220.32/135.42	64.887	135.42	1.05	5.8254e-06
27439	Lamtor4	61.375/64.887/80.39	56.21/1176/135.42	64.887	135.42	1.05	5.8254e-06
38143	Zfp661	45.163/45.624/67.139	41.934/223.19/104.75	45.624	104.75	1.1815	5.8729e-06
47512	Zc3h10	86.851/77.054/113.96	105.28/432.06/168.35	86.851	168.35	0.94684	5.9888e-06
61244	Serpina3j	64.27/43.596/52.121	83.869/273.26/115.22	52.121	115.22	1.1295	6.0453e-06
62061	Serpinb13	117.54/93.276/90.107	177.55/337.64/104.75	93.276	177.55	0.92139	6.2481e-06
67701	Ehd2	111.17/123.69/130.74	108.85/507.89/220.72	123.69	220.72	0.83037	6.2753e-06
11832	Npm1	21.423/28.388/46.82	13.383/244.65/74.82	28.388	74.82	1.3673	6.4397e-06
12096	Ogdh	8.1061/26.36/40.637	7.1378/246.08/71.079	26.36	71.079	1.3975	6.518e-06
14237	Pex5	73.534/97.331/83.04	100.82/485/162.36	83.04	162.36	0.95891	6.5667e-06
65293	Olfr1215	67.744/74.012/85.69	66.024/253.23/148.89	74.012	148.89	0.99873	6.5741e-06
77077	Tomt	77.008/78.068/128.98	85.653/237.49/154.88	78.068	154.88	0.97926	6.7359e-06
57582	Cerkl	133.75/89.22/93.641	177.55/359.1/79.309	93.641	177.55	0.91581	7.0811e-06
43536	9430038I01Rik	59.059/48.666/98.058	68.701/133.05/125.7	59.059	125.7	1.0769	7.0815e-06
70645	Rft1	13.896/49.679/41.52	13.383/224.62/97.266	41.52	97.266	1.2086	7.4146e-06
49589	Cyb5r3	174.28/131.8/129.86	231.09/937.09/181.81	131.8	231.09	0.80537	7.4693e-06
26902	Ptges	28.371/39.541/38.87	35.689/510.75/92.777	38.87	92.777	1.2339	7.4996e-06
6252	Bloc1s1	54.427/67.929/73.322	83.869/268.97/139.17	67.929	139.17	1.024	7.5496e-06
18908	Wnt5b	167.33/178.44/164.31	207.89/426.34/279.08	167.33	279.08	0.73452	7.6295e-06
27639	Tma7	34.74/25.347/44.17	85.653/184.56/47.885	34.74	85.653	1.2777	7.6532e-06
37647	Endod1	165.02/127.75/136.93	172.2/459.25/237.93	136.93	237.93	0.79267	7.7555e-06
62346	Lrrc7	123.33/81.109/75.089	158.82/211.74/80.806	81.109	158.82	0.96079	7.8116e-06
49759	Ggct	81.061/71.984/55.654	110.64/294.72/145.15	71.984	145.15	1.0018	7.8913e-06
36977	Krtap5-2	21.423/16.222/50.354	33.012/223.19/61.353	21.423	61.353	1.4755	7.9177e-06
6604	Gnao1	197.44/170.33/162.55	282.83/432.06/198.27	170.33	282.83	0.72828	7.9515e-06
35614	Ube2cbp	77.587/90.234/122.79	100.82/214.6/172.09	90.234	172.09	0.92385	8.0157e-06
27023	Fgf23	88.588/106.46/143.99	91.007/287.57/195.28	106.46	195.28	0.86918	8.1598e-06
39077	Camk2n2	107.12/77.054/76.856	152.57/228.91/101.76	77.054	152.57	0.97635	8.2734e-06
1638	Bmp6	58.48/82.123/50.354	70.485/433.49/124.2	58.48	124.2	1.0738	8.4366e-06
12630	Furin	122.75/123.69/145.76	165.06/452.09/219.22	123.69	219.22	0.8206	8.5231e-06
43555	Raph1	78.166/61.846/74.206	91.007/155.94/148.14	74.206	148.14	0.98779	8.6488e-06
23872	Hes6	95.536/99.359/110.43	95.468/423.48/184.81	99.359	184.81	0.88863	8.8654e-06
55446	Cep170b	191.65/153.09/159.01	186.47/422.05/267.11	159.01	267.11	0.74463	8.8661e-06
48199	Csdc2	65.428/76.04/61.838	82.977/319.04/134.68	65.428	134.68	1.0303	9.0911e-06
20141	Hsf4	93.22/92.262/103.36	125.8/203.16/175.83	93.22	175.83	0.90824	9.1987e-06
28897	Uba5	64.849/67.929/83.04	63.348/197.43/138.42	67.929	138.42	1.0162	9.2699e-06
46069	Med15	56.743/67.929/68.905	71.378/224.62/138.42	67.929	138.42	1.0162	9.2699e-06
63419	4930415L06Rik	105.38/92.262/85.69	96.36/244.65/174.33	92.262	174.33	0.91073	9.4438e-06
74714	Klri1	125.07/167.29/128.98	157.92/446.37/225.96	128.98	225.96	0.80417	9.5457e-06
25874	Pglyrp2	119.85/131.8/110.43	80.3/440.65/213.24	119.85	213.24	0.82594	9.7527e-06
43315	Rbm17	29.529/75.026/111.31	59.779/208.88/148.89	75.026	148.89	0.97936	9.7965e-06
76704	Vmn1r91	114.06/115.58/126.33	135.62/244.65/207.25	115.58	207.25	0.837	9.8175e-06
16101	Slfn2	92.641/110.51/106.01	116.88/403.45/193.78	106.01	193.78	0.86415	9.8545e-06
78223	Vmn1r88	79.324/83.137/90.107	92.791/164.53/160.86	83.137	160.86	0.94397	9.8691e-06
19572	Gpc6	77.587/67.929/99.824	74.947/238.92/152.63	77.587	152.63	0.96713	9.9728e-06
29984	Zfp787	135.49/137.89/101.59	234.65/557.96/70.331	135.49	234.65	0.7879	9.9816e-06
3558	Crygf	19.686/26.36/26.502	30.336/70.103/73.324	26.36	70.103	1.3778	1.0027e-05
18366	Uba1	9.2641/21.291/22.968	7.1378/323.33/60.604	21.291	60.604	1.4666	1.0076e-05
58598	Eif4g3	82.798/76.04/106.89	55.318/160.24/179.57	82.798	160.24	0.94418	1.0192e-05
4560	Dyrk1a	170.23/164.25/151.06	192.72/725.35/273.09	164.25	273.09	0.73005	1.0587e-05
2060	Car3	50.953/48.666/53.888	36.581/201.72/111.48	50.953	111.48	1.1144	1.0912e-05
57970	Otol1	88.588/95.303/99.824	100.82/482.14/178.07	95.303	178.07	0.89488	1.0944e-05
56158	Tmem44	137.22/97.331/163.43	192.72/444.94/236.43	137.22	236.43	0.7805	1.1178e-05
63264	AI118078	88.588/47.652/70.672	141.86/160.24/38.907	70.672	141.86	0.99515	1.1191e-05
8447	Ikbkg	26.634/21.291/38.87	30.336/131.62/70.331	26.634	70.331	1.3681	1.1281e-05
39774	Kif2c	37.056/55.763/59.188	50.857/243.21/118.96	55.763	118.96	1.0796	1.1311e-05
3967	Dab2	196.86/121.66/130.74	141.86/296.15/227.45	130.74	227.45	0.79417	1.1456e-05
47285	Mtus1	116.96/123.69/145.76	128.48/502.17/217.73	123.69	217.73	0.81077	1.1526e-05
36212	Ccdc93	78.166/69.957/63.605	69.593/412.03/140.66	69.957	140.66	0.99744	1.1568e-05
26874	Trpv6	73.534/83.137/93.641	74.054/567.98/160.12	83.137	160.12	0.93728	1.1855e-05
50859	Nek8	20.844/30.416/23.852	24.982/82.979/65.094	23.852	65.094	1.4112	1.1887e-05
42521	Vmn2r29	81.061/82.123/113.96	74.947/180.26/158.62	82.123	158.62	0.94131	1.1889e-05
69462	Wdr59	97.273/82.123/75.089	74.947/181.7/158.62	82.123	158.62	0.94131	1.1889e-05
64935	Olfr574	140.7/76.04/74.206	122.23/442.08/149.64	76.04	149.64	0.96743	1.1912e-05
55081	Nr1d1	105.38/81.109/72.439	87.438/586.58/157.12	81.109	157.12	0.94543	1.1915e-05
17371	Tead4	121.59/102.4/81.273	90.114/327.62/187.8	102.4	187.8	0.86861	1.1943e-05
46883	Slc44a1	160.38/139.91/176.68	140.08/532.21/267.11	160.38	267.11	0.73231	1.2268e-05
49334	Rbm15b	63.691/84.151/62.722	62.455/622.34/130.94	63.691	130.94	1.0282	1.2299e-05
24287	Acin1	145.91/147.01/154.6	158.82/273.26/249.15	147.01	249.15	0.7571	1.2348e-05
10205	Smad3	116.38/99.359/142.23	115.1/241.78/207.25	116.38	207.25	0.82714	1.2368e-05
8480	Il12rb2	78.166/105.44/68.022	102.61/165.96/152.63	78.166	152.63	0.95654	1.2385e-05
4738	Egf	120.43/109.5/112.19	103.5/291.86/201.27	112.19	201.27	0.83748	1.2755e-05
29011	Actr2	82.219/107.47/143.99	71.378/194.57/265.61	107.47	194.57	0.8504	1.2969e-05
19486	Klf6	172.54/192.63/162.55	149.89/440.65/282.82	172.54	282.82	0.70968	1.3166e-05
33090	Tmed10	100.75/87.192/92.757	113.31/449.23/173.58	92.757	173.58	0.89691	1.3254e-05
20066	Ceacam1	104.8/53.735/65.372	134.73/0/133.18	65.372	133.18	1.0155	1.3419e-05
71890	Lrrc24	81.64/51.707/55.654	140.08/37.198/118.22	55.654	118.22	1.0733	1.3436e-05
25574	Brd4	22.002/27.374/10.601	27.659/193.14/61.353	22.002	61.353	1.4387	1.3473e-05
72452	Pdp1	130.86/155.12/128.09	126.7/497.87/226.71	130.86	226.71	0.78821	1.3645e-05
74693	Rnase13	99.589/67.929/91.874	104.39/476.41/172.09	91.874	172.09	0.89815	1.3967e-05
47446	Nudt10	94.378/68.943/63.605	138.29/171.68/71.079	68.943	138.29	0.99389	1.4472e-05
55937	Ccdc166	51.532/46.638/74.206	61.563/170.25/111.48	51.532	111.48	1.0984	1.4507e-05
48750	Jmjd6	66.586/62.86/90.107	134.73/446.37/101.01	66.586	134.73	1.0059	1.4535e-05
7905	Hp1bp3	103.64/90.234/67.139	169.52/565.12/56.863	90.234	169.52	0.90231	1.4649e-05
78297	Kifc1	86.851/89.22/75.973	49.072/320.47/164.6	86.851	164.6	0.91461	1.4767e-05
42843	Lsm8	49.216/36.499/75.973	24.982/472.12/107.74	49.216	107.74	1.1147	1.4795e-05
6834	Lancl1	105.38/72.998/101.59	99.929/456.38/185.55	101.59	185.55	0.86269	1.5193e-05
15701	Ostf1	54.427/59.818/79.506	50.857/397.73/124.2	59.818	124.2	1.0417	1.5387e-05
9182	Kif12	60.796/47.652/76.856	76.731/148.79/125.7	60.796	125.7	1.0358	1.541e-05
33805	Nupr1l	90.325/78.068/90.107	95.468/276.12/169.09	90.107	169.09	0.90069	1.5506e-05
62758	H1fx	67.744/42.582/83.04	80.3/137.34/136.17	67.744	136.17	0.99669	1.5749e-05
4561	Dyrk1b	132.01/119.64/104.24	210.56/821.21/101.01	119.64	210.56	0.81043	1.5774e-05
39626	Psma8	112.91/83.137/98.058	103.5/194.57/180.32	98.058	180.32	0.87217	1.599e-05
29033	Klhl10	86.272/91.248/127.21	131.16/183.13/170.59	91.248	170.59	0.89538	1.6023e-05
3117	Cnr1	55.585/63.873/102.47	71.378/174.54/130.19	63.873	130.19	1.0159	1.6328e-05
12592	Pck1	83.956/101.39/94.524	70.485/213.17/175.08	94.524	175.08	0.88229	1.6757e-05
38960	Setd5	85.693/78.068/98.941	130.26/244.65/162.36	85.693	162.36	0.91407	1.6888e-05
1778	Bub1b	26.055/42.582/33.569	9.8144/497.87/81.554	33.569	81.554	1.2558	1.6922e-05
394	Adra2a	42.847/80.095/64.488	40.15/814.05/130.94	64.488	130.94	1.0105	1.7173e-05
73008	Kctd16	81.64/93.276/80.39	71.378/247.51/156.37	81.64	156.37	0.92929	1.7291e-05
23779	Otud5	57.901/78.068/135.16	60.671/339.07/151.14	78.068	151.14	0.94421	1.7341e-05
52123	Skint3	182.97/131.8/131.63	176.66/769.7/226.71	131.8	226.71	0.77789	1.7472e-05
10736	Marcksl1	100.17/82.123/79.506	157.03/334.78/106.99	82.123	157.03	0.92689	1.7489e-05
62903	Ggn	68.902/54.749/63.605	129.37/553.67/91.281	63.605	129.37	1.0129	1.8254e-05
33156	Cfap57	68.902/59.818/85.69	48.18/137.34/143.65	68.902	137.34	0.98486	1.8291e-05
55580	Rasa1	66.586/74.012/67.139	78.515/317.61/134.68	67.139	134.68	0.99363	1.8406e-05
12416	Oxtr	60.796/52.721/85.69	54.425/216.03/124.95	60.796	124.95	1.0273	1.9003e-05
30310	Smc6	57.901/59.818/70.672	58.887/449.23/123.45	59.818	123.45	1.033	1.9007e-05
17066	Taf6	52.111/42.582/61.838	85.653/208.88/111.48	52.111	111.48	1.0826	1.914e-05
12229	Olfr52	67.165/30.416/52.121	71.378/317.61/111.48	52.121	111.48	1.0823	1.9232e-05
47295	Fam192a	57.901/48.666/67.139	120.45/143.07/59.856	57.901	120.45	1.044	1.9325e-05
2656	Cdkn1a	123.33/108.48/177.56	162.38/214.6/265.61	123.33	214.6	0.79421	1.938e-05
72175	Dnph1	125.07/68.943/73.322	143.65/519.33/109.24	73.322	143.65	0.96067	1.9633e-05
47722	Acly	78.745/101.39/120.14	54.425/213.17/184.06	101.39	184.06	0.85395	1.9736e-05
15615	Spi1	11.001/27.374/33.569	17.844/200.29/70.331	27.374	70.331	1.3299	1.9828e-05
47359	Dennd4a	96.115/95.303/128.09	54.425/289/176.58	96.115	176.58	0.87067	1.988e-05
47628	Inca1	34.161/41.568/53.004	36.581/94.424/98.014	41.568	94.424	1.1646	2.0283e-05
51069	Zfp287	65.428/37.513/42.403	66.024/487.86/95.77	42.403	95.77	1.1568	2.0401e-05
4781	Ei24	68.902/51.707/44.17	110.64/248.94/87.54	51.707	110.64	1.0827	2.041e-05
37350	1700001F09Rik	17.949/25.347/30.919	28.551/276.12/66.59	25.347	66.59	1.3592	2.0656e-05
29107	Zfp474	79.903/119.64/93.641	92.791/286.13/172.83	93.641	172.83	0.87718	2.0902e-05
1993	Cap1	42.268/34.471/40.637	40.15/519.33/92.777	40.637	92.777	1.1714	2.1125e-05
43316	Lypd5	89.746/75.026/78.623	73.162/509.32/151.14	78.623	151.14	0.93412	2.117e-05
72277	Hjurp	4.6321/15.208/24.735	16.952/233.2/47.137	15.208	47.137	1.5704	2.1286e-05
48890	Eif2b3	37.056/33.458/58.305	22.306/90.132/86.791	37.056	86.791	1.2059	2.1557e-05
12350	Orm2	78.166/54.749/86.573	99.929/183.13/150.39	78.166	150.39	0.9353	2.1589e-05
7324	H3f3b	35.319/37.513/30.036	83.869/94.424/20.201	35.319	83.869	1.2245	2.1611e-05
17314	Tcte1	114.64/103.41/140.46	114.2/424.91/202.01	114.64	202.01	0.8119	2.2006e-05
70449	Lrif1	114.64/99.359/142.23	121.34/327.62/202.01	114.64	202.01	0.8119	2.2006e-05
37806	Fndc3b	108.27/120.65/137.81	125.8/263.24/210.24	120.65	210.24	0.79618	2.2161e-05
20073	Ceacam10	151.7/138.9/153.71	140.97/291.86/252.14	151.7	252.14	0.72926	2.224e-05
66392	Olfr1109	82.219/86.179/68.905	156.14/0/159.37	82.219	156.14	0.91705	2.2383e-05
43651	Spns3	104.22/68.943/86.573	162.38/238.92/58.36	86.573	162.38	0.8997	2.2597e-05
3944	Cyp4b1	71.218/93.276/69.789	48.18/311.89/139.91	71.218	139.91	0.96439	2.2967e-05
46125	Ddx50	107.7/95.303/99.824	181.12/1168.9/148.14	99.824	181.12	0.85305	2.3138e-05
44171	Ntf5	125.64/110.51/107.78	124.02/429.2/196.03	110.51	196.03	0.82122	2.3231e-05
7750	Hnrnpk	14.475/14.194/14.134	19.629/227.48/44.892	14.194	44.892	1.5947	2.327e-05
41320	Tmbim7	96.115/84.151/96.291	76.731/394.87/175.83	96.115	175.83	0.86457	2.344e-05
56386	Adgrf5	80.482/54.749/66.255	91.899/165.96/132.43	66.255	132.43	0.98838	2.3474e-05
16310	Sod1	32.424/60.832/68.905	24.982/140.21/124.2	60.832	124.2	1.0178	2.3739e-05
14505	Rbl2	129.7/103.41/139.58	150.79/277.55/222.22	129.7	222.22	0.77221	2.3789e-05
47037	Snx21	56.164/37.513/50.354	107.96/414.9/48.633	50.354	107.96	1.0852	2.4102e-05
69257	Hist1h2an	42.268/40.555/90.107	45.503/291.86/95.022	42.268	95.022	1.1501	2.4294e-05
16394	Sox7	104.22/76.04/104.24	84.761/370.54/187.05	104.22	187.05	0.83769	2.4326e-05
66952	Olfr481	129.7/99.359/82.156	180.23/682.43/51.626	99.359	180.23	0.85264	2.4348e-05
31603	Derl1	43.426/58.804/56.538	25.874/294.72/117.47	56.538	117.47	1.0419	2.4864e-05
69227	Hist3h2a	94.378/87.192/95.407	173.09/331.92/56.115	94.378	173.09	0.86811	2.4914e-05
14368	Rad50	44.584/45.624/73.322	39.258/337.64/100.26	45.624	100.26	1.1189	2.5663e-05
2685	Cdr2	148.8/91.248/110.43	195.4/363.39/166.1	110.43	195.4	0.81769	2.5797e-05
57186	Actr1b	91.483/66.915/119.26	73.162/168.82/177.32	91.483	168.82	0.87674	2.5821e-05
62369	Atp6v0d2	78.166/67.929/99.824	70.485/175.97/149.64	78.166	149.64	0.92816	2.5894e-05
24343	Actr8	17.949/40.555/41.52	17.844/258.95/92.029	40.555	92.029	1.1627	2.5987e-05
76416	Zfp784	57.322/74.012/60.955	124.02/221.75/84.547	60.955	124.02	1.0129	2.6274e-05
29368	1200014J11Rik	96.694/147.01/100.71	114.2/181.7/193.04	100.71	181.7	0.84501	2.6683e-05
60870	Ofd1	145.91/149.04/192.58	282.83/247.51/209.5	149.04	247.51	0.72795	2.6937e-05
43530	Ptgr2	77.587/105.44/86.573	59.779/220.32/161.61	86.573	161.61	0.89287	2.6999e-05
15093	Rtn2	121.01/143.97/94.524	209.67/230.34/53.122	121.01	209.67	0.78797	2.73e-05
37143	Rgs12	96.694/119.64/99.824	98.144/563.69/180.32	99.824	180.32	0.84667	2.7489e-05
40279	Stk40	55.585/72.998/62.722	66.024/175.97/126.45	62.722	126.45	1	2.8079e-05
35626	Ppp4r1	90.904/74.012/106.01	134.73/580.85/167.6	90.904	167.6	0.87538	2.8226e-05
59218	Iqsec1	79.903/95.303/90.99	122.23/592.3/167.6	90.99	167.6	0.87402	2.901e-05
3786	Cybb	127.96/88.206/89.224	165.06/218.89/50.13	89.224	165.06	0.88013	2.9155e-05
26209	Chst11	101.33/75.026/58.305	144.54/161.67/101.01	75.026	144.54	0.93685	2.9359e-05
33583	Cd177	114.06/114.57/108.66	185.58/313.32/199.77	114.06	199.77	0.8031	2.9394e-05
61636	Gpr156	170.81/121.66/127.21	217.7/706.75/130.94	127.21	217.7	0.77046	2.9492e-05
36515	Uvssa	64.849/39.541/79.506	55.318/258.95/129.44	64.849	129.44	0.98615	2.9648e-05
64615	Olfr1311	134.91/143.97/158.13	102.61/436.36/240.17	143.97	240.17	0.73433	2.9829e-05
1292	Atp6v1e1	45.163/63.873/75.089	38.365/261.81/127.94	63.873	127.94	0.99103	2.9914e-05
62383	Lingo2	71.218/64.887/64.488	46.395/350.51/129.44	64.887	129.44	0.9853	3.0103e-05
37882	Ddx42	50.953/67.929/68.905	55.318/233.2/133.93	67.929	133.93	0.96901	3.0476e-05
45325	Gtf2a1	71.797/72.998/108.66	104.39/809.76/141.41	72.998	141.41	0.94449	3.0519e-05
38739	2700094K13Rik	169.07/124.71/143.99	240.01/529.35/138.42	143.99	240.01	0.73308	3.0902e-05
9349	Klk1b27	118.12/118.62/138.69	89.222/383.42/205.76	118.62	205.76	0.78944	3.0967e-05
9773	Lepr	92.641/80.095/81.273	68.701/752.53/153.38	81.273	153.38	0.90801	3.1075e-05
3286	Cox5a	77.587/49.679/51.237	52.641/177.4/108.49	51.237	108.49	1.0676	3.1099e-05
57950	Clrn1	200.92/224.06/184.63	211.46/728.21/314.24	200.92	314.24	0.64272	3.129e-05
69759	Taf2	22.581/46.638/40.637	41.042/91.563/159.37	40.637	91.563	1.1526	3.1742e-05
48917	Skiv2l	119.28/135.86/113.08	114.2/500.74/206.5	119.28	206.5	0.7868	3.1848e-05
49126	Oxsr1	55.585/90.234/101.59	106.17/363.39/166.1	90.234	166.1	0.87308	3.1866e-05
60627	Prss42	79.324/78.068/95.407	129.37/217.46/150.39	79.324	150.39	0.91435	3.2385e-05
27598	Tmem14c	73.534/52.721/49.471	110.64/148.79/50.878	52.721	110.64	1.0552	3.2587e-05
34246	Pxt1	104.22/80.095/80.39	110.64/175.97/151.89	80.39	151.89	0.90953	3.2731e-05
68146	Stk32a	113.49/100.37/84.807	180.23/324.76/102.5	100.37	180.23	0.83814	3.2958e-05
14212	Pex19	104.22/121.66/64.488	185.58/340.5/88.288	104.22	185.58	0.82638	3.3039e-05
71935	Ccnjl	104.22/93.276/128.09	93.683/314.75/185.55	104.22	185.55	0.82617	3.3229e-05
5883	Fth1	103.64/85.165/83.04	106.17/286.13/158.62	85.165	158.62	0.88946	3.3748e-05
7251	H2-M9	99.01/84.151/83.04	74.054/517.9/157.12	84.151	157.12	0.89295	3.4091e-05
19886	Sh3yl1	116.38/120.65/141.34	103.5/379.13/208	120.65	208	0.78077	3.4255e-05
58028	Ints3	14.475/33.458/25.619	12.491/70.103/65.842	25.619	65.842	1.3283	3.4855e-05
55209	Rhbdf2	77.587/81.109/92.757	90.114/201.72/152.63	81.109	152.63	0.90387	3.5035e-05
24533	Hsd17b12	62.533/80.095/85.69	98.144/608.04/151.14	80.095	151.14	0.90768	3.5317e-05
1844	Hyou1	55.585/60.832/89.224	73.162/529.35/122.71	60.832	122.71	1.0005	3.5688e-05
19807	Twf2	74.692/77.054/81.273	100.82/184.56/146.65	77.054	146.65	0.91962	3.6049e-05
21955	Fbxo18	119.85/63.873/90.107	139.19/168.82/165.35	90.107	165.35	0.86861	3.6149e-05
44516	Pus7l	57.901/41.568/68.905	78.515/473.55/118.22	57.901	118.22	1.0172	3.6174e-05
48732	Tm6sf1	77.587/65.901/92.757	48.18/240.35/147.4	77.587	147.4	0.91709	3.6268e-05
74870	Hpse2	130.28/103.41/137.81	116.88/1045.8/220.72	130.28	220.72	0.75613	3.6371e-05
38399	2210016L21Rik	86.851/47.652/67.139	132.05/226.05/74.072	67.139	132.05	0.96541	3.6534e-05
77379	Gm11563	134.91/101.39/86.573	181.12/185.99/83.799	101.39	181.12	0.83087	3.6772e-05
49758	Ggct	90.904/60.832/81.273	88.33/303.3/152.63	81.273	152.63	0.901	3.7016e-05
38719	Mex3a	50.374/78.068/52.121	48.18/148.79/109.24	52.121	109.24	1.0533	3.7341e-05
56671	Cplx4	61.954/74.012/60.071	41.934/422.05/124.2	61.954	124.2	0.99189	3.7577e-05
13261	Prl7d1	62.533/209.87/121.03	49.964/477.84/208	121.03	208	0.77631	3.7777e-05
59465	Arhgap35	92.062/55.763/58.305	118.67/88.702/131.68	58.305	118.67	1.0128	3.7846e-05
60947	Cdk17	63.691/56.776/58.305	118.67/440.65/74.072	58.305	118.67	1.0128	3.7846e-05
11700	Mrpl40	38.214/58.804/45.937	24.09/223.19/99.511	45.937	99.511	1.0986	3.7901e-05
69604	Ankar	99.01/65.901/71.556	99.036/175.97/138.42	71.556	138.42	0.94225	3.7913e-05
94	Aco1	71.218/89.22/71.556	71.378/161.67/138.42	71.556	138.42	0.94225	3.7913e-05
13453	Pou3f4	85.114/89.22/95.407	82.977/311.89/163.86	89.22	163.86	0.86969	3.8113e-05
26980	Fcamr	57.322/69.957/68.022	49.964/190.28/133.18	68.022	133.18	0.95904	3.8222e-05
32025	Atp2b1	27.792/40.555/35.336	53.533/479.28/82.302	35.336	82.302	1.197	3.823e-05
51208	Rtkn2	55.585/54.749/64.488	83.869/174.54/114.47	55.585	114.47	1.0291	3.8338e-05
4048	Dclk1	123.33/151.07/112.19	133.83/831.22/210.99	123.33	210.99	0.76986	3.8735e-05
15514	Selenbp2	45.163/79.081/60.071	71.378/138.78/121.21	60.071	121.21	1.0008	3.921e-05
58372	Glis1	143.01/132.82/122.79	106.17/321.9/223.71	132.82	223.71	0.74783	3.9288e-05
75130	Ccpg1os	70.639/59.818/80.39	20.521/240.35/136.92	70.639	136.92	0.94503	3.9355e-05
18419	Usp5	0/0/12.368	9.8144/0/6.7338	0.57901	6.7338	2.2922	3.9571e-05
38955	Ccdc94	39.951/37.513/88.34	31.228/141.64/89.784	39.951	89.784	1.1485	3.9574e-05
9464	Mafb	167.91/131.8/145.76	240.9/745.38/138.42	145.76	240.9	0.72094	3.9868e-05
29523	Dsn1	42.847/42.582/69.789	59.779/94.424/100.26	42.847	94.424	1.1219	3.993e-05
40229	Errfi1	66.586/53.735/40.637	43.719/158.8/111.48	53.735	111.48	1.0392	4.0069e-05
75419	Vmn2r116	100.17/105.44/122.79	104.39/343.36/186.3	105.44	186.3	0.8153	4.033e-05
72008	Serpina11	67.165/86.179/60.955	81.192/253.23/131.68	67.165	131.68	0.96089	4.0505e-05
56521	Gjd4	92.062/96.317/86.573	91.899/185.99/167.6	92.062	167.6	0.85732	4.0514e-05
69887	Ptpn7	168.49/118.62/102.47	204.32/254.66/107.74	118.62	204.32	0.77938	4.0867e-05
71391	Serpina7	80.482/96.317/82.156	153.46/299.01/62.849	82.156	153.46	0.89335	4.0986e-05
31376	Lce1h	226.39/118.62/185.51	292.65/718.2/182.56	185.51	292.65	0.6548	4.1086e-05
33890	Sult1c2	104.8/86.179/103.36	73.162/234.63/183.31	103.36	183.31	0.82059	4.1217e-05
59377	Cpa2	61.954/55.763/55.654	42.827/173.11/114.47	55.763	114.47	1.0246	4.137e-05
40159	Sash3	40.53/38.527/63.605	26.767/250.37/90.532	40.53	90.532	1.1401	4.2123e-05
46708	4933434E20Rik	87.43/84.151/100.71	81.192/277.55/160.86	87.43	160.86	0.87217	4.2145e-05
32861	Rraga	53.848/80.095/75.973	71.378/815.48/144.4	75.973	144.4	0.91764	4.2373e-05
23339	Rragc	53.269/79.081/91.874	44.611/248.94/148.89	79.081	148.89	0.90439	4.2429e-05
47567	Smg6	35.319/58.804/60.071	76.731/158.8/118.96	58.804	118.96	1.0043	4.2883e-05
23438	Atf7ip	60.796/56.776/78.623	34.797/163.1/121.96	60.796	121.96	0.99257	4.2986e-05
58046	Pogz	88.009/92.262/110.43	93.683/329.05/167.6	92.262	167.6	0.85422	4.3065e-05
11360	Napb	92.062/80.095/84.807	157.03/341.93/147.4	84.807	157.03	0.88104	4.31e-05
58080	Trim45	73.534/103.41/78.623	68.701/238.92/148.14	78.623	148.14	0.90545	4.3303e-05
44609	Mrps34	60.217/74.012/80.39	38.365/227.48/141.41	74.012	141.41	0.92486	4.387e-05
21948	Fbxo8	103.64/69.957/70.672	136.51/200.29/99.511	70.672	136.51	0.94005	4.4112e-05
77208	Gm1993	9.8431/26.36/23.852	7.1378/84.41/62.101	23.852	62.101	1.3443	4.4419e-05
8872	Itih4	72.955/66.915/50.354	57.102/150.22/130.94	66.915	130.94	0.95803	4.4601e-05
16175	Smr2	112.91/117.61/94.524	98.144/231.77/196.03	112.91	196.03	0.79056	4.4927e-05
17231	Tcf7	79.903/89.22/159.9	69.593/214.6/163.11	89.22	163.11	0.86313	4.4957e-05
70748	Zfp414	69.481/59.818/69.789	80.3/161.67/134.68	69.481	134.68	0.94487	4.5053e-05
19618	Insrr	65.428/75.026/63.605	71.378/483.57/128.69	65.428	128.69	0.96522	4.5082e-05
40273	Crct1	104.22/94.289/119.26	66.917/200.29/184.06	104.22	184.06	0.81455	4.5158e-05
69733	Vwc2	99.589/98.345/119.26	177.55/254.66/133.93	99.589	177.55	0.82787	4.5909e-05
45974	Hemgn	49.795/47.652/46.82	41.934/101.58/109.99	47.652	101.58	1.0762	4.5957e-05
59059	Radil	92.062/71.984/81.273	151.68/274.69/97.266	81.273	151.68	0.892	4.6174e-05
30021	Mastl	47.479/41.568/37.986	91.899/97.286/58.36	41.568	91.899	1.1259	4.6513e-05
24397	Styx	97.273/93.276/90.107	168.63/512.18/91.281	93.276	168.63	0.84743	4.6873e-05
21598	Reg3d	140.12/89.22/113.08	132.94/201.72/196.03	113.08	196.03	0.78842	4.7001e-05
64494	Olfr1148	47.479/26.36/37.986	37.473/207.45/86.043	37.986	86.043	1.1588	4.7413e-05
1632	Bmp4	66.007/39.541/45.937	60.671/470.69/98.763	45.937	98.763	1.0878	4.7695e-05
57823	Pcif1	67.744/53.735/60.071	74.054/150.22/120.46	60.071	120.46	0.99192	4.7929e-05
67183	Olfr206	92.062/67.929/76.856	91.899/194.57/145.15	76.856	145.15	0.90858	4.8058e-05
76536	Mthfd2l	79.324/48.666/51.237	49.964/274.69/106.99	51.237	106.99	1.0478	4.8167e-05
13951	Ptcra	172.54/83.137/124.56	211.46/673.85/143.65	124.56	211.46	0.75879	4.8483e-05
35485	Nars	20.265/43.596/26.502	9.8144/71.534/66.59	26.502	66.59	1.2973	4.8618e-05
48381	Catsperd	112.33/117.61/147.53	115.1/473.55/202.01	117.61	202.01	0.77538	4.8768e-05
15103	Ruvbl2	59.638/43.596/93.641	77.623/392/119.71	59.638	119.71	0.99329	4.9178e-05
25019	2019-09-06	81.061/82.123/87.457	152.57/1284.7/71.827	82.123	152.57	0.88557	4.9729e-05
13521	Sypl	53.269/45.624/108.66	28.551/231.77/109.99	53.269	109.99	1.0322	5.0012e-05
17812	Tnfrsf11a	61.375/62.86/75.973	65.132/124.47/137.67	62.86	124.47	0.97435	5.0044e-05
40745	4933402D24Rik	90.325/95.303/79.506	164.17/218.89/157.12	90.325	164.17	0.85486	5.0134e-05
2659	Cdkn1b	111.17/79.081/99.824	145.43/177.4/186.3	99.824	177.4	0.8233	5.0659e-05
64071	Olfr317	77.587/41.568/44.17	61.563/214.6/95.77	44.17	95.77	1.0992	5.0761e-05
69664	Tigar	77.587/99.359/70.672	149/145.93/34.417	77.587	145.93	0.90275	5.1287e-05
23230	Deaf1	104.22/132.82/136.93	99.036/277.55/222.22	132.82	222.22	0.73819	5.144e-05
5803	Fosb	82.798/107.47/82.156	79.408/406.31/153.38	82.798	153.38	0.88151	5.1473e-05
67636	Olfr638	96.694/115.58/104.24	84.761/196/183.31	104.24	183.31	0.80843	5.2838e-05
13574	Ppp2cb	100.17/129.77/104.24	130.26/596.59/183.31	104.24	183.31	0.80843	5.2838e-05
57494	1700019L03Rik	93.799/114.57/104.24	58.887/187.42/183.31	104.24	183.31	0.80843	5.2838e-05
53435	Zfp748	78.745/56.776/51.237	115.1/144.5/42.648	56.776	115.1	1.0068	5.3322e-05
36293	Efcab3	86.851/54.749/62.722	124.02/427.77/92.777	62.722	124.02	0.97229	5.3325e-05
32652	Ddx39	56.164/87.192/83.04	51.749/652.39/153.38	83.04	153.38	0.87735	5.5637e-05
57668	Vps18	48.058/85.165/98.058	66.917/470.69/156.37	85.165	156.37	0.86903	5.5963e-05
23316	Rasa4	66.007/64.887/69.789	107.96/456.38/128.69	66.007	128.69	0.9527	5.6059e-05
1434	Bcl6b	110.59/109.5/118.38	124.91/191.71/200.52	110.59	191.71	0.78822	5.6249e-05
12450	P4ha1	74.113/83.137/83.923	153.46/184.56/123.45	83.137	153.46	0.87644	5.6363e-05
75613	Fscb	92.641/84.151/82.156	37.473/1084.5/154.88	84.151	154.88	0.87232	5.6685e-05
4498	Epyc	88.009/65.901/55.654	128.48/194.57/61.353	65.901	128.48	0.95262	5.6846e-05
70563	Zfp616	108.85/44.61/67.139	130.26/214.6/66.59	67.139	130.26	0.94593	5.7385e-05
77263	Gm14920	168.49/120.65/112.19	205.21/472.12/124.2	120.65	205.21	0.76138	5.8041e-05
8395	Cyr61	55.006/22.305/22.968	53.533/135.91/59.856	22.968	59.856	1.3443	5.8713e-05
37797	Lmntd2	103.64/56.776/63.605	66.024/314.75/124.95	63.605	124.95	0.96313	5.8834e-05
59620	Ffar2	76.429/69.957/92.757	57.102/440.65/143.65	76.429	143.65	0.90167	5.9098e-05
35195	Zfp715	146.49/90.234/89.224	163.28/479.28/92.029	90.234	163.28	0.84848	5.9135e-05
39460	1700066B19Rik	82.219/78.068/116.61	125.8/160.24/151.89	82.219	151.89	0.87746	5.99e-05
7514	Hey1	96.115/112.54/90.99	89.222/530.78/171.34	96.115	171.34	0.82747	6.1165e-05
65367	Olfr891	71.797/117.61/78.623	130.26/344.79/146.65	78.623	146.65	0.8909	6.1304e-05
69027	Zfp385c	85.114/67.929/51.237	131.16/174.54/83.799	67.929	131.16	0.93906	6.1336e-05
74935	Lce3a	75.85/90.234/100.71	97.252/163.1/163.86	90.234	163.1	0.8469	6.1463e-05
68010	Lrrc16b	138.96/146/169.61	182.91/739.66/238.68	146	238.68	0.70531	6.1477e-05
32018	Tppp3	97.273/48.666/62.722	73.162/227.48/123.45	62.722	123.45	0.96575	6.1717e-05
63293	Snx14	63.112/75.026/102.47	82.977/247.51/141.41	75.026	141.41	0.90549	6.2269e-05
40928	Mau2	66.007/89.22/106.89	117.77/656.68/161.61	89.22	161.61	0.84991	6.2274e-05
20681	Pla2g2e	64.849/89.22/105.12	66.917/650.96/161.61	89.22	161.61	0.84991	6.2274e-05
66910	Olfr1348	69.481/55.763/55.654	59.779/460.68/112.98	55.763	112.98	1.0058	6.2528e-05
35771	Polr3b	52.111/72.998/85.69	48.18/289/138.42	72.998	138.42	0.91385	6.3194e-05
7465	Hbegf	204.97/153.09/158.13	140.08/329.05/254.39	158.13	254.39	0.6825	6.3444e-05
45639	Gpr45	65.428/62.86/89.224	129.37/127.33/81.554	65.428	127.33	0.95	6.3705e-05
65881	Olfr123	94.957/67.929/100.71	169.52/211.74/83.799	94.957	169.52	0.8295	6.3828e-05
21638	Pdlim4	64.849/75.026/73.322	67.809/138.78/143.65	73.322	138.78	0.91124	6.4888e-05
55407	9030617O03Rik	199.18/127.75/121.91	214.13/226.05/173.58	127.75	214.13	0.74069	6.4986e-05
23433	Slc23a2	64.849/65.901/96.291	97.252/183.13/127.94	65.901	127.94	0.94662	6.5066e-05
76174	Lce1k	101.33/55.763/71.556	89.222/197.43/136.17	71.556	136.17	0.91884	6.5551e-05
55969	Eif3l	33.582/62.86/30.919	57.102/543.66/77.813	33.582	77.813	1.1884	6.652e-05
48075	Mmrn2	86.272/101.39/83.04	114.2/692.45/157.12	86.272	157.12	0.85745	6.7015e-05
2220	Cbx1	75.85/115.58/124.56	105.28/347.65/197.53	115.58	197.53	0.768	6.7803e-05
74702	Rnase12	144.17/141.94/167.85	127.59/392/235.68	144.17	235.68	0.70519	6.7918e-05
32024	Atp2b1	70.06/66.915/83.04	133.83/436.36/115.97	70.06	133.83	0.92407	6.8227e-05
30244	Cmtm6	77.008/60.832/76.856	143.65/200.29/121.21	76.856	143.65	0.89366	6.8279e-05
45904	Pcdhb10	63.112/117.61/92.757	71.378/193.14/166.1	92.757	166.1	0.83372	6.8752e-05
20125	Fgd2	112.33/118.62/105.12	127.59/374.84/193.04	112.33	193.04	0.77583	6.8776e-05
63502	Frmpd3	80.482/75.026/79.506	105.28/147.36/155.63	79.506	147.36	0.88192	6.9535e-05
45596	Lmod2	78.745/81.109/91.874	65.132/632.36/149.64	81.109	149.64	0.87549	6.9574e-05
43000	Mdh1b	71.218/67.929/77.739	118.67/207.45/135.42	71.218	135.42	0.91768	6.9741e-05
10493	Mcpt4	113.49/104.43/131.63	89.222/260.38/194.53	113.49	194.53	0.77225	6.9785e-05
28804	Cdip1	108.85/95.303/99.824	124.91/361.96/175.83	99.824	175.83	0.8105	6.9923e-05
14955	Polr1d	34.161/47.652/92.757	33.012/100.15/104	47.652	100.15	1.0559	7.0263e-05
48022	Akr1c18	114.06/93.276/122.79	90.114/446.37/195.28	114.06	195.28	0.77048	7.028e-05
2233	Cbx5	105.38/107.47/133.39	109.74/194.57/186.3	107.47	186.3	0.78808	7.0293e-05
50182	Vmn1r53	160.38/128.76/126.33	215.03/360.53/114.47	128.76	215.03	0.73534	7.0602e-05
50118	Egln2	96.115/62.86/60.955	123.13/133.05/71.079	62.86	123.13	0.95883	7.0722e-05
7716	Hn1	151.7/138.9/142.23	232.87/559.39/98.014	142.23	232.87	0.70739	7.0861e-05
12037	Nr4a2	64.849/111.53/91.874	132.94/238.92/164.6	91.874	164.6	0.8344	7.2674e-05
60312	9230110C19Rik	72.376/94.289/67.139	78.515/216.03/136.92	72.376	136.92	0.91046	7.2815e-05
46641	Commd7	103.64/77.054/57.421	143.65/452.09/50.13	77.054	143.65	0.89	7.2891e-05
6826	Adgrg1	135.49/131.8/125.44	150.79/218.89/219.97	131.8	218.89	0.72752	7.2961e-05
21270	Fam21	83.377/86.179/75.089	64.24/585.15/152.63	83.377	152.63	0.86457	7.3152e-05
21343	Vps25	40.53/51.707/71.556	54.425/214.6/106.24	51.707	106.24	1.0248	7.3201e-05
76178	Cyp4f40	115.22/106.46/98.058	184.69/234.63/92.029	106.46	184.69	0.78915	7.3476e-05
34572	Lyg1	128.54/130.79/143.99	129.37/217.46/224.46	130.79	217.46	0.72916	7.4014e-05
3834	Cyp26a1	147.65/88.206/68.905	120.45/439.22/159.37	88.206	159.37	0.84616	7.4306e-05
28552	Rnf181	78.166/61.846/121.91	43.719/230.34/145.15	78.166	145.15	0.88451	7.436e-05
58374	Glis1	90.904/74.012/77.739	144.54/460.68/83.799	77.739	144.54	0.88626	7.4393e-05
52043	Klf11	76.429/81.109/77.739	144.54/145.93/118.96	77.739	144.54	0.88626	7.4393e-05
47720	Acly	32.424/29.402/32.686	32.12/277.55/75.568	32.424	75.568	1.1958	7.4485e-05
61420	Pnma2	99.01/62.86/63.605	124.02/258.95/44.892	63.605	124.02	0.95243	7.4574e-05
36516	Uvssa	82.798/42.582/45.937	97.252/693.88/29.928	45.937	97.252	1.0658	7.5191e-05
51725	Casc3	104.22/85.165/103.36	145.43/277.55/180.32	103.36	180.32	0.79697	7.5375e-05
29002	Sbds	20.265/15.208/33.569	7.1378/54.366/58.36	20.265	54.366	1.3805	7.5504e-05
48158	Prkaa1	86.851/82.123/121.91	93.683/157.37/168.35	86.851	157.37	0.8502	7.5751e-05
67951	Zbtb1	71.218/83.137/75.089	95.468/546.52/140.66	75.089	140.66	0.89669	7.5774e-05
49303	Krt75	99.589/127.75/98.058	159.71/294.72/175.08	99.589	175.08	0.80775	7.6176e-05
39624	Wdr75	23.739/33.458/19.435	24.982/107.3/60.604	23.739	60.604	1.3162	7.6478e-05
77603	Gm3488	30.687/23.319/18.551	25.874/171.68/59.856	23.319	59.856	1.3233	7.6511e-05
20334	Psmb2	29.529/43.596/64.488	31.228/344.79/93.525	43.596	93.525	1.0838	7.6626e-05
11272	Myo5b	138.38/101.39/103.36	180.23/359.1/68.835	103.36	180.23	0.79627	7.6702e-05
70847	4932418E24Rik	78.745/69.957/77.739	70.485/246.08/144.4	77.739	144.4	0.8849	7.6755e-05
31015	Gpr89	61.375/44.61/50.354	63.348/289/104	50.354	104	1.0318	7.6894e-05
26324	Myot	79.324/99.359/80.39	69.593/230.34/148.14	80.39	148.14	0.87379	7.7377e-05
42835	Plet1	77.008/48.666/58.305	115.99/364.82/37.41	58.305	115.99	0.98015	7.7742e-05
7118	Nkx6-2	114.64/90.234/105.12	102.61/226.05/182.56	105.12	182.56	0.7905	7.8043e-05
42677	Pbp2	69.481/77.054/66.255	88.33/608.04/132.43	69.481	132.43	0.9208	7.8107e-05
58404	Skint6	83.956/98.345/84.807	154.35/515.04/40.403	84.807	154.35	0.8564	7.8113e-05
11982	Ntn3	105.96/102.4/91.874	114.2/214.6/178.82	102.4	178.82	0.79831	7.8143e-05
75486	Gm12695	149.96/149.04/187.28	194.5/430.63/242.42	149.96	242.42	0.68924	7.8468e-05
75349	Gsk3a	117.54/124.71/118.38	91.899/427.77/200.52	118.38	200.52	0.7554	7.8475e-05
40473	Iqcf1	63.691/62.86/58.305	61.563/307.59/122.71	62.86	122.71	0.95393	7.8722e-05
34463	Tmco2	93.799/85.165/104.24	90.114/190.28/166.85	93.799	166.85	0.82422	7.9618e-05
18069	Trh	124.49/86.179/87.457	157.92/231.77/115.22	87.457	157.92	0.84528	8.0839e-05
51779	Stab2	146.49/107.47/104.24	89.222/692.45/185.55	107.47	185.55	0.7823	8.1297e-05
19787	Prkra	88.009/79.081/79.506	82.977/228.91/146.65	79.506	146.65	0.87499	8.1671e-05
68008	Lrrc16b	72.376/98.345/84.807	100.82/296.15/154.13	84.807	154.13	0.85431	8.2034e-05
35069	Rab43	216.55/170.33/197.88	190.04/497.87/303.77	197.88	303.77	0.61581	8.2089e-05
27242	Eefsec	70.06/81.109/88.34	88.33/167.39/148.89	81.109	148.89	0.86831	8.2252e-05
14278	Rab22a	115.8/122.68/102.47	115.1/645.23/196.78	115.8	196.78	0.75982	8.2503e-05
28442	Gtf2h5	146.49/129.77/100.71	207/233.2/215.48	129.77	215.48	0.72716	8.2716e-05
15636	Srsf3	42.847/69.957/41.52	31.228/474.98/92.029	42.847	92.029	1.0852	8.4419e-05
14472	Rasgrp1	110.01/95.303/90.99	168.63/220.32/90.532	95.303	168.63	0.81673	8.4799e-05
7634	Hlx	104.22/104.43/159.01	82.977/323.33/181.06	104.43	181.06	0.78819	8.6809e-05
72034	Stmnd1	126.8/97.331/93.641	171.31/207.45/23.194	97.331	171.31	0.80926	8.7011e-05
45654	Gpnmb	86.851/107.47/88.34	158.82/198.86/42.648	88.34	158.82	0.83902	8.7028e-05
11935	Nrxn3	38.214/35.485/58.305	56.21/440.65/84.547	38.214	84.547	1.1253	8.7672e-05
69393	A530099J19Rik	91.483/117.61/107.78	132.05/339.07/185.55	107.78	185.55	0.77825	8.8092e-05
61732	Cchcr1	99.589/106.46/85.69	109.74/284.7/174.33	99.589	174.33	0.80161	8.8534e-05
1173	Atf2	72.955/52.721/85.69	52.641/158.8/136.92	72.955	136.92	0.89912	8.8642e-05
25475	Lmbr1	108.27/90.234/98.058	172.2/383.42/92.777	98.058	172.2	0.80609	8.8964e-05
58105	St7l	62.533/74.012/111.31	99.036/457.82/138.42	74.012	138.42	0.89421	8.911e-05
2662	Cdkn1c	1.158/2.0277/3.5336	0/12.876/23.942	2.0277	12.876	2.1963	8.9677e-05
32175	Chid1	82.219/72.998/68.022	53.533/147.36/136.92	72.998	136.92	0.89828	8.9944e-05
5895	Fut1	79.903/44.61/40.637	94.575/496.44/67.338	44.61	94.575	1.0673	9.0124e-05
30140	Lipt2	101.33/81.109/98.058	71.378/281.84/172.09	98.058	172.09	0.80515	9.0996e-05
26282	Cysltr1	112.33/136.87/106.89	103.5/263.24/191.54	112.33	191.54	0.76466	9.1339e-05
63718	Neto1	205.55/168.3/189.05	202.53/566.55/291.8	189.05	291.8	0.62354	9.1501e-05
61366	Antxrl	34.161/26.36/55.654	41.934/131.62/77.813	34.161	77.813	1.1644	9.2498e-05
67358	Olfr1414	90.904/111.53/96.291	169.52/185.99/125.7	96.291	169.52	0.80958	9.3387e-05
61560	Pced1b	56.164/64.887/95.407	55.318/403.45/124.95	64.887	124.95	0.93477	9.461e-05
47100	Prrt4	44.584/70.971/61.838	51.749/380.56/120.46	61.838	120.46	0.95077	9.4895e-05
26338	Pvrl3	78.166/92.262/106.89	128.48/474.98/163.86	92.262	163.86	0.82185	9.5104e-05
38174	Supt7l	70.06/74.012/67.139	91.007/155.94/132.43	70.06	132.43	0.909	9.5478e-05
30058	Nop56	26.634/17.236/34.453	22.306/464.97/65.094	26.634	65.094	1.258	9.5862e-05
7808	Hoxb13	149.96/98.345/95.407	172.2/483.57/90.532	98.345	172.2	0.80191	9.6321e-05
37804	Synpr	92.641/91.248/83.04	162.38/668.12/45.64	91.248	162.38	0.82468	9.6374e-05
17226	Tcf4	79.324/38.527/45.054	56.21/207.45/95.022	45.054	95.022	1.06	9.691e-05
29159	Gskip	147.65/134.84/122.79	221.27/243.21/163.86	134.84	221.27	0.71037	9.7191e-05
53775	A630033H20Rik	70.639/54.749/77.739	63.348/393.44/133.18	70.639	133.18	0.90536	9.7485e-05
70710	Gm813	96.115/97.331/104.24	117.77/224.62/170.59	97.331	170.59	0.80325	0.00010054
56344	Adamts10	89.167/69.957/61.838	132.05/208.88/99.511	69.957	132.05	0.90694	0.00010093
17823	Tnfrsf1a	78.745/69.957/69.789	132.05/267.54/108.49	69.957	132.05	0.90694	0.00010093
52578	Tmem63a	50.953/37.513/30.919	82.977/271.83/23.942	37.513	82.977	1.1246	0.0001012
3073	Cnbp	60.796/110.51/81.273	40.15/573.7/148.14	81.273	148.14	0.85821	0.00010215
64957	Olfr1093	126.8/143.97/117.49	226.62/210.31/109.24	126.8	210.31	0.72544	0.00010253
44924	Tmprss5	147.65/105.44/118.38	172.2/429.2/199.02	118.38	199.02	0.74464	0.00010324
31628	Brix1	20.844/15.208/15.901	45.503/65.811/20.201	15.901	45.503	1.4602	0.00010335
73679	H2afy2	196.28/123.69/117.49	206.1/688.15/91.281	123.69	206.1	0.73199	0.0001037
26056	Rad18	119.85/95.303/95.407	167.74/271.83/108.49	95.407	167.74	0.80756	0.00010472
73736	Zfp941	81.061/60.832/62.722	121.34/120.18/139.17	62.722	121.34	0.94107	0.00010539
48391	Ttbk1	92.062/118.62/102.47	107.07/656.68/177.32	102.47	177.32	0.78522	0.00010703
42980	Srxn1	124.49/92.262/85.69	163.28/237.49/71.079	92.262	163.28	0.81677	0.00010718
3874	Cyp2c39	102.48/85.165/108.66	117.77/324.76/177.32	102.48	177.32	0.78509	0.00010731
30998	Cog6	29.529/60.832/47.704	29.443/296.15/98.763	47.704	98.763	1.0345	0.00010736
32485	Hsbp1	65.428/70.971/80.39	74.054/250.37/133.18	70.971	133.18	0.89869	0.00010907
55474	Larp4b	87.43/44.61/59.188	115.99/244.65/75.568	59.188	115.99	0.95882	0.00010937
34807	Mif4gd	74.113/62.86/89.224	75.839/237.49/137.67	74.113	137.67	0.88451	0.00010946
74224	Vmn2r44	53.269/66.915/59.188	48.18/264.67/115.97	59.188	115.97	0.95861	0.00010986
4107	Ddit3	40.53/68.943/45.054	94.575/236.06/54.619	45.054	94.575	1.0533	0.00011053
53574	Chpt1	74.692/77.054/63.605	103.5/206.02/138.42	74.692	138.42	0.8812	0.00011144
21080	Mrpl15	60.796/66.915/86.573	35.689/369.11/127.19	66.915	127.19	0.91653	0.00011245
11727	Nmt1	58.48/82.123/123.68	53.533/675.28/148.89	82.123	148.89	0.8506	0.00011268
43880	Ube2s	151.7/146/200.53	187.37/469.26/242.42	151.7	242.42	0.67273	0.00011323
52370	Dhx37	46.9/64.887/78.623	18.737/167.39/124.2	64.887	124.2	0.92618	0.00011369
50385	Ferd3l	91.483/67.929/71.556	133.83/602.31/86.043	71.556	133.83	0.89402	0.00011395
9931	Sh2b3	149.96/116.59/125.44	207.89/811.19/138.42	125.44	207.89	0.72424	0.00011422
66889	Olfr1282	92.641/98.345/112.19	82.977/264.67/171.34	98.345	171.34	0.79473	0.00011433
49977	Srsf1	8.1061/8.1109/30.919	3.5689/50.074/29.18	8.1109	29.18	1.7279	0.00011507
32546	Efcab2	53.848/35.485/28.269	52.641/87.271/79.309	35.485	79.309	1.1383	0.00011533
22187	Grb14	82.219/77.054/117.49	111.53/490.72/148.89	82.219	148.89	0.84894	0.00011603
24056	Rplp1	8.1061/24.333/31.802	17.844/419.19/60.604	24.333	60.604	1.282	0.00011679
48600	Eprs	15.633/24.333/42.403	29.443/230.34/60.604	24.333	60.604	1.282	0.00011679
39703	Cst6	120.43/74.012/87.457	156.14/234.63/66.59	87.457	156.14	0.82899	0.00011805
68918	Wfdc16	110.59/106.46/129.86	124.91/240.35/187.8	110.59	187.8	0.75864	0.0001186
60986	Ankrd52	108.27/103.41/95.407	132.05/602.31/178.07	103.41	178.07	0.77822	0.00011868
72463	Mup20	174.86/138.9/140.46	195.4/326.19/227.45	140.46	227.45	0.6915	0.000119
8657	Inhba	77.587/88.206/121.03	83.869/440.65/157.12	88.206	157.12	0.82583	0.00011952
38903	Scn2b	96.115/69.957/75.973	99.036/277.55/139.91	75.973	139.91	0.8724	0.00012
58659	Phf13	68.323/86.179/81.273	119.56/197.43/147.4	81.273	147.4	0.85096	0.00012029
47430	Bbs4	106.54/132.82/120.14	90.114/788.3/200.52	120.14	200.52	0.7342	0.0001207
1808	C1qbp	74.692/110.51/90.99	109.74/366.25/160.86	90.99	160.86	0.81522	0.00012256
13730	Prm3	126.8/87.192/87.457	168.63/155.94/99.511	87.457	155.94	0.8272	0.00012298
5908	Fut7	115.8/94.289/136.04	147.22/380.56/194.53	115.8	194.53	0.74335	0.00012469
28192	2310011J03Rik	15.633/23.319/44.17	34.797/58.658/92.029	23.319	58.658	1.2946	0.00012523
29995	Rpl14	6.3691/18.25/12.368	0/453.52/38.158	12.368	38.158	1.5506	0.00012543
62867	Gltscr1	64.849/74.012/82.156	54.425/145.93/136.92	74.012	136.92	0.87865	0.00012564
18418	Usp5	29.529/37.513/37.986	39.258/241.78/82.302	37.513	82.302	1.113	0.00012568
27981	Sec11c	103.06/109.5/135.16	145.43/185.99/197.53	109.5	185.99	0.75893	0.00012628
58705	Nupl2	61.954/48.666/60.071	117.77/0/116.72	60.071	116.72	0.94679	0.00012651
68299	Wdr3	27.213/28.388/53.004	6.2455/493.58/67.338	28.388	67.338	1.2175	0.00012662
32666	Stt3b	101.33/71.984/75.089	66.917/157.37/138.42	75.089	138.42	0.87365	0.00012668
10295	Mal	63.691/109.5/77.739	71.378/731.07/142.16	77.739	142.16	0.86245	0.00012716
23658	Apbb1ip	90.325/85.165/80.39	152.57/516.47/83.799	85.165	152.57	0.83373	0.00012771
35509	Bhlhb9	61.375/60.832/50.354	117.77/414.9/82.302	60.832	117.77	0.94179	0.00012856
21915	Cfhr1	72.376/59.818/76.856	147.22/134.48/76.317	72.376	134.48	0.88474	0.00012862
27162	Arl6ip5	86.851/89.22/67.139	90.114/248.94/154.88	86.851	154.88	0.82728	0.00012884
62845	Gp6	79.903/91.248/74.206	101.71/323.33/145.15	79.903	145.15	0.8532	0.00012887
68868	Timd4	146.49/90.234/119.26	198.97/277.55/133.93	119.26	198.97	0.7336	0.00012905
60243	Aars	13.896/25.347/39.753	2.6767/62.95/62.101	25.347	62.101	1.26	0.00012937
73996	Esp6	93.799/83.137/75.089	80.3/799.75/149.64	83.137	149.64	0.8403	0.00013031
74779	Myh13	73.534/83.137/83.923	86.545/173.11/149.64	83.137	149.64	0.8403	0.00013031
22973	Sec61a1	30.687/40.555/24.735	19.629/188.85/71.079	30.687	71.079	1.1857	0.00013124
39171	Clec4a3	104.8/59.818/62.722	120.45/291.86/41.899	62.722	120.45	0.93051	0.00013146
51558	Vmn1r66	147.07/128.76/113.96	211.46/0/220.72	128.76	211.46	0.71131	0.00013184
73784	Zfp738	58.48/63.873/32.686	114.2/409.17/38.907	58.48	114.2	0.95372	0.00013205
22755	Dnlz	42.847/52.721/31.802	36.581/198.86/90.532	42.847	90.532	1.0618	0.00013259
58314	Megf9	57.322/67.929/72.439	57.994/456.38/127.94	67.929	127.94	0.90355	0.00013344
59356	Caprin2	37.635/39.541/51.237	54.425/133.05/85.295	39.541	85.295	1.0899	0.00013491
53483	Fam193b	98.431/91.248/113.96	108.85/264.67/170.59	98.431	170.59	0.7872	0.00013562
41372	Usp50	114.06/100.37/101.59	174.88/210.31/105.5	101.59	174.88	0.77764	0.00013626
59260	Wnk1	28.95/29.402/42.403	29.443/104.44/68.835	29.402	68.835	1.1998	0.00013633
31018	Gstcd	82.219/63.873/95.407	65.132/231.77/148.14	82.219	148.14	0.84172	0.00013633
63714	Prokr2	175.44/108.48/131.63	215.03/489.29/172.09	131.63	215.03	0.70383	0.00013668
73215	Kng2	198.6/143.97/152.83	242.68/376.27/140.66	152.83	242.68	0.66369	0.00013687
4121	Dhx15	22.002/20.277/43.287	16.952/193.14/56.115	22.002	56.115	1.3121	0.00013709
52722	Wfdc5	50.953/61.846/63.605	63.348/148.79/118.96	61.846	118.96	0.93272	0.00013831
51697	Dicer1	100.17/88.206/135.16	104.39/270.4/172.83	100.17	172.83	0.78096	0.00013899
68327	Clspn	11.001/35.485/8.834	7.1378/78.687/35.165	11.001	35.165	1.5914	0.00013915
32128	Apopt1	139.54/133.83/136.04	157.03/238.92/220.72	136.04	220.72	0.6941	0.00013922
69197	Hist1h4c	166.18/119.64/147.53	152.57/450.66/235.68	147.53	235.68	0.67222	0.0001397
57466	Exosc2	15.633/23.319/39.753	14.276/64.38/58.36	23.319	58.36	1.2874	0.00014122
39431	Tepp	127.38/70.971/97.174	168.63/173.11/67.338	97.174	168.63	0.78897	0.00014223
57621	Ambra1	164.44/136.87/175.8	186.47/1030.1/257.38	164.44	257.38	0.64321	0.00014242
5360	Fanca	52.69/54.749/45.937	105.28/134.48/76.317	52.69	105.28	0.98518	0.00014316
28324	Ndufa7	84.535/78.068/96.291	94.575/193.14/151.14	84.535	151.14	0.83078	0.00014358
78303	Gm19402	61.954/55.763/66.255	53.533/281.84/118.96	61.954	118.96	0.93024	0.0001438
18169	Phlda2	53.848/65.901/34.453	44.611/154.51/106.99	53.848	106.99	0.97743	0.00014399
49452	Actr5	57.322/60.832/83.923	37.473/117.32/124.2	60.832	117.32	0.93621	0.00014411
66469	Olfr920	38.214/36.499/50.354	47.288/82.979/86.043	38.214	82.979	1.0986	0.0001444
21215	Tada1	98.431/71.984/136.04	112.42/170.25/178.07	98.431	170.25	0.78433	0.00014495
69141	C1s2	123.91/67.929/61.838	127.59/173.11/81.554	67.929	127.59	0.89957	0.00014508
6746	Gpaa1	73.534/106.46/143.11	83.869/376.27/181.06	106.46	181.06	0.76071	0.00014714
15328	Scn8a	79.903/64.887/29.152	123.13/226.05/28.432	64.887	123.13	0.91374	0.00014749
52493	Mterf1b	120.43/135.86/120.14	144.54/253.23/199.77	120.43	199.77	0.72538	0.00014765
49435	Rlf	105.38/105.44/102.47	132.05/271.83/179.57	105.38	179.57	0.76333	0.0001483
60572	Atp2c1	94.378/61.846/83.04	107.96/546.52/148.89	83.04	148.89	0.83478	0.00014847
56854	Opalin	79.903/98.345/73.322	52.641/144.5/147.4	79.903	144.5	0.84673	0.00014852
47501	Csnk1g2	58.48/66.915/55.654	56.21/158.8/113.73	58.48	113.73	0.94773	0.00014906
268	Adam4	118.12/80.095/80.39	133.83/240.35/145.15	80.39	145.15	0.84454	0.00014948
45893	Pcdhb7	79.324/79.081/93.641	143.65/257.52/42.648	79.324	143.65	0.84864	0.00014972
47493	Traf3ip2	126.8/99.359/101.59	115.99/263.24/174.33	101.59	174.33	0.77317	0.00015128
66194	Olfr43	185.86/109.5/151.95	240.9/513.61/114.47	151.95	240.9	0.66139	0.00015138
69110	Adam1b	59.059/25.347/70.672	47.288/356.24/114.47	59.059	114.47	0.94313	0.000153
18084	Trp53	271.55/206.83/186.4	242.68/520.77/310.5	206.83	310.5	0.58386	0.0001536
66052	Olfr826	80.482/77.054/92.757	85.653/227.48/145.15	80.482	145.15	0.84291	0.00015371
3149	Col10a1	123.91/104.43/91.874	122.23/517.9/178.07	104.43	178.07	0.76428	0.0001543
65885	Olfr120	97.273/129.77/95.407	108.85/640.94/168.35	97.273	168.35	0.7851	0.00015442
4062	Dcn	134.33/114.57/121.03	164.17/200.29/203.51	121.03	200.29	0.72212	0.00015464
74331	Sp140	63.112/45.624/44.17	46.395/482.14/94.273	45.624	94.273	1.031	0.00015557
70311	Vstm4	71.218/31.43/68.905	49.072/576.56/128.69	68.905	128.69	0.8916	0.00015559
58944	Alkbh2	81.061/63.873/90.107	77.623/244.65/145.9	81.061	145.9	0.84006	0.0001558
2800	Chat	63.112/69.957/73.322	81.192/133.05/130.19	69.957	130.19	0.88662	0.00015592
12515	Reg3b	100.75/80.095/69.789	144.54/383.42/133.18	80.095	144.54	0.84372	0.00015602
77449	Gm20852	184.7/171.34/176.68	228.41/326.19/272.35	176.68	272.35	0.62144	0.00015713
44566	Chsy3	92.641/70.971/71.556	93.683/426.34/132.43	71.556	132.43	0.87894	0.0001573
43257	Golga1	89.167/50.693/62.722	100.82/221.75/119.71	62.722	119.71	0.92172	0.00015746
34201	3300002I08Rik	75.271/97.331/67.139	72.27/248.94/137.67	75.271	137.67	0.86244	0.00015865
36905	Arhgap42	130.28/96.317/96.291	107.96/283.27/166.85	96.317	166.85	0.7864	0.0001603
69186	Hist1h3h	4.053/4.0555/7.9506	15.168/95.855/18.705	4.0555	18.705	1.9627	0.00016039
40467	Rnf138rt1	117.54/82.123/78.623	147.22/268.97/86.043	82.123	147.22	0.83438	0.00016147
48646	Dio3	202.65/141.94/126.33	227.52/231.77/190.04	141.94	227.52	0.67688	0.00016153
48141	Fam83h	79.903/118.62/89.224	157.03/175.97/85.295	89.224	157.03	0.80863	0.00016286
38496	Ccdc71	99.01/130.79/97.174	170.41/495.01/139.91	99.01	170.41	0.77734	0.00016365
51664	Creld1	112.33/118.62/122.79	91.899/396.3/196.78	118.62	196.78	0.72539	0.0001637
27067	Dpys	183.55/133.83/128.09	216.81/618.05/86.043	133.83	216.81	0.69192	0.00016464
20338	Psmb3	28.95/38.527/50.354	26.767/390.57/83.05	38.527	83.05	1.0884	0.00016472
65781	Olfr710	104.8/48.666/73.322	134.73/642.37/97.266	73.322	134.73	0.86882	0.00016528
43142	Bri3bp	68.902/72.998/70.672	90.114/158.8/130.94	70.672	130.94	0.88035	0.00016603
9719	Lcn3	103.06/82.123/111.31	159.71/243.21/175.83	103.06	175.83	0.76488	0.00016636
30830	Gpalpp1	76.429/85.165/78.623	72.27/370.54/142.16	78.623	142.16	0.84636	0.00016701
66291	Olfr497	91.483/74.012/60.071	135.62/157.37/74.072	74.012	135.62	0.86495	0.00016847
12575	Kat2b	65.428/98.345/95.407	59.779/474.98/165.35	95.407	165.35	0.78703	0.00016847
66511	Olfr1502	59.638/56.776/56.538	41.934/254.66/110.73	56.776	110.73	0.95151	0.00016848
58827	Polr2b	26.634/25.347/67.139	19.629/135.91/63.597	26.634	63.597	1.225	0.00016888
15533	Sema3a	97.273/86.179/79.506	119.56/167.39/152.63	86.179	152.63	0.81745	0.00016922
50639	Helb	139.54/105.44/114.84	122.23/483.57/191.54	114.84	191.54	0.73299	0.00016974
46765	Tiparp	143.59/137.89/138.69	131.16/360.53/222.96	138.69	222.96	0.681	0.0001702
1914	Ddr1	72.955/76.04/89.224	81.192/168.82/138.42	76.04	138.42	0.85573	0.00017094
17815	Tnfrsf17	105.38/67.929/71.556	132.05/183.13/94.273	71.556	132.05	0.87479	0.00017161
3101	Camp	110.01/55.763/59.188	114.2/164.53/46.389	59.188	114.2	0.93665	0.00017166
41734	Morn5	86.272/82.123/85.69	131.16/196/151.89	85.69	151.89	0.81851	0.00017173
6692	Gngt2	112.33/106.46/102.47	180.23/207.45/114.47	106.46	180.23	0.75407	0.000172
41276	Cylc2	45.742/46.638/75.089	95.468/0/133.18	46.638	95.468	1.0179	0.00017202
37071	Cdc5l	16.212/26.36/18.551	8.9222/267.54/49.381	18.551	49.381	1.3656	0.00017213
10750	Mmp10	40.53/46.638/37.986	36.581/90.132/86.043	40.53	86.043	1.0676	0.0001725
71376	Gm5128	112.91/126.73/110.43	214.13/188.85/106.99	112.91	188.85	0.737	0.00017301
31295	1700011L22Rik	95.536/95.303/138.69	105.28/301.87/165.35	95.536	165.35	0.7851	0.00017438
4832	Eif4g2	66.586/83.137/73.322	53.533/134.48/142.16	73.322	134.48	0.86625	0.00017449
7941	Hr	53.848/75.026/52.121	78.515/522.2/106.24	53.848	106.24	0.9674	0.00017523
43031	Cpb1	72.376/84.151/96.291	61.563/307.59/149.64	84.151	149.64	0.82302	0.00017565
10505	Mcpt8	185.28/140.93/155.48	244.47/619.48/184.81	155.48	244.47	0.64957	0.00017643
51229	Vgll1	151.7/116.59/113.96	193.61/349.08/101.76	116.59	193.61	0.72678	0.00017784
75350	Gsk3a	73.534/92.262/68.905	110.64/683.86/134.68	73.534	134.68	0.8642	0.00017868
9664	Lamp2	171.97/152.08/138.69	240.01/602.31/172.83	152.08	240.01	0.65479	0.00017873
33120	Pmvk	23.16/41.568/42.403	16.952/390.57/87.54	41.568	87.54	1.0565	0.00017877
65899	Olfr1504	107.7/81.109/87.457	93.683/402.02/154.13	87.457	154.13	0.81043	0.00017895
70263	Fam19a4	143.59/83.137/85.69	151.68/250.37/114.47	85.69	151.68	0.81655	0.00017926
41253	Tmem65	104.8/70.971/85.69	151.68/253.23/144.4	85.69	151.68	0.81655	0.00017926
14914	Rpl30	4.6321/10.139/18.551	5.3533/78.687/32.921	10.139	32.921	1.6066	0.00018041
23723	St3gal6	148.8/105.44/159.01	129.37/327.62/235.68	148.8	235.68	0.65988	0.00018147
3589	Csf2ra	118.7/113.55/163.43	196.29/0/219.22	118.7	196.29	0.72093	0.00018151
44235	Mrpl9	81.061/77.054/124.56	54.425/213.17/145.15	81.061	145.15	0.83269	0.00018272
65292	Olfr1215	113.49/133.83/89.224	99.929/237.49/189.3	113.49	189.3	0.73308	0.00018347
37184	Tmprss6	149.96/105.44/104.24	178.44/237.49/142.16	105.44	178.44	0.75347	0.00018592
49944	Chaf1b	24.897/17.236/24.735	33.012/60.088/65.842	24.735	60.088	1.2471	0.00018748
40466	Rnf138rt1	109.43/80.095/83.923	149/492.15/80.806	83.923	149	0.82074	0.0001879
24145	Ramp3	79.903/80.095/99.824	87.438/447.8/143.65	80.095	143.65	0.83492	0.00018857
33097	Rtn4	161.54/137.89/121.91	221.27/329.05/176.58	137.89	221.27	0.67842	0.00018885
63282	Klhl31	101.33/80.095/79.506	143.65/464.97/71.827	80.095	143.65	0.83485	0.00018886
41523	Fgfr1op	66.007/110.51/86.573	92.791/360.53/152.63	86.573	152.63	0.81092	0.00018934
65709	Olfr1032	119.85/107.47/166.96	113.31/287.57/197.53	119.85	197.53	0.71605	0.0001912
59615	Arhgap33	65.428/66.915/116.61	65.132/364.82/124.95	66.915	124.95	0.89104	0.00019124
15621	Sfrp1	94.378/67.929/117.49	163.28/447.8/55.367	94.378	163.28	0.78439	0.00019214
1942	Calm1	78.745/65.901/55.654	49.072/248.94/123.45	65.901	123.45	0.8955	0.00019309
16313	Sod1	70.639/47.652/59.188	53.533/314.75/113.73	59.188	113.73	0.93065	0.00019326
67190	Olfr201	46.9/64.887/100.71	41.934/323.33/121.96	64.887	121.96	0.90008	0.00019484
77750	Eif3j2	49.216/46.638/45.054	72.27/140.21/95.022	46.638	95.022	1.0113	0.00019485
53286	Plac9a	93.22/80.095/116.61	100.82/387.71/161.61	93.22	161.61	0.78732	0.0001953
76038	Phf11c	92.641/69.957/78.623	85.653/390.57/141.41	78.623	141.41	0.8388	0.00019621
36913	Izumo4	118.7/94.289/118.38	195.4/387.71/82.302	118.38	195.4	0.71826	0.00019696
59586	Zfp940	99.01/86.179/71.556	82.084/296.15/151.89	86.179	151.89	0.8104	0.00019736
72288	Atp2b4	92.062/66.915/73.322	114.2/324.76/133.93	73.322	133.93	0.86032	0.00019744
21158	Naglu	94.957/141.94/95.407	94.575/164.53/199.77	95.407	164.53	0.77985	0.00019795
597	Alas2	127.96/116.59/140.46	180.23/291.86/208	127.96	208	0.69657	0.00019822
6493	Gclc	45.163/48.666/57.421	32.12/442.08/98.014	48.666	98.014	0.9954	0.00019888
17716	Tle3	155.17/138.9/129.86	119.56/537.93/222.22	138.9	222.22	0.67405	0.0002006
6843	Grk5	92.641/100.37/97.174	166.85/254.66/110.73	97.174	166.85	0.77371	0.00020125
23164	Ppm1d	75.271/76.04/108.66	82.084/565.12/137.67	76.04	137.67	0.84797	0.00020131
59812	Olfr6	86.272/33.458/54.771	107.07/111.59/34.417	54.771	107.07	0.95433	0.00020181
8429	Igtp	108.27/68.943/47.704	127.59/211.74/21.698	68.943	127.59	0.8785	0.00020307
41092	Tdrd9	49.795/57.79/72.439	62.455/243.21/111.48	57.79	111.48	0.93605	0.00020311
44651	Bhlhe41	78.745/77.054/90.99	111.53/337.64/141.41	78.745	141.41	0.83659	0.00020351
44515	Cnot10	43.426/56.776/72.439	76.731/652.39/109.99	56.776	109.99	0.94182	0.0002036
18176	Tssk2	96.115/104.43/119.26	131.16/537.93/176.58	104.43	176.58	0.75218	0.00020415
57504	Mapkap1	129.12/82.123/121.91	199.86/234.63/88.288	121.91	199.86	0.70857	0.00020432
38656	Cul4b	169.07/86.179/129.86	217.7/210.31/116.72	129.86	210.31	0.69133	0.00020435
42863	Ccdc6	26.055/47.652/28.269	27.659/65.811/68.835	28.269	65.811	1.1907	0.00020462
21814	Aass	75.271/74.012/89.224	136.51/238.92/83.05	75.271	136.51	0.85033	0.00020478
26371	Anapc5	24.318/43.596/30.036	68.701/95.855/20.95	30.036	68.701	1.1673	0.00020674
14263	Rab17	58.48/80.095/69.789	49.964/231.77/128.69	69.789	128.69	0.87348	0.0002078
20229	Mapk10	84.535/85.165/107.78	85.653/150.22/169.84	85.165	150.22	0.81149	0.0002083
10828	Me1	137.22/118.62/88.34	195.4/583.71/98.763	118.62	195.4	0.71528	0.00020847
58214	Prdm13	105.38/51.707/75.973	137.4/153.08/67.338	75.973	137.4	0.84645	0.00020901
15425	Ccl8	54.427/35.485/49.471	99.036/201.72/69.583	49.471	99.036	0.98701	0.00020929
38182	Mms19	46.9/63.873/129.86	81.192/120.18/125.7	63.873	120.18	0.90141	0.00021015
54637	Slc17a8	147.07/113.55/113.96	189.15/429.2/109.24	113.96	189.15	0.72603	0.00021063
65730	Olfr1023	103.06/106.46/105.12	81.192/407.74/177.32	105.12	177.32	0.74874	0.00021139
11245	Myl2	138.38/104.43/111.31	133.83/412.03/185.55	111.31	185.55	0.73212	0.00021317
23549	Gabbr1	163.86/80.095/98.058	167.74/175.97/77.065	98.058	167.74	0.76844	0.00021342
68617	Pfkfb4	92.641/82.123/82.156	149.89/145.93/51.626	82.156	145.93	0.82122	0.00021378
923	Apoa4	81.061/62.86/87.457	73.162/157.37/144.4	81.061	144.4	0.82529	0.00021395
49125	Oxsr1	40.53/96.317/63.605	58.887/559.39/119.71	63.605	119.71	0.90186	0.00021403
15451	Sdf2	145.91/94.289/122.79	200.75/689.58/114.47	122.79	200.75	0.70464	0.00021407
76424	Smco3	100.75/83.137/110.43	112.42/402.02/171.34	100.75	171.34	0.76025	0.00021495
39773	Prr27	98.431/101.39/121.91	172.2/247.51/123.45	101.39	172.2	0.7584	0.00021505
58497	Thrap3	124.49/54.749/89.224	148.11/506.46/155.63	89.224	155.63	0.79575	0.0002162
4751	Egfr	37.056/40.555/51.237	68.701/346.22/85.295	40.555	85.295	1.0543	0.0002181
2329	Cct4	15.054/19.263/37.986	23.198/68.672/50.13	19.263	50.13	1.3353	0.00021812
57179	Plekhb2	75.271/63.873/68.905	61.563/525.06/127.19	68.905	127.19	0.87486	0.00021942
69849	Relt	158.07/136.87/143.99	82.977/291.86/228.2	143.99	228.2	0.66062	0.00022132
58996	B3gnt4	84.535/45.624/50.354	107.07/100.15/75.568	50.354	100.15	0.97791	0.00022151
56619	Pggt1b	60.796/68.943/94.524	54.425/565.12/127.19	68.943	127.19	0.87409	0.00022208
5244	Wfdc18	127.38/99.359/143.99	188.26/359.1/206.5	127.38	206.5	0.6927	0.00022424
797	Ap1m1	55.585/91.248/83.923	77.623/221.75/148.14	83.923	148.14	0.81247	0.00022431
391	Adra1d	59.638/69.957/68.022	125.8/181.7/79.309	68.022	125.8	0.87746	0.00022618
19397	Agr2	105.96/51.707/124.56	57.102/502.17/178.07	105.96	178.07	0.74349	0.00022625
22471	Cdca8	12.159/38.527/34.453	0.89222/201.72/75.568	34.453	75.568	1.1109	0.000227
8615	Il9	88.588/70.971/72.439	132.05/336.21/41.899	72.439	132.05	0.85734	0.00022708
20075	Ceacam2	92.641/110.51/106.01	105.28/224.62/178.07	106.01	178.07	0.74282	0.00022904
26756	Trpv4	64.849/81.109/62.722	74.054/178.83/121.21	64.849	121.21	0.89212	0.00022923
73906	Trim80	61.954/66.915/65.372	81.192/243.21/121.96	65.372	121.96	0.88951	0.00022932
28994	Nkapl	67.744/65.901/51.237	91.007/738.23/122.71	65.901	122.71	0.8868	0.00022985
59432	Galp	107.7/117.61/105.12	97.252/180.26/202.01	107.7	180.26	0.73781	0.00023177
44810	BC004004	118.7/129.77/120.14	107.96/253.23/196.78	120.14	196.78	0.70717	0.00023233
52349	Chmp6	20.265/40.555/39.753	24.09/163.1/83.799	39.753	83.799	1.0571	0.00023505
5545	Fgf3	53.269/65.901/55.654	48.18/150.22/107.74	55.654	107.74	0.94064	0.00023659
59220	Hdac11	100.75/82.123/94.524	95.468/296.15/162.36	94.524	162.36	0.77412	0.00023864
45582	Il24	97.852/94.289/151.95	166.85/400.59/89.784	97.852	166.85	0.76379	0.00023985
43694	H2afv	226.39/135.86/146.64	231.09/313.32/96.518	146.64	231.09	0.65252	0.0002406
46488	Pid1	98.431/113.55/95.407	84.761/433.49/167.6	98.431	167.6	0.76181	0.00024125
44995	Syt13	72.376/66.915/92.757	108.85/198.86/131.68	72.376	131.68	0.85461	0.00024134
16723	Stac	114.64/97.331/97.174	124.02/506.46/166.1	97.331	166.1	0.765	0.00024164
47336	Cog4	31.845/49.679/63.605	49.072/216.03/98.763	49.679	98.763	0.9771	0.00024481
75534	Tmem170b	110.01/89.22/100.71	112.42/778.29/170.59	100.71	170.59	0.75453	0.00024484
4686	Eef1a1	56.164/56.776/113.08	76.731/276.12/109.24	56.776	109.24	0.93206	0.00024546
73034	Tldc2	68.902/81.109/68.905	126.7/138.78/62.101	68.905	126.7	0.86923	0.00024565
23629	Il1f6	41.109/53.735/47.704	63.348/198.86/95.77	47.704	95.77	0.99053	0.00024691
4997	Epha3	132.59/116.59/98.941	104.39/191.71/199.77	116.59	191.71	0.71261	0.00024811
4127	Ddx3x	0.57901/14.194/7.9506	0/47.212/27.683	7.9506	27.683	1.6802	0.00024913
37460	Fam217a	63.691/37.513/43.287	93.683/0/89.036	43.287	89.036	1.0236	0.00024961
71966	Scarf1	101.33/83.137/121.03	171.31/201.72/101.76	101.33	171.31	0.7518	0.00025019
9043	Kcne1	97.273/50.693/62.722	117.77/160.24/99.511	62.722	117.77	0.89835	0.00025059
44352	Csgalnact2	90.325/90.234/93.641	140.97/248.94/156.37	90.325	156.37	0.78512	0.00025132
58771	Tada2b	97.852/141.94/114.84	114.2/230.34/189.3	114.84	189.3	0.71608	0.00025232
18493	Unc13b	125.64/104.43/136.93	120.45/808.33/203.51	125.64	203.51	0.69139	0.00025271
48704	Mrpl30	88.009/95.303/114.84	72.27/237.49/163.11	95.303	163.11	0.76899	0.00025325
77354	Gm20826	101.33/71.984/75.973	136.51/147.36/46.389	75.973	136.51	0.83712	0.00025335
71186	Ceacam16	126.8/150.05/122.79	120.45/619.48/205.01	126.8	205.01	0.68878	0.00025353
13332	Pms2	114.64/116.59/125.44	167.74/233.2/191.54	116.59	191.54	0.71134	0.00025554
55310	Gm527	74.692/71.984/94.524	104.39/319.04/134.68	74.692	134.68	0.84196	0.00025556
69592	Agmo	82.219/78.068/86.573	91.007/735.37/145.15	82.219	145.15	0.81248	0.00025568
37805	Synpr	147.65/124.71/151.95	231.98/804.04/106.24	147.65	231.98	0.6483	0.00025578
4442	Drd4	121.01/88.206/87.457	93.683/233.2/153.38	88.206	153.38	0.79128	0.00025609
51515	Vmn1r215	82.798/91.248/86.573	71.378/244.65/151.14	86.573	151.14	0.7968	0.00025639
40485	Mageb5	134.33/96.317/166.08	133.83/267.54/214.73	134.33	214.73	0.67278	0.00025715
36652	Lrrfip2	125.64/115.58/118.38	121.34/297.58/193.78	118.38	193.78	0.70637	0.00026028
64685	Olfr1324	110.59/87.192/82.156	132.94/257.52/151.89	87.192	151.89	0.79372	0.00026162
71344	Thoc2	12.159/28.388/21.202	11.599/223.19/53.122	21.202	53.122	1.2856	0.00026229
30408	Ccdc53	71.218/91.248/121.91	84.761/157.37/180.32	91.248	157.37	0.77975	0.00026438
33432	Flnc	123.33/86.179/76.856	93.683/261.81/150.39	86.179	150.39	0.79621	0.0002672
56409	Abcc10	106.54/92.262/97.174	91.007/299.01/165.35	97.174	165.35	0.76083	0.00026746
73674	Ifna14	64.27/50.693/47.704	99.929/336.21/56.115	50.693	99.929	0.96529	0.00026805
2373	Ms4a1	90.325/67.929/60.955	124.91/201.72/79.309	67.929	124.91	0.86922	0.00026875
29844	Rpp14	20.265/32.444/37.103	19.629/92.994/71.827	32.444	71.827	1.1227	0.00026899
25809	Fbxo3	204.39/146/149.3	233.76/473.55/154.13	149.3	233.76	0.6434	0.00026911
47147	Prkd2	85.693/89.22/98.941	96.36/154.51/170.59	89.22	154.51	0.78551	0.00026936
4789	Eif2s1	26.055/23.319/51.237	31.228/91.563/61.353	26.055	61.353	1.2045	0.00026951
6982	Cxcl1	171.39/165.26/180.21	182.01/346.22/261.87	171.39	261.87	0.60871	0.00026972
43529	Ptgr2	150.54/144.98/143.11	108.85/464.97/228.2	144.98	228.2	0.65082	0.0002699
27479	2019-03-01	69.481/56.776/53.888	108.85/177.4/78.561	56.776	108.85	0.92699	0.00027011
17908	Tnp1	38.793/53.735/45.937	27.659/692.45/92.777	45.937	92.777	0.99851	0.00027021
67388	Olfr652	88.588/98.345/105.12	166.85/470.69/130.19	98.345	166.85	0.75661	0.00027188
39078	3110007F17Rik	55.006/81.109/65.372	65.132/271.83/121.21	65.372	121.21	0.88071	0.00027262
54675	Tspan8	123.33/77.054/94.524	123.13/161.67/173.58	94.524	161.67	0.76798	0.00027264
33248	Slc44a2	83.956/87.192/79.506	147.22/247.51/103.25	83.956	147.22	0.80292	0.00027358
3570	Cryz	86.272/82.123/101.59	77.623/155.94/150.39	86.272	150.39	0.79467	0.00027416
29228	Tmem170	89.746/80.095/71.556	141.86/183.13/115.97	80.095	141.86	0.81694	0.00027478
4821	Eif4ebp1	118.7/86.179/86.573	150.79/970/124.2	86.573	150.79	0.79347	0.00027507
49132	Galnt16	75.85/64.887/63.605	66.024/200.29/120.46	64.887	120.46	0.88241	0.00027619
12463	Bloc1s6	107.12/89.22/83.923	154.35/170.25/88.288	89.22	154.35	0.78404	0.00027789
20114	Esrra	100.75/104.43/129.86	174.88/191.71/153.38	104.43	174.88	0.73829	0.00027889
41844	Ccdc101	58.48/63.873/91.874	106.17/144.5/118.96	63.873	118.96	0.8869	0.0002792
8732	Irf4	56.164/63.873/64.488	38.365/483.57/118.96	63.873	118.96	0.8869	0.0002792
59360	Amn1	97.852/75.026/41.52	134.73/233.2/80.058	75.026	134.73	0.83613	0.00027964
22902	Mtx2	53.848/51.707/84.807	104.39/273.26/100.26	53.848	104.39	0.94223	0.00028209
23559	Ppt2	34.74/46.638/45.054	41.042/244.65/91.281	45.054	91.281	1.0027	0.00028249
75914	Vmn2r93	92.062/75.026/68.905	96.36/556.53/134.68	75.026	134.68	0.8356	0.00028259
64256	Olfr1359	123.91/78.068/99.824	168.63/203.16/119.71	99.824	168.63	0.75054	0.00028262
23007	Zpbp	141.86/153.09/149.3	169.52/330.49/233.44	149.3	233.44	0.64142	0.00028264
16871	Stx3	93.799/54.749/61.838	119.56/60.088/115.97	61.838	115.97	0.89644	0.00028403
5024	Ephb3	101.91/45.624/61.838	87.438/798.32/115.97	61.838	115.97	0.89644	0.00028403
25219	Clcf1	74.113/48.666/55.654	50.857/293.29/106.99	55.654	106.99	0.93068	0.00028522
69953	Senp5	79.903/81.109/68.022	69.593/144.5/141.41	79.903	141.41	0.81579	0.00028561
70182	Svopl	140.12/207.84/158.13	146.32/244.65/261.12	158.13	244.65	0.62638	0.00028606
16365	Sox15	150.54/176.41/150.18	139.19/360.53/234.94	150.54	234.94	0.63868	0.00028698
73074	Vmn2r11	72.955/48.666/84.807	69.593/403.45/131.68	72.955	131.68	0.84327	0.00028832
37849	Slc39a4	72.955/107.47/59.188	66.024/160.24/131.68	72.955	131.68	0.84327	0.00028832
57871	Taf4a	60.217/58.804/43.287	111.53/207.45/47.137	58.804	111.53	0.91196	0.00028853
74183	Grxcr1	130.28/168.3/128.09	105.28/349.08/208.75	130.28	208.75	0.67605	0.00028868
54383	Sec22c	111.17/94.289/98.058	113.31/354.81/166.1	98.058	166.1	0.75438	0.00029068
19630	Aadat	43.426/19.263/58.305	42.827/88.702/89.784	43.426	88.702	1.0137	0.00029122
20805	Trappc3	41.109/58.804/60.071	56.21/310.46/111.48	58.804	111.48	0.91138	0.00029172
43646	Tcaf1	102.48/72.998/82.156	119.56/608.04/144.4	82.156	144.4	0.80616	0.00029281
71578	Nell1	133.75/87.192/87.457	151.68/444.94/83.799	87.457	151.68	0.78744	0.00029295
5656	Fkbp1a	56.743/57.79/82.156	77.623/230.34/109.99	57.79	109.99	0.91672	0.0002936
17982	Tpm2	52.69/57.79/49.471	69.593/155.94/102.5	52.69	102.5	0.94697	0.00029548
50347	Ly6g5c	71.218/81.109/106.89	67.809/218.89/142.91	81.109	142.91	0.80952	0.0002959
67161	Olfr38	174.28/161.2/212.9	201.64/363.39/264.86	174.28	264.86	0.60102	0.00029604
57388	Sohlh1	111.75/68.943/73.322	132.05/183.13/53.122	73.322	132.05	0.84008	0.00029782
27862	Osgep	49.795/53.735/79.506	83.869/148.79/104	53.735	104	0.93986	0.0002985
18857	Wisp2	104.22/84.151/98.058	165.95/560.82/89.784	98.058	165.95	0.7531	0.00029882
41458	Rnf121	63.691/50.693/40.637	105.28/0/99.511	50.693	99.511	0.9593	0.00029885
38443	Pinx1	48.637/65.901/60.955	55.318/377.7/114.47	60.955	114.47	0.89829	0.00029958
568	Akap3	93.22/60.832/68.905	125.8/270.4/85.295	68.905	125.8	0.85911	0.00029996
30066	Kbtbd4	108.85/103.41/117.49	100.82/656.68/180.32	108.85	180.32	0.72293	0.00030264
43312	Rbm17	46.321/42.582/37.103	37.473/87.271/90.532	42.582	87.271	1.0182	0.0003035
33886	Zc3h15	126.22/138.9/106.01	210.56/203.16/104.75	126.22	203.16	0.6823	0.00030374
52814	Rgag1	69.481/41.568/63.605	66.024/194.57/118.22	63.605	118.22	0.88386	0.00030378
4350	Dnm2	29.529/80.095/74.206	49.072/393.44/133.18	74.206	133.18	0.83525	0.00030458
32635	Toporsl	143.01/126.73/135.16	136.51/615.19/214.73	135.16	214.73	0.66394	0.00030547
20501	Chst4	63.112/68.943/58.305	80.3/123.04/117.47	63.112	117.47	0.88583	0.00030682
22864	Ube2k	80.482/71.984/88.34	141.86/354.81/131.68	80.482	141.86	0.81008	0.00030687
26490	Stard3	97.852/124.71/109.54	107.96/226.05/181.06	109.54	181.06	0.71986	0.00031162
9247	Kif5b	96.115/74.012/96.291	112.42/264.67/163.11	96.115	163.11	0.75688	0.00031182
69152	Zar1	49.795/44.61/68.905	74.947/284.7/98.014	49.795	98.014	0.96296	0.00031187
26395	Rrs1	12.738/12.166/21.202	11.599/37.198/42.648	12.738	37.198	1.4753	0.00031217
12695	Pde1b	120.43/98.345/90.107	93.683/287.57/166.1	98.345	166.1	0.7502	0.00031238
67264	Olfr1048	63.691/57.79/70.672	85.653/221.75/118.22	63.691	118.22	0.88195	0.0003125
22263	Rgs14	116.38/95.303/104.24	173.98/253.23/79.309	104.24	173.98	0.73351	0.00031329
19532	Farsb	4.6321/15.208/27.385	9.8144/65.811/41.899	15.208	41.899	1.4043	0.00031352
38166	Scaf11	130.86/87.192/90.99	156.14/228.91/123.45	90.99	156.14	0.77248	0.00031389
41043	S100pbp	169.07/155.12/148.41	154.35/364.82/240.17	155.12	240.17	0.6274	0.00031442
71672	Agap1	85.114/127.75/78.623	148.11/75.826/165.35	85.114	148.11	0.79204	0.00031482
53848	Slc44a3	85.693/75.026/107.78	91.007/323.33/148.89	85.693	148.89	0.78994	0.0003154
39137	Abracl	116.96/99.359/131.63	131.16/256.09/190.79	116.96	190.79	0.70125	0.0003155
56876	Fam178a	45.742/27.374/46.82	91.899/223.19/50.13	45.742	91.899	0.99095	0.00031693
37146	Vps11	59.059/85.165/94.524	79.408/184.56/148.14	85.165	148.14	0.79154	0.00031696
7089	Gtf2h1	33.003/37.513/62.722	41.934/231.77/79.309	37.513	79.309	1.0602	0.00031749
34413	1700025F22Rik	178.91/158.16/161.66	230.19/251.8/248.4	161.66	248.4	0.6166	0.00031835
67360	Olfr1351	132.01/110.51/113.08	185.58/241.78/115.97	113.08	185.58	0.70982	0.00032042
1556	Glb1	70.639/91.248/121.03	59.779/240.35/156.37	91.248	156.37	0.77061	0.00032085
69551	Zfp944	67.744/22.305/30.919	63.348/103.01/68.835	30.919	68.835	1.1295	0.00032118
18492	Unc13b	128.54/130.79/147.53	143.65/512.18/208.75	130.79	208.75	0.67043	0.0003214
14334	Rabggtb	28.371/57.79/42.403	33.012/542.23/86.791	42.403	86.791	1.0163	0.00032176
77543	Cyp3a59	176.6/143.97/128.98	225.73/897.03/181.81	143.97	225.73	0.64524	0.00032292
3282	Cox4i1	58.48/71.984/65.372	52.641/224.62/120.46	65.372	120.46	0.87185	0.00032344
25010	Mpp6	55.006/32.444/35.336	75.839/268.97/30.676	35.336	75.839	1.0804	0.00032384
12256	Olfr61	100.17/56.776/107.78	106.17/419.19/168.35	100.17	168.35	0.74321	0.0003243
26153	Stk4	42.847/23.319/53.888	87.438/300.44/86.791	42.847	87.438	1.0122	0.00032432
23532	Hils1	78.166/34.471/69.789	126.7/224.62/105.5	69.789	126.7	0.85111	0.00032435
58547	Ahdc1	135.49/111.53/122.79	146.32/615.19/198.27	122.79	198.27	0.68682	0.00032454
69952	Senp5	87.43/130.79/87.457	83.869/187.42/151.14	87.457	151.14	0.78232	0.00032588
58308	6330416G13Rik	134.33/147.01/126.33	213.24/572.27/76.317	134.33	213.24	0.66276	0.00032638
56616	Pggt1b	46.9/33.458/63.605	29.443/163.1/93.525	46.9	93.525	0.98069	0.00032659
49222	Rcc2	146.49/104.43/101.59	173.98/911.34/114.47	104.43	173.98	0.73096	0.00032763
15639	Srsf5	64.27/36.499/37.103	79.408/0/78.561	37.103	78.561	1.0622	0.00032812
40689	Specc1l	45.163/59.818/51.237	99.929/0/104.75	51.237	99.929	0.95018	0.00033015
57711	Sel1l2	118.12/89.22/72.439	153.46/197.43/73.324	89.22	153.46	0.77573	0.00033078
41375	4930505A04Rik	135.49/137.89/157.25	143.65/258.95/217.73	137.89	217.73	0.65523	0.00033191
60065	Csgalnact1	74.692/51.707/53.004	74.054/389.14/102.5	53.004	102.5	0.93854	0.00033216
42629	Tbx18	40.53/30.416/58.305	22.306/127.33/83.799	40.53	83.799	1.0299	0.00033397
39130	Prss57	55.585/69.957/54.771	99.929/108.73/106.24	55.585	106.24	0.92242	0.00033461
61351	Cdc20b	66.007/98.345/52.121	100.82/264.67/121.21	66.007	121.21	0.86697	0.00033486
17274	Vps72	46.9/62.86/82.156	48.18/117.32/116.72	62.86	116.72	0.88238	0.00033563
75286	Btnl2	80.482/75.026/93.641	94.575/685.29/141.41	80.482	141.41	0.8055	0.00033669
22065	Acsl4	61.375/62.86/61.838	82.977/241.78/115.22	61.838	115.22	0.88718	0.00033843
18170	Tssk1	52.69/30.416/47.704	94.575/248.94/44.892	47.704	94.575	0.97261	0.00034002
51890	Abcg4	82.798/74.012/90.107	144.54/204.59/73.324	82.798	144.54	0.79643	0.00034056
32754	Sirt5	82.798/75.026/82.156	107.96/293.29/143.65	82.156	143.65	0.79871	0.00034082
47852	Smek2	106.54/105.44/88.34	66.917/191.71/175.08	105.44	175.08	0.72616	0.00034284
13884	Psmc3	46.9/57.79/55.654	33.012/117.32/106.24	55.654	106.24	0.92065	0.00034305
38016	Zbed3	151.12/98.345/108.66	179.34/608.04/88.288	108.66	179.34	0.71767	0.00034367
36288	Ttll7	104.22/95.303/63.605	161.49/227.48/47.885	95.303	161.49	0.75471	0.00034388
35481	Kif18b	6.3691/27.374/28.269	0.89222/214.6/62.849	27.374	62.849	1.1701	0.00034524
10211	Smad4	54.427/98.345/90.99	44.611/217.46/155.63	90.99	155.63	0.76777	0.0003464
51066	Kcnh7	99.589/113.55/107.78	106.17/728.21/178.07	107.78	178.07	0.71919	0.00034934
62638	Kctd8	182.97/155.12/152.83	195.4/413.46/239.42	155.12	239.42	0.62292	0.00035101
54331	Slc36a3	38.214/37.513/46.82	29.443/87.271/80.058	38.214	80.058	1.0476	0.00035134
23793	Ccdc120	76.429/87.192/119.26	34.797/473.55/150.39	87.192	150.39	0.77953	0.00035159
58679	Tnfrsf14	122.75/109.5/87.457	90.114/370.54/180.32	109.5	180.32	0.7145	0.00035161
1021	Arf1	71.797/93.276/106.89	97.252/178.83/158.62	93.276	158.62	0.75968	0.00035294
66571	Olfr665	103.64/85.165/95.407	161.49/1022.9/82.302	95.407	161.49	0.75315	0.00035303
61881	Lipk	83.377/69.957/106.89	92.791/268.97/145.15	83.377	145.15	0.79254	0.00035327
17550	Tgif1	188.76/158.16/165.2	202.53/829.79/252.14	165.2	252.14	0.60707	0.00035352
69756	Taf2	12.738/24.333/15.901	8.9222/42.92/96.518	15.901	42.92	1.3778	0.00035474
7697	Nr4a1	89.746/75.026/88.34	107.96/203.16/151.89	88.34	151.89	0.77506	0.00035613
58321	Acer2	102.48/86.179/88.34	129.37/256.09/151.89	88.34	151.89	0.77506	0.00035613
58994	Rad9b	143.59/111.53/98.058	182.91/237.49/123.45	111.53	182.91	0.70872	0.00035724
13413	Pon1	69.481/76.04/61.838	125.8/0/136.17	69.481	125.8	0.84729	0.0003587
23203	Rfx5	118.12/100.37/120.14	101.71/211.74/191.54	118.12	191.54	0.69277	0.00035947
73766	BC048507	49.216/53.735/64.488	59.779/123.04/103.25	53.735	103.25	0.92954	0.00035996
72119	Kmt2d	48.637/49.679/58.305	45.503/97.286/102.5	49.679	97.286	0.95558	0.0003605
58439	Ipo13	28.371/47.652/48.587	25.874/161.67/94.273	47.652	94.273	0.96959	0.0003608
28683	Exosc1	41.689/47.652/79.506	23.198/429.2/94.273	47.652	94.273	0.96959	0.0003608
45988	Bcl2l13	66.586/62.86/66.255	74.947/155.94/121.21	66.255	121.21	0.86163	0.0003624
60199	Fhod1	206.71/217.98/174.03	242.68/530.78/303.77	206.71	303.77	0.55318	0.0003624
11788	Notch2	115.8/90.234/66.255	154.35/168.82/83.05	90.234	154.35	0.76792	0.00036317
78609	Gm21951	28.371/49.679/34.453	30.336/387.71/74.072	34.453	74.072	1.0824	0.00036392
52218	Dtx4	35.319/45.624/39.753	57.102/286.13/82.302	39.753	82.302	1.0314	0.00036454
40451	Gpn1	24.318/22.305/65.372	10.707/64.38/57.612	24.318	57.612	1.211	0.00036482
12331	Orc1	13.896/24.333/27.385	9.8144/185.99/57.612	24.333	57.612	1.2102	0.00036811
36868	Sfpq	17.949/24.333/37.103	1.7844/64.38/57.612	24.333	57.612	1.2102	0.00036811
58185	Gbp7	99.01/129.77/95.407	86.545/248.94/166.1	99.01	166.1	0.74057	0.00036821
68366	Lhfpl3	193.97/150.05/171.38	259.64/270.4/216.23	171.38	259.64	0.59644	0.00036881
9803	Eif2d	119.85/162.22/141.34	111.53/406.31/221.47	141.34	221.47	0.64421	0.00037032
187	Actl7b	136.65/88.206/88.34	185.58/151.65/149.64	88.34	151.65	0.77286	0.00037262
61910	Vwa2	119.28/95.303/96.291	162.38/231.77/67.338	96.291	162.38	0.74789	0.00037299
13807	Prtn3	99.01/86.179/96.291	162.38/171.68/97.266	96.291	162.38	0.74789	0.00037299
37834	Slc35f2	118.12/154.11/150.18	125.8/290.43/232.69	150.18	232.69	0.62835	0.00037457
6697	Gnpat	92.062/74.012/78.623	138.29/320.47/97.266	78.623	138.29	0.80688	0.00037694
47084	Brk1	92.641/89.22/91.874	133.83/210.31/156.37	91.874	156.37	0.76085	0.00037721
54102	Pstk	88.009/70.971/104.24	102.61/280.41/151.14	88.009	151.14	0.77335	0.00037731
14806	Rnps1	30.687/35.485/46.82	44.611/181.7/75.568	35.485	75.568	1.0694	0.00037805
29246	Taz	33.582/35.485/61.838	51.749/237.49/75.568	35.485	75.568	1.0694	0.00037805
20149	Mapkbp1	100.17/50.693/53.888	68.701/256.09/103.25	53.888	103.25	0.92552	0.00038042
59235	Tmf1	86.272/49.679/80.39	103.5/243.21/140.66	80.39	140.66	0.79954	0.00038199
47893	4930427A07Rik	67.165/65.901/89.224	122.23/163.1/95.022	67.165	122.23	0.8543	0.00038391
78431	Rpl5	15.054/29.402/52.121	3.5689/134.48/65.842	29.402	65.842	1.1366	0.00038469
64744	Olfr498	45.742/48.666/46.82	41.934/175.97/92.777	46.82	92.777	0.97161	0.00038627
10647	Mgat1	98.431/83.137/108.66	165.06/1247.5/92.777	98.431	165.06	0.73994	0.00038648
72682	Alg8	92.641/110.51/93.641	114.2/1273.3/158.62	93.641	158.62	0.7541	0.0003872
42096	Idnk	160.96/122.68/122.79	197.18/505.03/181.06	122.79	197.18	0.67889	0.00038851
51904	Rapgef6	77.008/110.51/113.96	82.084/612.33/181.06	110.51	181.06	0.70726	0.00038958
45964	Nkd1	128.54/67.929/86.573	149/586.58/38.907	86.573	149	0.77641	0.00039104
68308	Fbxl4	151.7/137.89/140.46	181.12/489.29/219.97	140.46	219.97	0.64346	0.00039144
33307	Arl8a	80.482/58.804/81.273	63.348/532.21/140.66	80.482	140.66	0.7979	0.00039192
25301	Pf4	108.27/89.22/64.488	152.57/197.43/65.094	89.22	152.57	0.76737	0.00039291
22538	Tet1	111.17/120.65/113.96	124.02/193.14/185.55	113.96	185.55	0.69848	0.00039294
47514	Zc3h10	61.375/94.289/98.941	88.33/187.42/159.37	94.289	159.37	0.75099	0.00039635
4636	Eda	147.07/158.16/164.31	140.08/287.57/242.42	158.16	242.42	0.61293	0.00039812
11650	Nin	86.272/66.915/72.439	85.653/206.02/129.44	72.439	129.44	0.82876	0.00039982
8771	Itch	130.28/121.66/128.98	127.59/480.71/205.01	128.98	205.01	0.66444	0.00040156
34226	Lrrc46	66.586/72.998/115.73	104.39/487.86/130.19	72.998	130.19	0.82606	0.00040243
37851	Tsc22d2	58.48/61.846/68.022	58.887/123.04/114.47	61.846	114.47	0.87769	0.00040338
21513	Sult4a1	148.23/125.72/114.84	200.75/203.16/119.71	125.72	200.75	0.67093	0.00040376
55909	E430025E21Rik	45.163/42.582/83.923	33.904/90.132/104	45.163	90.132	0.98124	0.00040396
35022	Trim32	50.953/41.568/64.488	76.731/98.716/105.5	50.953	98.716	0.94064	0.00040406
26218	0610007P14Rik	59.059/38.527/36.22	34.797/140.21/80.058	38.527	80.058	1.0361	0.00040468
13387	Pold1	45.742/54.749/45.937	42.827/349.08/91.281	45.937	91.281	0.9753	0.00040503
19934	Taf10	39.372/39.541/42.403	27.659/167.39/81.554	39.541	81.554	1.026	0.00041171
63114	Triml1	133.17/137.89/137.81	140.97/499.3/216.23	137.81	216.23	0.64611	0.00041231
78583	Gm21950	64.849/44.61/22.968	89.222/140.21/43.396	44.61	89.222	0.98413	0.00041302
1250	Atp4b	134.33/165.26/128.09	147.22/416.33/211.74	134.33	211.74	0.65262	0.00041303
2098	Casp14	130.28/134.84/114.84	159.71/440.65/206.5	130.28	206.5	0.66053	0.00041352
48164	Ccdc65	171.39/120.65/127.21	202.53/284.7/118.96	127.21	202.53	0.66676	0.00041356
34447	Tmem45a2	111.75/101.39/97.174	168.63/689.58/118.96	101.39	168.63	0.72836	0.00041373
3679	Cst9	97.852/85.165/95.407	160.6/260.38/95.77	95.407	160.6	0.74521	0.00041666
30447	Gprasp1	111.17/87.192/90.107	153.46/247.51/104.75	90.107	153.46	0.76162	0.0004167
4287	Dmpk	64.27/62.86/71.556	117.77/171.68/62.101	64.27	117.77	0.86372	0.00041698
30617	Bag4	88.009/79.081/69.789	123.13/233.2/138.42	79.081	138.42	0.79987	0.00041809
21289	Ing4	90.904/115.58/94.524	113.31/406.31/159.37	94.524	159.37	0.74744	0.00042028
29046	Hrasls5	92.641/102.4/94.524	49.072/310.46/159.37	94.524	159.37	0.74744	0.00042028
72892	Gm10439	54.427/57.79/68.905	85.653/281.84/108.49	57.79	108.49	0.89714	0.00042054
25357	Tmem9b	126.22/84.151/90.107	85.653/175.97/153.38	90.107	153.38	0.76086	0.00042312
9090	Kcnj8	81.061/69.957/56.538	94.575/665.26/125.7	69.957	125.7	0.83638	0.00042414
71174	Zfp78	58.48/69.957/105.12	56.21/141.64/125.7	69.957	125.7	0.83638	0.00042414
11474	Nek1	100.17/131.8/86.573	166.85/175.97/118.96	100.17	166.85	0.73038	0.0004259
11010	Map4	86.272/106.46/85.69	109.74/151.65/148.14	86.272	148.14	0.77311	0.00042652
7378	Hbb-bh1	145.91/207.84/172.26	182.01/608.04/259.63	172.26	259.63	0.58901	0.00043042
2696	Ift81	32.424/30.416/46.82	24.09/94.424/70.331	32.424	70.331	1.0936	0.00043077
59047	Brat1	39.951/43.596/47.704	66.024/483.57/87.54	43.596	87.54	0.9894	0.00043133
62539	Gpatch3	80.482/32.444/55.654	105.28/204.59/59.856	55.654	105.28	0.90764	0.00043349
22564	Cenpo	26.634/32.444/61.838	20.521/240.35/70.331	32.444	70.331	1.0928	0.00043494
7623	Hk1	85.693/63.873/73.322	130.26/141.64/106.99	73.322	130.26	0.8206	0.00043539
40292	Perm1	120.43/77.054/68.022	99.929/144.5/135.42	77.054	135.42	0.80556	0.00043555
58546	Ahdc1	121.01/81.109/76.856	140.97/520.77/89.784	81.109	140.97	0.78998	0.00043778
33668	Tmco1	114.64/81.109/68.905	140.97/297.58/83.05	81.109	140.97	0.78998	0.00043778
7314	Hist2h3c1	13.896/46.638/48.587	23.198/240.35/92.029	46.638	92.029	0.96557	0.00043806
60133	Heatr3	49.795/50.693/89.224	49.964/103.01/98.014	50.693	98.014	0.93766	0.00043825
50144	2610305D13Rik	27.792/49.679/53.888	23.198/248.94/96.518	49.679	96.518	0.94427	0.00043904
65780	Olfr710	110.59/94.289/79.506	158.82/267.54/80.806	94.289	158.82	0.74602	0.00043912
19674	Esyt1	115.8/111.53/105.12	182.91/181.7/120.46	111.53	181.7	0.69919	0.00043954
71261	Hapln4	90.904/74.012/73.322	131.16/263.24/42.648	74.012	131.16	0.81705	0.00044131
21759	Usp21	105.96/98.345/107.78	87.438/396.3/174.33	105.96	174.33	0.71303	0.00044137
30917	Ccar1	105.96/67.929/73.322	125.8/407.74/130.19	73.322	130.19	0.81976	0.00044248
21508	Pmm1	88.009/63.873/68.905	124.02/289/115.97	68.905	124.02	0.83867	0.00044364
52210	Kctd12b	112.91/98.345/93.641	164.17/472.12/126.45	98.345	164.17	0.73342	0.00044514
19327	Ikzf2	111.75/121.66/113.96	141.86/346.22/184.81	113.96	184.81	0.69268	0.00044586
61664	Krtap27-1	79.324/86.179/65.372	103.5/297.58/138.42	79.324	138.42	0.79551	0.00044721
48500	Ffar4	85.114/70.971/86.573	146.32/177.4/28.432	85.114	146.32	0.77467	0.00044739
57485	Slc25a25	60.217/88.206/84.807	76.731/248.94/145.9	84.807	145.9	0.77567	0.00044798
41549	Etnk1	78.745/102.4/89.224	82.977/256.09/151.89	89.224	151.89	0.76087	0.00044816
13210	Plcb2	79.903/93.276/70.672	139.19/396.3/78.561	79.903	139.19	0.79308	0.00044949
67017	Olfr351	187.6/154.11/122.79	236.44/334.78/101.01	154.11	236.44	0.61429	0.00044949
19936	Taf10	46.9/55.763/64.488	105.28/108.73/70.331	55.763	105.28	0.90489	0.00045011
49511	Tbx10	52.69/75.026/90.99	69.593/289/132.43	75.026	132.43	0.81154	0.00045322
5511	Fgf1	145.33/119.64/174.91	102.61/377.7/225.21	145.33	225.21	0.62842	0.00045447
47515	Zc3h10	104.22/138.9/184.63	93.683/735.37/216.98	138.9	216.98	0.6398	0.00045527
16039	Slc31a1	40.53/63.873/53.888	24.982/343.36/102.5	53.888	102.5	0.91513	0.00045718
34885	Tfpt	141.86/156.14/140.46	176.66/354.81/220.72	141.86	220.72	0.63417	0.00045822
15934	Slc16a1	112.91/64.887/63.605	94.575/204.59/118.22	64.887	118.22	0.8555	0.00045909
40378	1700017B05Rik	35.898/30.416/75.973	13.383/230.34/75.568	35.898	75.568	1.0532	0.00045914
78418	Fsbp	118.7/75.026/75.089	79.408/207.45/132.43	75.089	132.43	0.81034	0.00046149
33490	Ldah	72.376/53.735/67.139	121.34/530.78/65.842	67.139	121.34	0.84438	0.00046335
45214	Ctns	81.64/70.971/95.407	91.007/400.59/141.41	81.64	141.41	0.78514	0.00046344
381	Adra1b	121.59/127.75/113.08	115.1/330.49/194.53	121.59	194.53	0.67355	0.0004636
32207	Mpnd	56.164/81.109/81.273	107.07/230.34/140.66	81.109	140.66	0.78684	0.00046554
44047	Zfp712	158.65/103.41/123.68	197.18/226.05/80.058	123.68	197.18	0.66863	0.00046804
22303	Hnrnpu	8.6851/21.291/20.318	8.03/52.935/50.13	20.318	50.13	1.2621	0.0004703
26024	Rhbg	136.65/104.43/105.12	106.17/237.49/172.83	105.12	172.83	0.71195	0.0004728
23234	Gipc2	118.7/80.095/75.089	139.19/346.22/83.799	80.095	139.19	0.78966	0.00047383
30756	Map1lc3b	38.214/35.485/35.336	44.611/80.118/74.82	35.485	74.82	1.0553	0.00047404
21900	Mrps7	33.003/35.485/51.237	19.629/270.4/74.82	35.485	74.82	1.0553	0.00047404
40974	Kcnk16	74.113/79.081/52.121	82.084/331.92/130.94	74.113	130.94	0.8127	0.0004757
58432	Tesk2	74.113/58.804/79.506	110.64/1108.8/130.94	74.113	130.94	0.8127	0.0004757
49242	Trmt10a	64.849/61.846/59.188	66.024/559.39/113.73	61.846	113.73	0.86831	0.00047857
32859	Rraga	36.477/32.444/50.354	45.503/105.87/76.317	36.477	76.317	1.0448	0.00047986
50467	Tsga13	161.54/150.05/161.66	245.36/258.95/115.22	161.54	245.36	0.59995	0.00048064
27928	Tmed6	55.585/69.957/53.004	66.917/216.03/104.75	55.585	104.75	0.90215	0.00048102
54980	Utp6	99.01/97.331/101.59	87.438/165.96/164.6	99.01	164.6	0.72759	0.00048281
30325	2810474O19Rik	107.7/97.331/89.224	95.468/173.11/162.36	97.331	162.36	0.73233	0.00048341
14795	Rnf4	36.477/36.499/66.255	33.904/263.24/76.317	36.499	76.317	1.0439	0.00048464
17517	Tgfb1	88.588/62.86/62.722	115.1/187.42/84.547	62.86	115.1	0.86235	0.00048591
25467	Zfp109	64.27/79.081/83.04	63.348/211.74/137.67	79.081	137.67	0.79211	0.00048618
497	Agtr2	130.86/107.47/81.273	175.77/220.32/74.82	107.47	175.77	0.70456	0.00048625
3369	Cpt1b	127.38/85.165/108.66	133.83/642.37/177.32	108.66	177.32	0.70148	0.00048701
58437	Ipo13	68.902/70.971/116.61	113.31/137.34/126.45	70.971	126.45	0.82441	0.0004889
23257	Arhgef7	106.54/54.749/72.439	128.48/124.47/130.19	72.439	128.48	0.81811	0.0004895
50964	Olfr138	48.637/59.818/82.156	54.425/261.81/110.73	59.818	110.73	0.8775	0.00049058
40531	Osbp2	91.483/57.79/64.488	120.45/117.32/95.022	64.488	117.32	0.85332	0.00049488
21829	Vapa	117.54/120.65/108.66	108.85/188.85/192.29	117.54	188.85	0.6795	0.00049554
44697	Cttnbp2nl	70.639/57.79/106.01	75.839/125.9/147.4	70.639	125.9	0.82487	0.00049783
37039	Rbm43	177.18/119.64/121.91	194.5/663.83/163.86	121.91	194.5	0.6696	0.00049792
41799	Fpgt	47.479/40.555/59.188	38.365/414.9/92.777	47.479	92.777	0.95189	0.00049874
51806	Lrrc4	73.534/62.86/68.022	122.23/140.21/75.568	68.022	122.23	0.83627	0.00049944
46082	Krt23	56.743/77.054/68.905	40.15/1573.7/123.45	68.905	123.45	0.83213	0.00050107
14321	Rab6a	62.533/61.846/80.39	68.701/822.64/114.47	62.533	114.47	0.86201	0.00050359
25228	Brinp1	86.272/52.721/63.605	115.99/196/56.863	63.605	115.99	0.85665	0.0005038
25900	Fxyd7	107.12/128.76/83.923	107.96/206.02/175.08	107.12	175.08	0.70364	0.00050522
24241	Tdp2	156.91/127.75/148.41	228.41/260.38/222.22	148.41	228.41	0.61863	0.00050529
11998	Ddr2	77.587/75.026/83.04	73.162/234.63/135.42	77.587	135.42	0.79574	0.00050561
45967	Nkd1	57.901/64.887/76.856	117.77/268.97/55.367	64.887	117.77	0.85014	0.0005064
46862	AU040320	92.641/64.887/61.838	117.77/980.01/67.338	64.887	117.77	0.85014	0.0005064
22164	C1s1	89.167/80.095/106.89	124.02/404.88/151.14	89.167	151.14	0.7547	0.00050886
6873	Grb7	78.166/113.55/75.089	124.91/439.22/136.17	78.166	136.17	0.79304	0.00051032
29703	Uqcrc2	90.904/100.37/103.36	84.761/436.36/166.1	100.37	166.1	0.72105	0.00051068
37658	Nanog	141.28/118.62/100.71	94.575/228.91/190.04	118.62	190.04	0.67541	0.00051343
9505	Krt33b	129.7/118.62/117.49	190.04/347.65/57.612	118.62	190.04	0.67541	0.00051346
47035	Ttll3	114.06/83.137/69.789	113.31/300.44/142.91	83.137	142.91	0.77432	0.00051564
26767	Rbp7	115.22/106.46/125.44	185.58/254.66/173.58	115.22	185.58	0.68292	0.00051605
17750	Tlx1	130.28/69.957/89.224	115.1/289/151.14	89.224	151.14	0.75379	0.00051621
7381	Hbb-y	147.65/126.73/122.79	150.79/220.32/200.52	126.73	200.52	0.65778	0.00051648
77200	Mup9	24.897/45.624/23.852	33.904/442.08/57.612	24.897	57.612	1.1784	0.00051781
10915	Meis3	88.009/32.444/57.421	107.07/256.09/66.59	57.421	107.07	0.88736	0.00051903
62134	Dhrs9	103.06/96.317/89.224	160.6/246.08/106.99	96.317	160.6	0.73166	0.00052039
37890	Kdelc1	91.483/64.887/124.56	99.929/321.9/154.13	91.483	154.13	0.74621	0.0005206
28795	Ubr7	207.86/201.76/199.65	148.11/452.09/294.79	201.76	294.79	0.54481	0.00052071
50163	Vmn1r42	107.7/94.289/84.807	90.114/303.3/157.87	94.289	157.87	0.73746	0.0005224
29264	Acot13	94.378/81.109/67.139	140.08/447.8/67.338	81.109	140.08	0.78088	0.00052247
50683	Bsnd	117.54/96.317/109.54	130.26/589.44/178.07	109.54	178.07	0.69595	0.00052248
59033	Micall2	72.955/52.721/45.054	58.887/107.3/100.26	52.721	100.26	0.91449	0.00052313
57882	Ythdf1	92.062/95.303/86.573	79.408/181.7/154.88	92.062	154.88	0.74415	0.00052337
51562	Vmn1r185	122.75/111.53/164.31	123.13/540.79/195.28	122.75	195.28	0.6655	0.00052355
13597	Ppp5c	111.17/113.55/145.76	114.2/403.45/183.31	113.55	183.31	0.68612	0.00052395
30439	Rab3c	98.431/100.37/127.21	165.95/456.38/128.69	100.37	165.95	0.71977	0.00052423
15782	St6galnac1	65.428/75.026/75.089	74.947/154.51/131.68	75.026	131.68	0.80342	0.00052866
77248	Plac9b	87.43/102.4/90.99	92.791/450.66/153.38	90.99	153.38	0.74694	0.00052905
15208	Sag	162.7/105.44/120.14	191.83/377.7/142.91	120.14	191.83	0.6706	0.0005297
59337	Pyroxd1	42.847/47.652/105.12	36.581/253.23/92.777	47.652	92.777	0.94675	0.00053262
53349	Pde12	90.325/60.832/86.573	95.468/326.19/147.4	86.573	147.4	0.76088	0.00053263
38565	Dzip1l	121.01/78.068/86.573	139.19/280.41/147.4	86.573	147.4	0.76088	0.00053263
23615	Unc93b1	88.588/65.901/52.121	82.977/293.29/118.96	65.901	118.96	0.8425	0.00053302
77363	Gm2663	111.75/137.89/113.08	136.51/263.24/182.56	113.08	182.56	0.68627	0.0005349
48526	Yars	23.16/19.263/55.654	34.797/331.92/54.619	23.16	54.619	1.2029	0.000537
14958	Polr1a	56.743/27.374/22.085	61.563/64.38/21.698	27.374	61.563	1.1407	0.00053724
49856	Pigh	133.75/97.331/105.12	129.37/223.19/172.09	105.12	172.09	0.70573	0.00053831
43773	9230104L09Rik	154.59/85.165/117.49	188.26/466.4/158.62	117.49	188.26	0.67556	0.00054051
4174	Twist2	145.91/113.55/117.49	188.26/321.9/107.74	117.49	188.26	0.67556	0.00054051
55882	Trio	65.428/69.957/64.488	86.545/231.77/118.22	65.428	118.22	0.84372	0.00054289
68132	Ss18	72.955/45.624/53.888	76.731/243.21/101.76	53.888	101.76	0.90466	0.00054808
28198	Ndufc1	78.745/86.179/83.923	74.947/309.03/143.65	83.923	143.65	0.76838	0.00054856
7218	H2-D1	101.91/102.4/114.84	113.31/196/168.35	102.4	168.35	0.71173	0.00055193
31791	1810043G02Rik	92.641/114.57/100.71	88.33/658.11/166.1	100.71	166.1	0.71629	0.00055241
10126	Ncr1	114.06/91.248/106.01	173.09/337.64/70.331	106.01	173.09	0.70212	0.00055329
56175	Ubxn7	99.589/86.179/115.73	144.54/752.53/164.6	99.589	164.6	0.71927	0.00055373
34636	Hilpda	79.324/87.192/68.905	93.683/137.34/139.17	79.324	137.34	0.78436	0.00055415
41877	Yipf7	88.588/85.165/129.86	149.89/407.74/120.46	88.588	149.89	0.75215	0.00055521
65941	Olfr1158	92.641/55.763/51.237	104.39/214.6/18.705	55.763	104.39	0.89272	0.00055673
2328	Cct3	49.795/66.915/78.623	84.761/120.18/122.71	66.915	120.18	0.83531	0.00055754
16259	Snrk	147.07/135.86/116.61	134.73/384.85/211.74	135.86	211.74	0.63642	0.00055822
41130	Stx11	110.01/93.276/89.224	156.14/218.89/136.17	93.276	156.14	0.73708	0.00055959
21741	Slc46a2	100.75/115.58/142.23	96.36/392/185.55	115.58	185.55	0.67827	0.00055989
68904	Kdm3b	90.325/65.901/74.206	130.26/145.93/59.856	74.206	130.26	0.80356	0.00056092
4225	Dio2	85.114/127.75/79.506	100.82/300.44/145.15	85.114	145.15	0.76314	0.00056095
17830	Cd40	147.65/140.93/170.5	103.5/228.91/226.71	147.65	226.71	0.61528	0.00056219
65673	Olfr1012	247.24/182.5/168.73	270.34/341.93/106.99	182.5	270.34	0.56437	0.00056568
60417	Scn3b	75.271/61.846/81.273	84.761/158.8/131.68	75.271	131.68	0.79878	0.00056626
48669	Pi4kb	57.322/61.846/63.605	68.701/177.4/112.98	61.846	112.98	0.85887	0.00056656
39050	Appl1	101.33/81.109/91.874	140.97/167.39/154.13	91.874	154.13	0.74013	0.00057346
55496	Slc17a2	76.429/100.37/67.139	69.593/935.66/133.18	76.429	133.18	0.79322	0.00057708
72616	4930590J08Rik	138.96/121.66/165.2	139.19/353.38/215.48	138.96	215.48	0.62922	0.0005773
27028	Mrps22	86.851/105.44/87.457	99.929/236.06/148.14	87.457	148.14	0.75366	0.00057928
43436	Hyal4	110.01/78.068/126.33	98.144/185.99/178.07	110.01	178.07	0.68983	0.00057961
25866	Dnajb7	58.48/59.818/76.856	100.82/183.13/109.99	59.818	109.99	0.8678	0.00058224
73975	Plcxd2	152.28/91.248/107.78	131.16/593.73/175.08	107.78	175.08	0.69488	0.00058567
10591	Meox1	93.22/81.109/84.807	112.42/144.5/153.38	84.807	144.5	0.76184	0.000587
45504	Gpr87	142.44/103.41/119.26	157.92/220.32/190.04	119.26	190.04	0.66775	0.00058711
23682	Nup210	89.746/101.39/87.457	102.61/603.74/151.14	89.746	151.14	0.74546	0.00058856
67622	Olfr575	120.43/113.55/127.21	142.76/347.65/191.54	120.43	191.54	0.66499	0.0005895
2281	Ccne2	89.746/77.054/73.322	107.07/173.11/133.93	77.054	133.93	0.78965	0.00058972
25856	Tacc2	169.07/94.289/128.98	202.53/442.08/103.25	128.98	202.53	0.64702	0.00059204
23748	Nphs1	198.6/129.77/156.36	237.33/299.01/139.17	156.36	237.33	0.59888	0.00059391
21093	Ip6k1	66.007/68.943/82.156	66.024/570.84/122.71	68.943	122.71	0.82266	0.00059417
56208	E330017A01Rik	134.91/82.123/101.59	166.85/1340.5/90.532	101.59	166.85	0.71022	0.00059502
28559	Asrgl1	112.91/87.192/101.59	166.85/656.68/31.424	101.59	166.85	0.71022	0.00059502
51880	Rfpl4	169.07/157.15/173.15	103.5/253.23/267.11	169.07	253.23	0.58	0.00059674
52190	Hectd1	28.371/39.541/30.919	66.917/87.271/51.626	30.919	66.917	1.0893	0.00059693
49466	Orai1	130.28/116.59/113.96	186.47/403.45/108.49	116.59	186.47	0.67287	0.00059762
31891	Mak16	12.738/17.236/40.637	24.09/75.826/44.144	17.236	44.144	1.3078	0.00059867
2181	Cbfb	45.163/76.04/45.937	106.17/0/89.784	45.937	89.784	0.95172	0.00060017
20294	Prnd	71.218/60.832/83.923	125.8/0/127.94	71.218	125.8	0.81216	0.00060125
2116	Casp9	152.28/161.2/159.9	128.48/290.43/241.67	159.9	241.67	0.59286	0.00060261
58317	Haus6	11.58/11.153/25.619	14.276/131.62/33.669	11.58	33.669	1.4625	0.0006042
54879	Arhgap44	121.59/112.54/109.54	181.12/612.33/70.331	112.54	181.12	0.68171	0.00060476
71527	Mamld1	145.91/112.54/112.19	181.12/525.06/121.96	112.54	181.12	0.68171	0.00060476
48188	Mal2	79.903/72.998/89.224	69.593/247.51/137.67	79.903	137.67	0.77738	0.00060737
76548	Bod1l	57.901/71.984/55.654	107.07/264.67/89.036	57.901	107.07	0.87556	0.00060855
73970	Gm5483	96.115/139.91/97.174	132.94/416.33/160.86	97.174	160.86	0.72136	0.000609
76280	Vmn2r3	148.8/121.66/133.39	117.77/303.3/208	133.39	208	0.63704	0.0006103
34152	Pdzph1	90.904/68.943/80.39	138.29/490.72/104.75	80.39	138.29	0.77522	0.00061182
35846	Arhgap17	80.482/53.735/86.573	119.56/278.98/138.42	80.482	138.42	0.77486	0.00061211
46505	Mfsd6	79.903/79.081/70.672	136.51/233.2/116.72	79.081	136.51	0.77999	0.0006122
55473	Larp4b	77.587/80.095/77.739	68.701/258.95/134.68	77.739	134.68	0.78501	0.00061245
13133	Pkig	63.691/64.887/61.838	39.258/416.33/115.22	63.691	115.22	0.84527	0.00061297
23645	Mefv	71.218/83.137/54.771	44.611/289/125.7	71.218	125.7	0.81097	0.00061453
12554	Pax9	134.33/84.151/90.99	152.57/178.83/110.73	90.99	152.57	0.73934	0.00061463
44562	9130019O22Rik	90.325/65.901/95.407	151.68/456.38/134.68	90.325	151.68	0.7414	0.00061478
10212	Smad4	63.691/75.026/107.78	69.593/349.08/130.94	75.026	130.94	0.79527	0.00061556
72726	Adam26b	83.956/70.971/99.824	61.563/143.07/170.59	83.956	143.07	0.76196	0.00061932
33074	Nufip2	71.797/92.262/68.022	73.162/175.97/126.45	71.797	126.45	0.80794	0.00062115
21184	Nelfe	51.532/38.527/48.587	47.288/423.48/93.525	48.587	93.525	0.93073	0.00062416
2324	Cct2	19.107/36.499/19.435	6.2455/52.935/47.885	19.435	47.885	1.2584	0.00062548
52143	Bptf	117.54/111.53/120.14	149/187.42/227.45	117.54	187.42	0.66858	0.00062552
61071	Atad5	56.743/52.721/97.174	105.28/260.38/32.173	56.743	105.28	0.88019	0.00062756
54581	Cdc34	98.431/87.192/121.03	115.99/344.79/162.36	98.431	162.36	0.71628	0.00062767
68420	Aak1	87.43/78.068/79.506	66.024/444.94/136.92	79.506	136.92	0.77667	0.00063268
9737	Ldha	28.95/28.388/42.403	35.689/226.05/63.597	28.95	63.597	1.1089	0.00063469
28373	Fis1	132.01/119.64/117.49	146.32/304.73/190.04	119.64	190.04	0.66324	0.00063492
3190	Col4a1	86.272/66.915/64.488	119.56/133.05/68.086	66.915	119.56	0.82792	0.00063677
18221	Tub	105.96/110.51/105.12	172.2/228.91/94.273	105.96	172.2	0.69538	0.00063708
69923	Msrb3	123.33/86.179/114.84	183.8/185.99/115.97	114.84	183.8	0.67378	0.00063773
13216	Plcb3	83.956/85.165/74.206	72.27/598.02/142.91	83.956	142.91	0.76034	0.00063861
50239	Cldn16	37.056/41.568/47.704	41.042/379.13/83.05	41.568	83.05	0.98147	0.00063876
32355	B230217C12Rik	79.903/106.46/151.06	99.929/253.23/172.83	106.46	172.83	0.69397	0.00063889
14610	Rela	72.955/48.666/72.439	132.94/0/127.19	72.439	127.19	0.80371	0.00063898
18226	Tuba1b	20.844/34.471/31.802	16.952/221.75/68.086	31.802	68.086	1.0746	0.00063978
4124	Dhx15	63.112/76.04/57.421	114.2/118.75/49.381	63.112	114.2	0.84553	0.00064129
43626	Jrkl	74.113/91.248/90.107	52.641/218.89/151.14	90.107	151.14	0.73973	0.00064359
44641	Trim39	35.898/21.291/28.269	62.455/0/80.058	28.269	62.455	1.1164	0.00064545
7147	Guk1	44.005/46.638/64.488	34.797/95.855/90.532	46.638	90.532	0.94218	0.00064578
3461	Pcdha4	52.69/46.638/38.87	68.701/124.47/90.532	46.638	90.532	0.94218	0.00064578
43931	Ascc3	42.847/46.638/63.605	34.797/612.33/90.532	46.638	90.532	0.94218	0.00064578
69540	Fam168a	68.902/84.151/50.354	122.23/310.46/62.849	68.902	122.23	0.818	0.00064838
58401	Skint10	117.54/61.846/89.224	149.89/158.8/132.43	89.224	149.89	0.74195	0.00065082
62618	Cct8l1	135.49/115.58/143.11	130.26/403.45/210.24	135.49	210.24	0.63015	0.00065127
933	Apoc1	123.91/109.5/139.58	195.4/636.65/130.94	123.91	195.4	0.65291	0.00065149
15017	Rps29	20.844/30.416/37.986	16.06/104.44/65.842	30.416	65.842	1.0893	0.00065203
46791	Cyp2j11	116.96/83.137/86.573	146.32/194.57/80.058	86.573	146.32	0.75043	0.00065214
76540	Gm7694	127.38/137.89/126.33	199.86/474.98/145.9	127.38	199.86	0.64573	0.00065232
826	Ap3b1	107.7/107.47/151.06	65.132/270.4/174.33	107.7	174.33	0.68979	0.00065284
2388	Cd28	97.273/96.317/115.73	160.6/665.26/142.16	97.273	160.6	0.71756	0.00065318
48986	U2af1	31.845/31.43/57.421	23.198/114.45/68.086	31.845	68.086	1.0727	0.00065324
32792	Ndufa8	86.272/95.303/79.506	71.378/419.19/145.9	86.272	145.9	0.75124	0.0006545
66664	Olfr272	86.272/118.62/85.69	91.007/357.67/145.9	86.272	145.9	0.75124	0.0006545
11526	Nfatc2ip	115.22/91.248/86.573	152.57/160.24/93.525	91.248	152.57	0.73531	0.00065461
26132	Rab37	55.006/52.721/53.888	50.857/151.65/101.01	53.888	101.01	0.89412	0.00065546
7421	Ptpn6	39.372/41.568/40.637	46.395/104.44/81.554	40.637	81.554	0.98749	0.00065597
30914	Ccar1	46.9/62.86/79.506	62.455/1070.1/113.73	62.86	113.73	0.84523	0.00065892
19257	Zfp94	63.691/42.582/49.471	94.575/111.59/40.403	49.471	94.575	0.9212	0.00066246
64897	Olfr1123	123.91/116.59/156.36	176.66/723.92/195.28	123.91	195.28	0.65206	0.00066339
55062	Scrn2	92.062/72.998/74.206	64.24/130.19/129.44	74.206	129.44	0.79446	0.0006635
61323	Tnpo1	107.7/109.5/143.99	128.48/437.79/176.58	109.5	176.58	0.68442	0.00066521
25173	Lamtor3	49.795/42.582/69.789	48.18/108.73/95.022	49.795	95.022	0.91868	0.00066659
57741	Trib3	90.325/76.04/78.623	82.977/191.71/135.42	78.623	135.42	0.77685	0.00067023
73049	Fndc5	94.957/102.4/90.99	191.83/157.37/42.648	94.957	157.37	0.72287	0.00067107
23873	Hes6	128.54/109.5/109.54	112.42/273.26/176.58	109.54	176.58	0.68384	0.00067168
18553	Urod	83.377/68.943/71.556	41.042/208.88/125.7	71.556	125.7	0.80423	0.00067667
30276	Rnpc3	25.476/65.901/50.354	29.443/194.57/95.77	50.354	95.77	0.91408	0.0006772
27833	Msmo1	161.54/105.44/113.08	181.12/610.9/74.072	113.08	181.12	0.67491	0.00067843
35463	Ctsll3	68.323/63.873/95.407	121.34/28.613/121.21	68.323	121.21	0.81795	0.00067942
60455	Gm4894	100.17/99.359/83.923	76.731/716.77/163.11	99.359	163.11	0.70948	0.00068263
2231	Cbx4	122.17/99.359/97.174	103.5/217.46/163.11	99.359	163.11	0.70948	0.00068263
44841	Calm4	85.693/82.123/59.188	140.08/194.57/65.842	82.123	140.08	0.76318	0.0006828
27788	Rgcc	86.272/99.359/106.01	82.084/163.1/174.33	99.359	163.1	0.70938	0.00068398
12184	Olfr33	106.54/108.48/123.68	107.96/434.92/175.08	108.48	175.08	0.68551	0.00068451
19301	Zic1	123.91/90.234/103.36	148.11/257.52/168.35	103.36	168.35	0.69843	0.00068641
15383	Ccl2	230.44/189.59/200.53	229.3/433.49/291.05	200.53	291.05	0.53521	0.00068663
16499	Serpinb6a	93.22/65.901/84.807	95.468/164.53/143.65	84.807	143.65	0.75345	0.00068885
50332	Brdt	84.535/72.998/54.771	127.59/261.81/87.54	72.998	127.59	0.79719	0.00069003
32237	Atp5s	83.377/72.998/70.672	127.59/464.97/106.99	72.998	127.59	0.79719	0.00069003
63246	Layn	92.641/84.151/79.506	142.76/237.49/95.77	84.151	142.76	0.75552	0.00069089
50794	Emid1	121.59/84.151/83.923	142.76/589.44/94.273	84.151	142.76	0.75552	0.00069089
69601	Cep295	42.268/34.471/61.838	46.395/203.16/83.799	42.268	83.799	0.97076	0.00069184
54180	Neurl3	94.378/116.59/117.49	108.85/824.07/185.55	116.59	185.55	0.66577	0.00069346
69135	Klk15	87.43/95.303/90.99	85.653/414.9/151.89	90.99	151.89	0.73289	0.00069658
38300	Cyp2c65	52.111/72.998/66.255	75.839/131.62/118.22	66.255	118.22	0.82586	0.00069687
25657	Nelfcd	42.268/28.388/31.802	67.809/0/68.086	31.802	67.809	1.0688	0.00069704
46065	Mepe	66.586/61.846/74.206	118.67/364.82/38.158	66.586	118.67	0.82421	0.00069845
34710	Kansl2	8.6851/23.319/10.601	9.8144/31.475/53.871	10.601	31.475	1.4851	0.00070037
10150	Lyz2	77.587/59.818/60.955	91.007/349.08/110.73	60.955	110.73	0.85078	0.00070621
30603	Med4	22.002/33.458/53.004	19.629/287.57/70.331	33.458	70.331	1.0497	0.00070889
15486	Sec23a	59.059/67.929/85.69	87.438/273.26/120.46	67.929	120.46	0.81731	0.0007089
22028	Rgs1	96.694/108.48/85.69	124.02/227.48/159.37	96.694	159.37	0.71503	0.00070913
71151	B4galnt3	70.639/63.873/110.43	105.28/175.97/124.2	70.639	124.2	0.80544	0.00070984
45693	Pcdhgc5	63.112/48.666/67.139	94.575/363.39/113.73	63.112	113.73	0.83954	0.00071197
67784	Ly6g5b	51.532/85.165/51.237	97.252/324.76/95.022	51.532	97.252	0.9033	0.00071478
74772	Olfr765	69.481/75.026/81.273	69.593/130.19/146.65	75.026	130.19	0.78711	0.00071492
2622	Cdh9	80.482/77.054/61.838	132.94/293.29/56.115	77.054	132.94	0.77906	0.00071755
36458	4933405L10Rik	99.01/67.929/124.56	78.515/589.44/162.36	99.01	162.36	0.70791	0.00071774
73662	Olfr322	42.268/56.776/70.672	57.994/633.79/104.75	56.776	104.75	0.87208	0.00071783
62999	Nars2	36.477/56.776/59.188	20.521/379.13/104.75	56.776	104.75	0.87208	0.00071783
45168	Prp2	170.23/151.07/129.86	229.3/256.09/175.83	151.07	229.3	0.59882	0.00071933
38653	Zufsp	63.112/59.818/60.955	110.64/650.96/85.295	60.955	110.64	0.84951	0.00072182
45896	Pcdhb8	100.17/122.68/137.81	109.74/193.14/198.27	122.68	193.14	0.65052	0.00072367
40332	Elp3	13.896/22.305/34.453	31.228/496.44/52.374	22.305	52.374	1.1955	0.000724
25857	Tacc2	88.009/102.4/88.34	148.11/462.11/78.561	88.34	148.11	0.73898	0.00072712
71178	Bsph1	74.113/117.61/75.089	99.929/131.62/130.19	75.089	130.19	0.78586	0.00072796
48354	Trip10	135.49/111.53/162.55	132.05/420.62/209.5	135.49	209.5	0.62503	0.00072818
1606	Cxcr5	134.91/144.98/122.79	128.48/446.37/208.75	134.91	208.75	0.62602	0.00072936
47843	0610010K14Rik	134.91/96.317/156.36	130.26/213.17/208.75	134.91	208.75	0.62602	0.00072936
53681	Wdr19	38.793/56.776/42.403	55.318/251.8/83.799	42.403	83.799	0.96624	0.00073013
10627	Foxc1	64.27/71.984/56.538	49.072/140.21/115.22	64.27	115.22	0.83241	0.00073125
31217	Ctdp1	11.001/37.513/10.601	18.737/323.33/32.173	11.001	32.173	1.4668	0.00073288
56789	Nmrk1	57.901/55.763/77.739	67.809/393.44/106.24	57.901	106.24	0.86455	0.00073441
27962	Tmem218	116.96/108.48/115.73	88.33/502.17/184.06	115.73	184.06	0.66485	0.00073606
27767	Nenf	48.637/65.901/62.722	60.671/113.02/130.19	62.722	113.02	0.83947	0.00073675
58291	Fam206a	121.01/90.234/99.824	163.28/439.22/71.827	99.824	163.28	0.70428	0.00073761
57864	Ppp1r3d	119.85/69.957/70.672	124.02/161.67/85.295	70.672	124.02	0.80266	0.00074406
57372	BC029214	127.38/117.61/137.81	198.97/632.36/74.072	127.38	198.97	0.63931	0.0007482
20471	Pclo	148.23/108.48/103.36	201.64/174.54/64.345	108.48	174.54	0.6811	0.00074845
21726	Tor2a	90.904/64.887/54.771	135.62/111.59/115.97	64.887	115.97	0.82808	0.00074928
20432	Ror2	64.27/67.929/63.605	115.1/264.67/63.597	64.27	115.1	0.83084	0.00075148
50674	Mrps6	44.005/37.513/68.905	25.874/446.37/86.043	44.005	86.043	0.95166	0.00075535
78063	Tgfbr3l	131.43/71.984/90.107	173.09/150.22/86.043	90.107	150.22	0.73102	0.00076087
13961	Pten	101.33/140.93/93.641	165.06/397.73/142.16	101.33	165.06	0.69854	0.00076238
30868	Abhd15	79.903/72.998/75.973	131.16/181.7/31.424	75.973	131.16	0.77983	0.00076299
11221	Myh6	151.7/130.79/138.69	91.007/419.19/213.24	138.69	213.24	0.61694	0.00076496
6528	Glra1	124.49/105.44/104.24	170.41/181.7/121.21	105.44	170.41	0.68742	0.00076802
39935	Rap2b	53.848/64.887/48.587	69.593/161.67/100.26	53.848	100.26	0.88455	0.00077158
11308	Ppp1r12a	74.692/84.151/85.69	66.917/423.48/142.16	84.151	142.16	0.74952	0.00077314
16882	Stxbp2	67.165/46.638/76.856	46.395/157.37/118.96	67.165	118.96	0.8155	0.00077709
30826	Pdcl	76.429/75.026/132.51	72.27/137.34/131.68	76.429	131.68	0.77705	0.00077734
24150	Pfpl	65.428/70.971/81.273	80.3/238.92/124.2	70.971	124.2	0.79877	0.00077957
71193	Nlrp9c	76.429/56.776/57.421	105.28/224.62/65.842	57.421	105.28	0.86333	0.00078316
26913	Itm2c	49.216/60.832/37.986	84.761/193.14/93.525	49.216	93.525	0.91256	0.00078323
60281	Spg7	58.48/42.582/40.637	96.36/0/83.799	42.582	83.799	0.9603	0.00078333
18118	Tpt1	37.056/44.61/67.139	51.749/157.37/86.791	44.61	86.791	0.94473	0.00078421
4237	Dlg1	79.903/103.41/131.63	63.348/341.93/167.6	103.41	167.6	0.69126	0.00078928
48247	Mfsd5	165.02/119.64/122.79	192.72/593.73/129.44	122.79	192.72	0.64604	0.00079073
14691	Rfxank	93.22/93.276/79.506	82.084/231.77/154.13	93.22	154.13	0.71937	0.00079323
76815	Myh15	87.43/62.86/71.556	124.91/130.19/59.856	71.556	124.91	0.79524	0.00079471
72505	9430007A20Rik	78.166/134.84/77.739	90.114/499.3/133.93	78.166	133.93	0.76924	0.00079519
54414	Mageb18	152.28/121.66/121.91	124.91/333.35/191.54	121.91	191.54	0.64756	0.00079623
17748	Nr2e1	87.43/66.915/80.39	51.749/251.8/136.92	80.39	136.92	0.76093	0.00079801
44538	Asb15	147.65/158.16/148.41	95.468/313.32/225.21	148.41	225.21	0.59836	0.00079956
4586	Ear2	88.588/93.276/132.51	82.084/472.12/154.13	93.276	154.13	0.71852	0.00080366
1847	Cab39	30.687/64.887/31.802	22.306/526.49/67.338	31.802	67.338	1.0589	0.00080501
6991	Hspa5	6.3691/13.18/11.484	5.3533/81.548/32.921	11.484	32.921	1.4421	0.00080643
45086	Sgpp1	79.324/74.012/96.291	74.947/221.75/135.42	79.324	135.42	0.7642	0.00080648
66657	Olfr1126	141.86/126.73/130.74	158.82/390.57/202.76	130.74	202.76	0.62916	0.00080702
29412	Lman2	44.584/27.374/32.686	68.701/95.855/48.633	32.686	68.701	1.049	0.00080739
3204	Col4a4	60.217/68.943/72.439	48.18/307.59/121.21	68.943	121.21	0.8051	0.00081235
44770	Wwox	110.59/69.957/84.807	142.76/250.37/69.583	84.807	142.76	0.74445	0.00081528
57191	Eif5b	15.633/17.236/27.385	21.413/48.643/43.396	17.236	43.396	1.2837	0.00081872
37790	Fbxo22	99.589/140.93/98.941	195.4/140.21/162.36	99.589	162.36	0.69958	0.00081889
1972	Camk2a	94.378/108.48/122.79	173.98/40.059/205.01	108.48	173.98	0.6765	0.00082081
71813	Hist1h3a	7.5271/24.333/32.686	11.599/184.56/55.367	24.333	55.367	1.1538	0.00082254
77277	Gm20809	100.17/104.43/102.47	104.39/327.62/166.1	102.47	166.1	0.69144	0.00082548
33121	Pmvk	33.582/34.471/68.905	71.378/0/86.791	34.471	71.378	1.0289	0.00082596
22603	Dhrs1	44.584/39.541/49.471	86.545/91.563/73.324	44.584	86.545	0.94152	0.00082705
35640	St13	55.006/58.804/103.36	37.473/161.67/106.99	58.804	106.99	0.85262	0.00082729
3673	Cst8	68.902/41.568/41.52	82.084/0/92.029	41.568	82.084	0.96479	0.00082772
38547	Ier5l	57.901/67.929/98.058	82.977/616.62/119.71	67.929	119.71	0.80839	0.00082886
71113	Zfp786	110.59/108.48/125.44	176.66/316.18/99.511	110.59	176.66	0.6709	0.00082929
45421	Slc25a2	112.33/104.43/91.874	168.63/204.59/82.302	104.43	168.63	0.68613	0.00082937
65425	Olfr490	145.91/147.01/188.16	180.23/223.19/237.18	147.01	223.19	0.59899	0.00082939
5081	Lcn5	179.49/151.07/159.01	238.22/316.18/95.022	159.01	238.22	0.58017	0.00083082
24702	Ncoa6	72.376/50.693/75.973	125.8/489.29/95.022	72.376	125.8	0.78921	0.00083291
61750	Fsd1	89.746/65.901/55.654	116.88/248.94/62.101	65.901	116.88	0.81723	0.00083324
11188	Myf6	137.8/100.37/87.457	163.28/171.68/98.014	100.37	163.28	0.69646	0.0008349
6749	Gpc1	101.33/104.43/83.923	169.52/164.53/98.014	101.33	164.53	0.69389	0.00083499
28321	Psmd6	48.637/57.79/91.874	55.318/273.26/105.5	57.79	105.5	0.85716	0.00083954
30399	Med31	53.848/57.79/95.407	41.934/715.34/105.5	57.79	105.5	0.85716	0.00083954
41010	Cd200r3	121.01/125.72/117.49	173.98/446.37/190.04	121.01	190.04	0.64687	0.00083988
33918	Ydjc	101.91/126.73/106.01	113.31/208.88/170.59	106.01	170.59	0.68124	0.00084379
47551	Psme4	82.219/67.929/75.089	72.27/134.48/129.44	75.089	129.44	0.77761	0.00084445
16069	Slc4a3	57.901/35.485/43.287	64.24/223.19/84.547	43.287	84.547	0.94984	0.00084603
53773	A630033H20Rik	93.22/125.72/138.69	120.45/297.58/196.03	125.72	196.03	0.63677	0.00084641
52958	Irgc1	86.272/91.248/142.23	91.007/160.24/151.14	91.248	151.14	0.72178	0.00084806
22929	Txnl1	81.061/56.776/58.305	106.17/0/108.49	58.305	106.17	0.85374	0.00084867
53510	Trmt1	68.902/74.012/98.941	57.102/164.53/127.94	74.012	127.94	0.78153	0.00084918
27361	Cwc15	72.376/69.957/106.89	65.132/281.84/125.7	72.376	125.7	0.78802	0.0008507
45503	Pi4k2a	130.86/105.44/151.95	202.53/440.65/148.14	130.86	202.53	0.62631	0.00085315
51088	Xpnpep2	125.64/106.46/111.31	149.89/177.4/181.06	111.31	177.4	0.66767	0.00085505
57995	Fcrl1	85.693/75.026/106.89	165.06/0/143.65	85.693	143.65	0.73863	0.00085998
50296	Clic1	86.851/55.763/136.04	82.977/859.83/145.15	86.851	145.15	0.73433	0.0008682
8262	Ier5	94.378/95.303/137.81	146.32/233.2/156.37	95.303	156.37	0.70854	0.00086823
12334	Orc2	30.687/37.513/57.421	21.413/75.826/117.47	37.513	75.826	0.99624	0.00086979
74748	Ccl26	77.008/42.582/45.937	88.33/140.21/37.41	45.937	88.33	0.92842	0.00086999
12860	Cfp	145.33/147.01/125.44	149/722.49/220.72	145.33	220.72	0.5995	0.00087148
1139	Asgr1	125.07/124.71/105.12	131.16/623.77/194.53	124.71	194.53	0.63736	0.00087248
13554	Ppp1cb	33.003/79.081/86.573	16.952/211.74/134.68	79.081	134.68	0.76063	0.00087428
73228	Rnf39	147.07/124.71/114.84	194.5/537.93/132.43	124.71	194.5	0.63715	0.00087627
41979	Rai14	74.692/72.998/95.407	71.378/145.93/128.69	74.692	128.69	0.77686	0.00087966
42372	Ccdc125	66.007/58.804/60.071	117.77/0/108.49	60.071	108.49	0.84222	0.00088133
31205	4930523C07Rik	58.48/63.873/60.071	27.659/151.65/108.49	60.071	108.49	0.84222	0.00088133
51913	Dhrs11	89.167/91.248/71.556	65.132/622.34/148.14	89.167	148.14	0.72603	0.00088328
31178	Anp32b	140.7/99.359/84.807	110.64/300.44/161.61	99.359	161.61	0.69626	0.00088379
21068	Mmel1	89.746/86.179/94.524	113.31/240.35/148.89	89.746	148.89	0.72402	0.00088678
67617	Olfr559	133.17/100.37/118.38	154.35/467.83/186.3	118.38	186.3	0.64986	0.00088703
109	Acp2	122.75/112.54/118.38	108.85/638.08/186.3	118.38	186.3	0.64986	0.00088703
76261	Vmn1r60	179.49/155.12/136.04	232.87/519.33/121.21	155.12	232.87	0.58304	0.00088816
3754	Cttn	83.956/84.151/98.058	115.99/143.07/141.41	84.151	141.41	0.74196	0.00088897
26026	Sorcs1	119.85/85.165/83.04	142.76/157.37/83.799	85.165	142.76	0.73845	0.00089104
50503	Mta3	167.33/133.83/131.63	206.1/206.02/156.37	133.83	206.02	0.61861	0.00089195
69457	Itga11	43.426/74.012/42.403	51.749/153.08/84.547	43.426	84.547	0.94533	0.00089208
28382	Cdc26	25.476/43.596/34.453	24.982/566.55/71.079	34.453	71.079	1.0237	0.00089336
24064	Akr1e1	93.799/114.57/105.12	89.222/181.7/169.09	105.12	169.09	0.68057	0.00089338
45253	Fthl17	30.108/28.388/49.471	20.521/114.45/64.345	30.108	64.345	1.0708	0.00089526
62757	H1fx	116.96/89.22/91.874	154.35/151.65/134.68	91.874	151.65	0.7169	0.00089717
51393	Acot2	92.062/75.026/92.757	84.761/238.92/151.89	92.062	151.89	0.71618	0.00089969
10232	Mafg	81.64/43.596/33.569	84.761/234.63/51.626	43.596	84.761	0.9434	0.00090068
43034	Arpc2	19.686/34.471/36.22	20.521/469.26/71.079	34.471	71.079	1.0229	0.0009008
38492	Prr5l	80.482/69.957/73.322	126.7/243.21/101.01	73.322	126.7	0.78084	0.00090243
51055	Arr3	101.91/107.47/140.46	179.34/104.44/172.09	107.47	172.09	0.6742	0.00090243
26255	Cdc42ep5	127.38/97.331/96.291	158.82/364.82/50.13	97.331	158.82	0.70069	0.00090384
48324	Dlk2	157.49/147.01/168.73	165.95/319.04/235.68	157.49	235.68	0.57857	0.00090589
63123	Sgol2b	144.17/144.98/155.48	112.42/287.57/219.97	144.98	219.97	0.59806	0.00091048
44628	Hdac9	94.378/94.289/102.47	73.162/175.97/154.88	94.378	154.88	0.70869	0.00091094
71163	Gm766	80.482/112.54/83.923	140.97/250.37/44.892	83.923	140.97	0.74136	0.00091141
64589	Olfr1333	11.001/18.25/31.802	12.491/153.08/44.892	18.25	44.892	1.2534	0.0009118
70339	Pkn1	137.8/88.206/90.99	113.31/446.37/150.39	90.99	150.39	0.7187	0.00091188
58522	Adgrb2	104.22/78.068/78.623	133.83/595.16/65.842	78.623	133.83	0.75992	0.00091254
30567	Paxbp1	31.266/35.485/70.672	32.12/268.97/72.576	35.485	72.576	1.0119	0.00091404
30801	Frmd8	147.65/109.5/126.33	196.29/247.51/136.17	126.33	196.29	0.63177	0.00091545
42793	Glt8d1	78.745/59.818/47.704	107.96/301.87/65.842	59.818	107.96	0.84121	0.00091591
50579	Tirap	87.43/66.915/71.556	87.438/151.65/124.2	71.556	124.2	0.78709	0.00091705
50152	Vmn1r47	170.81/169.32/197	139.19/937.09/252.14	170.81	252.14	0.55917	0.00091721
37461	Fam217a	98.431/77.054/73.322	107.07/539.36/131.68	77.054	131.68	0.76545	0.00091727
40281	Stk40	83.377/59.818/66.255	116.88/147.36/86.043	66.255	116.88	0.80961	0.00092337
37235	Plbd2	99.01/76.04/75.089	130.26/234.63/72.576	76.04	130.26	0.7688	0.00092532
67390	Olfr652	107.12/80.095/100.71	106.17/371.98/163.11	100.71	163.11	0.69021	0.00092576
35300	Cmtm8	50.953/41.568/45.054	123.13/0/86.791	45.054	86.791	0.93077	0.00092584
63826	Dusp15	125.07/93.276/95.407	156.14/572.27/82.302	95.407	156.14	0.70482	0.00092652
69805	Ccdc79	109.43/92.262/100.71	164.17/163.1/128.69	100.71	163.1	0.69012	0.00092753
30855	Slc47a1	63.112/61.846/61.838	83.869/420.62/110.73	61.846	110.73	0.83018	0.00092817
65518	Olfr847	132.01/163.23/124.56	203.43/390.57/152.63	132.01	203.43	0.62001	0.00092999
33966	Cdk12	48.058/60.832/53.888	54.425/340.5/99.511	53.888	99.511	0.8728	0.00093063
43105	Mzt1	26.634/56.776/53.888	16.952/143.07/99.511	53.888	99.511	0.8728	0.00093063
18654	Vars	24.897/66.915/59.188	35.689/506.46/106.99	59.188	106.99	0.84339	0.00093253
40977	Kcnk16	126.22/101.39/152.83	101.71/380.56/196.03	126.22	196.03	0.63104	0.00093332
19506	Dmtf1	54.427/47.652/60.071	85.653/183.13/100.26	54.427	100.26	0.8694	0.0009346
21346	Rtcb	47.479/82.123/105.12	49.964/185.99/138.42	82.123	138.42	0.74609	0.00093529
10753	Mmp11	66.007/82.123/97.174	73.162/248.94/138.42	82.123	138.42	0.74609	0.00093529
27951	1810009A15Rik	68.902/72.998/54.771	120.45/190.28/58.36	68.902	120.45	0.79696	0.00093839
61157	Gdf7	107.7/101.39/101.59	164.17/0/184.06	101.59	164.17	0.68703	0.00094082
43021	Arfrp1	29.529/38.527/45.054	57.102/278.98/77.065	38.527	77.065	0.98184	0.00094129
24981	Pard6a	84.535/128.76/94.524	115.99/321.9/154.88	94.524	154.88	0.70648	0.00094209
22809	Rnasek	104.8/66.915/107.78	165.06/287.57/168.35	104.8	168.35	0.67863	0.0009428
21298	Usp39	26.634/68.943/69.789	55.318/237.49/120.46	68.943	120.46	0.79624	0.00094715
24656	B4galt6	158.07/125.72/107.78	138.29/413.46/195.28	125.72	195.28	0.63128	0.00094815
46246	Cadm3	100.75/130.79/142.23	96.36/201.72/208.75	130.79	201.72	0.6213	0.00095007
46513	Rabif	68.902/41.568/39.753	112.42/81.548/53.871	41.568	81.548	0.95546	0.00095352
60984	Ankrd52	140.7/112.54/133.39	171.31/319.04/205.01	133.39	205.01	0.61623	0.00095367
2570	Arhgap31	70.06/60.832/66.255	33.904/220.32/116.72	66.255	116.72	0.80764	0.00095492
51634	Trpm8	67.165/39.541/32.686	78.515/190.28/27.683	39.541	78.515	0.97186	0.00095832
45302	Tex11	108.85/96.317/75.089	67.809/331.92/157.12	96.317	157.12	0.70028	0.00096149
56707	Cd226	103.64/96.317/81.273	89.222/317.61/157.12	96.317	157.12	0.70028	0.00096149
15612	Foxp3	79.324/96.317/79.506	134.73/223.19/116.72	79.506	134.73	0.75352	0.00096616
42199	1700007G11Rik	92.641/86.179/80.39	84.761/719.63/143.65	86.179	143.65	0.73057	0.00096848
485	Agt	67.165/41.568/63.605	60.671/134.48/112.98	63.605	112.98	0.81904	0.00096946
31445	Samsn1	112.33/86.179/83.04	143.65/278.98/95.022	86.179	143.65	0.7305	0.00096976
3573	Cs	39.372/42.582/45.054	29.443/82.979/94.273	42.582	82.979	0.94629	0.00097035
59803	Olfr553	62.533/40.555/90.99	50.857/422.05/111.48	62.533	111.48	0.82412	0.00097076
10426	Mc1r	155.75/169.32/166.96	105.28/393.44/246.91	166.96	246.91	0.56165	0.00097587
36562	4933413G19Rik	109.43/90.234/72.439	149/250.37/69.583	90.234	149	0.71733	0.00097648
33312	1110032F04Rik	86.851/100.37/63.605	145.43/144.5/90.532	86.851	144.5	0.72787	0.00097786
45201	Lamtor2	23.16/49.679/26.502	40.15/77.256/58.36	26.502	58.36	1.1099	0.00097837
40193	Opa1	62.533/57.79/60.955	34.797/588.01/109.24	60.955	109.24	0.83133	0.00098028
44928	Erap1	72.955/50.693/60.955	75.839/261.81/109.24	60.955	109.24	0.83133	0.00098028
57491	Pip5kl1	86.851/47.652/85.69	93.683/410.6/142.91	85.69	142.91	0.73119	0.0009857
35333	Sdr9c7	47.479/66.915/67.139	72.27/273.26/117.47	66.915	117.47	0.80269	0.00098749
59896	Atxn2l	72.376/60.832/78.623	86.545/185.99/124.95	72.376	124.95	0.77947	0.00098769
52405	Phldb2	166.18/126.73/104.24	196.29/410.6/82.302	126.73	196.29	0.62717	0.00098974
3816	Cyp1a1	135.49/115.58/118.38	185.58/493.58/117.47	118.38	185.58	0.6443	0.00099236
64393	Olfr1331	86.851/92.262/83.923	43.719/233.2/144.4	86.851	144.4	0.72693	0.00099483
13939	Ptbp1	86.851/81.109/110.43	138.29/177.4/144.4	86.851	144.4	0.72693	0.00099483
14838	Rorc	42.847/44.61/52.121	41.934/85.84/89.036	44.61	85.84	0.92901	0.00099935
24792	Rbx1	9.8431/19.263/40.637	8.9222/221.75/46.389	19.263	46.389	1.2257	0.0010009
4557	Dyrk1a	110.59/95.303/103.36	127.59/729.64/166.1	103.36	166.1	0.67918	0.0010016
78454	Gm8923	88.009/87.192/118.38	90.114/599.45/145.9	88.009	145.9	0.7228	0.0010027
26368	Ngly1	152.28/110.51/112.19	177.55/334.78/89.036	112.19	177.55	0.65757	0.001003
72317	Nsl1	22.581/35.485/25.619	55.318/286.13/56.863	25.619	56.863	1.1202	0.0010047
69927	Lrrc58	61.375/91.248/76.856	115.99/157.37/130.94	76.856	130.94	0.76095	0.0010063
35801	Dhrs13	77.587/90.234/132.51	98.144/148.79/148.89	90.234	148.79	0.7153	0.0010137
51139	Pdzd3	198.6/125.72/128.98	198.97/260.38/119.71	128.98	198.97	0.6215	0.0010165
56186	Dirc2	64.849/61.846/71.556	79.408/512.18/114.47	64.849	114.47	0.81035	0.0010168
19818	Rai2	148.23/98.345/132.51	203.43/277.55/88.288	132.51	203.43	0.61463	0.0010202
50290	Krt82	132.01/134.84/122.79	138.29/371.98/202.76	132.01	202.76	0.61532	0.0010253
70038	Cenpt	33.582/44.61/43.287	40.15/207.45/83.799	43.287	83.799	0.93717	0.0010259
74768	1190007I07Rik	122.17/89.22/97.174	88.33/324.76/157.87	97.174	157.87	0.69444	0.0010259
32386	Arl13b	60.796/93.276/62.722	34.797/595.16/111.48	62.722	111.48	0.81984	0.0010266
34552	Hemk1	99.01/48.666/55.654	105.28/101.58/89.036	55.654	101.58	0.85646	0.0010285
46936	Upk3b	121.01/89.22/76.856	152.57/147.36/71.079	89.22	147.36	0.71757	0.0010295
12053	Gpr143	203.81/169.32/175.8	170.41/778.29/257.38	175.8	257.38	0.54741	0.0010329
13682	Mapk11	80.482/78.068/78.623	117.77/143.07/133.18	78.623	133.18	0.75292	0.0010335
17185	Tcea1	70.06/77.054/74.206	115.99/143.07/127.19	74.206	127.19	0.76942	0.0010363
59422	Zfp628	88.588/115.58/98.941	111.53/164.53/160.12	98.941	160.12	0.68894	0.0010384
54855	Flcn	35.319/57.79/52.121	30.336/248.94/96.518	52.121	96.518	0.87639	0.0010392
17740	Tlr6	94.957/84.151/98.941	123.13/184.56/154.88	94.957	154.88	0.69995	0.00104
20596	Aifm1	127.38/123.69/130.74	115.1/384.85/196.78	127.38	196.78	0.62344	0.0010409
34544	Avpi1	66.007/35.485/39.753	78.515/240.35/57.612	39.753	78.515	0.96432	0.001043
46334	B3gnt9	116.96/98.345/100.71	162.38/606.61/114.47	100.71	162.38	0.68384	0.0010456
76717	Vmn1r103	62.533/63.873/76.856	58.887/323.33/112.98	63.873	112.98	0.81306	0.0010487
1780	Bub1b	106.54/85.165/82.156	141.86/273.26/138.42	85.165	141.86	0.72947	0.0010492
13941	Ptbp1	106.54/99.359/98.058	160.6/251.8/149.64	99.359	160.6	0.68726	0.0010493
41004	Cds1	105.96/99.359/100.71	140.08/563.69/162.36	100.71	162.36	0.68362	0.0010499
67968	Sptlc1	143.59/100.37/142.23	137.4/324.76/215.48	142.23	215.48	0.59594	0.0010517
25969	Il17re	63.112/90.234/67.139	61.563/459.25/117.47	67.139	117.47	0.79795	0.001052
76903	Gm9112	98.431/93.276/101.59	61.563/300.44/159.37	98.431	159.37	0.68961	0.0010526
41083	Lrrc74b	98.431/97.331/78.623	157.92/238.92/60.604	97.331	157.92	0.69261	0.001053
57931	Stoml3	77.587/70.971/84.807	53.533/310.46/131.68	77.587	131.68	0.75563	0.0010534
70911	Gm14325	59.059/70.971/97.174	65.132/198.86/122.71	70.971	122.71	0.78143	0.0010542
23718	Sfrp5	111.75/95.303/78.623	155.25/1.4307/172.09	95.303	155.25	0.69817	0.0010556
58363	Pars2	59.059/49.679/80.39	79.408/160.24/106.24	59.059	106.24	0.83646	0.0010561
75763	Vmn2r35	44.005/54.749/45.937	44.611/868.42/87.54	45.937	87.54	0.9156	0.0010596
57258	Aamp	25.476/50.693/35.336	24.982/173.11/71.827	35.336	71.827	1.0031	0.0010598
52991	Lrch2	163.28/113.55/133.39	150.79/735.37/204.26	133.39	204.26	0.61098	0.0010636
66959	Olfr477	93.799/104.43/98.058	158.82/278.98/130.19	98.058	158.82	0.69006	0.0010638
27818	Mrps28	48.637/56.776/69.789	36.581/103.01/128.69	56.776	103.01	0.84815	0.0010639
59821	Ipo7	5.7901/22.305/10.601	7.1378/244.65/30.676	10.601	30.676	1.4492	0.001066
54915	Neurl4	123.91/132.82/148.41	111.53/669.56/203.51	132.82	203.51	0.61192	0.0010663
55352	Fam161b	88.588/91.248/81.273	146.32/231.77/40.403	88.588	146.32	0.71762	0.0010663
24710	Nudt3	111.17/104.43/136.04	105.28/274.69/175.83	111.17	175.83	0.65666	0.0010696
14089	Ptpn2	122.75/101.39/115.73	124.02/181.7/183.31	115.73	181.7	0.64632	0.0010696
3914	Cyp3a13	146.49/96.317/104.24	97.252/433.49/166.85	104.24	166.85	0.67346	0.0010702
10334	Mark3	59.059/84.151/57.421	106.17/144.5/63.597	59.059	106.17	0.83551	0.0010724
58182	Gbp5	130.28/101.39/98.058	132.05/309.03/163.11	101.39	163.11	0.68062	0.0010743
27446	Ppih	81.64/69.957/52.121	95.468/287.57/121.21	69.957	121.21	0.78434	0.0010781
4707	Efna2	105.96/67.929/81.273	136.51/180.26/59.856	81.273	136.51	0.74104	0.0010792
7720	Foxa1	130.28/83.137/95.407	155.25/224.62/63.597	95.407	155.25	0.69661	0.0010807
26529	Evc	101.33/74.012/78.623	132.94/0/148.14	78.623	132.94	0.75034	0.0010813
16230	Snapin	39.372/38.527/68.905	33.012/160.24/77.813	39.372	77.813	0.96506	0.0010816
8997	Kcna5	96.694/81.109/96.291	80.3/331.92/156.37	96.291	156.37	0.69382	0.0010867
4580	E4f1	107.7/122.68/107.78	91.007/250.37/171.34	107.78	171.34	0.66389	0.001087
361	Adora2b	58.48/92.262/56.538	105.28/214.6/82.302	58.48	105.28	0.83743	0.0010918
63349	Nim1k	61.954/90.234/77.739	103.5/184.56/131.68	77.739	131.68	0.75283	0.0010954
66280	Olfr491	64.27/47.652/80.39	113.31/120.18/87.54	64.27	113.31	0.80849	0.0010968
8455	Il10ra	64.27/40.555/51.237	82.977/257.52/95.022	51.237	95.022	0.87828	0.0010981
23974	Cpxm2	93.22/81.109/83.04	122.23/138.78/160.12	83.04	138.78	0.73396	0.0010988
73823	Itprip	76.429/76.04/68.905	129.37/286.13/89.784	76.04	129.37	0.75896	0.0010994
31315	Ost4	86.272/72.998/87.457	71.378/143.07/159.37	86.272	143.07	0.72315	0.0011017
9198	Kif17	69.481/61.846/77.739	120.45/251.8/52.374	69.481	120.45	0.78506	0.0011018
24091	Gtpbp2	112.91/83.137/90.107	111.53/198.86/148.14	90.107	148.14	0.71107	0.0011031
71359	Rgag4	75.85/28.388/56.538	105.28/54.366/102.5	56.538	102.5	0.8471	0.0011047
29998	Cuedc2	82.798/76.04/93.641	76.731/214.6/138.42	82.798	138.42	0.73442	0.0011059
45268	Pramel1	138.96/89.22/157.25	173.09/324.76/210.99	138.96	210.99	0.59898	0.0011096
11042	Mthfd2	61.375/57.79/79.506	67.809/190.28/109.24	61.375	109.24	0.82158	0.0011115
36839	Ptk7	20.844/32.444/48.587	67.809/67.242/51.626	32.444	67.242	1.0289	0.0011143
13940	Ptbp1	94.378/64.887/66.255	98.144/329.05/115.97	66.255	115.97	0.79844	0.0011145
62851	Ppp6r1	87.43/85.165/120.14	144.54/251.8/113.73	87.43	144.54	0.7188	0.0011147
9377	Klra10	125.07/111.53/124.56	192.72/646.66/140.66	124.56	192.72	0.6256	0.0011157
50615	Stk33	107.12/102.4/105.12	167.74/0/171.34	105.12	167.74	0.66902	0.0011166
50786	Ubox5	97.273/108.48/128.09	132.05/173.11/172.09	108.48	172.09	0.66078	0.0011169
6457	Gjb1	155.75/129.77/134.28	135.62/1251.8/205.01	134.28	205.01	0.60678	0.0011219
58055	Prune	90.904/62.86/79.506	104.39/233.2/133.93	79.506	133.93	0.74502	0.0011227
23502	Cacng6	121.59/160.19/132.51	135.62/283.27/202.76	132.51	202.76	0.60994	0.0011237
47738	Gldc	106.54/110.51/82.156	169.52/505.03/130.94	106.54	169.52	0.66512	0.0011251
39567	1810009J06Rik	77.587/67.929/60.071	61.563/163.1/118.22	67.929	118.22	0.7904	0.0011266
56301	Bnip1	30.687/35.485/74.206	49.072/91.563/71.827	35.485	71.827	0.99717	0.0011293
35014	Tmem147	49.795/59.818/73.322	58.887/406.31/106.99	59.818	106.99	0.82837	0.0011302
42871	Prss8	169.07/126.73/114.84	195.4/643.8/142.16	126.73	195.4	0.62064	0.0011305
58416	Efcab14	147.65/88.206/96.291	156.14/238.92/147.4	96.291	156.14	0.69166	0.0011311
59943	Fbxl19	142.44/89.22/96.291	156.14/168.82/106.99	96.291	156.14	0.69166	0.0011311
30614	Bag4	82.798/71.984/90.107	138.29/140.21/51.626	82.798	138.29	0.73315	0.0011312
30163	Zmat5	44.584/43.596/54.771	33.012/155.94/85.295	44.584	85.295	0.92076	0.0011349
40929	Mau2	74.692/54.749/71.556	123.13/861.27/112.23	71.556	123.13	0.77465	0.0011357
45040	Vmn1r172	120.43/93.276/108.66	172.2/247.51/80.058	108.66	172.2	0.65941	0.0011375
17861	Pglyrp1	100.17/86.179/84.807	142.76/270.4/100.26	86.179	142.76	0.72157	0.0011396
13176	Pla2g5	123.33/100.37/102.47	164.17/174.54/148.89	102.47	164.17	0.67466	0.0011397
42684	1700019B03Rik	139.54/88.206/73.322	145.43/346.22/109.24	88.206	145.43	0.71501	0.0011422
21832	Slc7a9	113.49/81.109/105.12	94.575/174.54/167.6	105.12	167.6	0.66782	0.0011423
61075	Slfn9	92.062/90.234/74.206	148.11/452.09/99.511	90.234	148.11	0.70872	0.0011432
13248	Prl2c2	44.005/58.804/47.704	77.623/138.78/89.784	47.704	89.784	0.89841	0.0011434
31498	Caap1	51.532/44.61/44.17	29.443/178.83/85.295	44.61	85.295	0.91993	0.0011459
67055	Olfr522	108.27/115.58/136.93	110.64/324.76/181.06	115.58	181.06	0.64313	0.0011461
24928	Ikbke	112.33/86.179/93.641	152.57/533.64/52.374	93.641	152.57	0.69836	0.0011487
53283	Ptchd1	115.8/126.73/129.86	144.54/513.61/195.28	126.73	195.28	0.61979	0.00115
4065	Pcbd1	130.28/105.44/147.53	132.05/230.34/199.77	130.28	199.77	0.61293	0.001151
52897	Pgbd5	138.96/133.83/114.84	145.43/663.83/204.26	133.83	204.26	0.6063	0.001152
53335	Dennd6a	89.167/87.192/108.66	100.82/632.36/146.65	89.167	146.65	0.71149	0.0011535
56443	Zfp959	90.325/81.109/90.99	107.07/351.95/148.14	90.325	148.14	0.70762	0.0011603
60069	Zfp868	126.22/82.123/90.99	149/310.46/89.784	90.99	149	0.70541	0.0011646
14737	Rhag	82.798/94.289/89.224	65.132/291.86/146.65	89.224	146.65	0.71058	0.0011688
12191	Olfr44	104.8/72.998/61.838	124.91/0/135.42	72.998	124.91	0.76684	0.0011753
21984	Crim1	123.91/111.53/131.63	91.899/354.81/191.54	123.91	191.54	0.6243	0.0011756
64809	Olfr809	94.378/99.359/71.556	105.28/390.57/153.38	94.378	153.38	0.69477	0.0011801
47123	Ric8	97.852/107.47/78.623	157.92/167.39/130.94	97.852	157.92	0.68498	0.0011818
58693	Klhl17	138.96/107.47/101.59	170.41/387.71/96.518	107.47	170.41	0.66019	0.0011835
30546	Herc4	75.85/87.192/66.255	75.839/257.52/128.69	75.85	128.69	0.75496	0.0011925
3249	Col1a1	93.22/71.984/71.556	43.719/158.8/123.45	71.984	123.45	0.76994	0.0011943
4558	Dyrk1a	39.951/60.832/40.637	51.749/196/79.309	40.637	79.309	0.94772	0.0011945
3904	Cyp2j5	131.43/88.206/86.573	154.35/0/145.15	88.206	145.15	0.71225	0.0012004
72768	Pdp2	86.272/88.206/93.641	73.162/185.99/145.15	88.206	145.15	0.71225	0.0012004
29706	Polr3k	2.895/15.208/24.735	14.276/289/38.907	15.208	38.907	1.2999	0.001204
35174	Polr2i	13.896/15.208/29.152	4.4611/58.658/38.907	15.208	38.907	1.2999	0.001204
58886	Agpat9	79.324/65.901/72.439	124.02/569.41/85.295	72.439	124.02	0.76753	0.0012064
4784	Ei24	143.01/138.9/143.11	169.52/258.95/215.48	143.01	215.48	0.58803	0.0012074
57377	Rabl6	114.64/67.929/77.739	131.16/314.75/65.842	77.739	131.16	0.74709	0.0012101
23166	Nudt5	118.7/71.984/75.089	127.59/0/130.94	75.089	127.59	0.75699	0.0012101
53578	Ddx46	3.474/4.0555/24.735	6.2455/91.563/16.46	4.0555	16.46	1.7882	0.001211
77557	Gm20877	158.07/181.48/157.25	173.09/485/234.19	158.07	234.19	0.56416	0.0012183
19134	Zfp239	114.64/87.192/94.524	154.35/0/153.38	94.524	153.38	0.69256	0.0012193
2161	Runx1	57.322/77.054/83.923	93.683/380.56/130.19	77.054	130.19	0.74909	0.001221
9350	Klk1b27	123.33/124.71/150.18	128.48/217.46/192.29	124.71	192.29	0.62071	0.0012232
59834	Smg1	35.898/72.998/52.121	53.533/130.19/95.77	52.121	95.77	0.86528	0.0012354
22235	Slc7a8	105.38/76.04/74.206	154.35/128.76/102.5	76.04	128.76	0.75218	0.0012355
31434	Slc48a1	111.17/89.22/77.739	146.32/380.56/89.784	89.22	146.32	0.70747	0.0012362
29117	4933425L06Rik	119.85/120.65/128.98	162.38/290.43/187.05	120.65	187.05	0.62839	0.0012369
19487	Klf6	99.589/70.971/89.224	146.32/1.4307/157.87	89.224	146.32	0.70742	0.0012372
8929	Jak1	143.59/108.48/151.95	115.99/216.03/248.4	143.59	216.03	0.5859	0.0012372
75585	Smok3b	9.8431/22.305/26.502	10.707/87.271/50.878	22.305	50.878	1.1545	0.0012384
29252	Ttc1	42.268/24.333/65.372	36.581/94.424/81.554	42.268	81.554	0.93205	0.0012424
52968	Gm4763	93.22/69.957/64.488	91.899/180.26/120.46	69.957	120.46	0.77548	0.0012512
25129	Trim17	102.48/104.43/117.49	82.084/392/166.1	104.43	166.1	0.66446	0.0012577
53958	Arhgap29	93.22/42.582/49.471	91.899/92.994/23.942	49.471	91.899	0.88022	0.0012639
57313	Zcchc2	152.28/163.23/135.16	128.48/277.55/226.71	152.28	226.71	0.57101	0.0012658
25116	Adam21	68.323/86.179/91.874	121.34/309.03/142.16	86.179	142.16	0.71557	0.0012679
26342	Pole3	27.792/29.402/34.453	4.4611/429.2/62.101	29.402	62.101	1.0535	0.0012719
6546	Glud1	79.324/151.07/91.874	56.21/495.01/149.64	91.874	149.64	0.69776	0.0012753
39040	Cnih3	140.12/147.01/135.16	211.46/323.33/128.69	140.12	211.46	0.59025	0.0012758
43865	Ypel2	66.586/61.846/61.838	66.024/198.86/109.24	61.846	109.24	0.81073	0.0012763
73278	Tas2r104	74.113/62.86/59.188	110.64/133.05/50.13	62.86	110.64	0.80582	0.001277
7442	Hdac6	88.009/79.081/119.26	144.54/317.61/116.72	88.009	144.54	0.70939	0.001277
18315	Tyrp1	111.75/70.971/92.757	150.79/439.22/99.511	92.757	150.79	0.69503	0.0012787
14776	Xpr1	99.589/61.846/73.322	124.91/605.17/83.05	73.322	124.91	0.76053	0.0012796
38035	Seh1l	78.745/75.026/63.605	68.701/329.05/127.19	75.026	127.19	0.75377	0.0012835
46590	Qser1	89.167/76.04/79.506	85.653/337.64/133.18	79.506	133.18	0.737	0.0012905
41151	Ddit4	144.75/85.165/98.941	158.82/238.92/89.036	98.941	158.82	0.67726	0.0012908
51360	Vmn1r18	86.851/107.47/93.641	102.61/213.17/151.89	93.641	151.89	0.69191	0.0012917
67382	Olfr600	89.746/111.53/127.21	91.899/187.42/175.08	111.53	175.08	0.64598	0.0012936
63941	Olfr1066	78.745/103.41/120.14	74.947/231.77/164.6	103.41	164.6	0.66542	0.0012955
19291	Zfy2	148.8/103.41/103.36	193.61/0/164.6	103.41	164.6	0.66542	0.0012955
44324	Naa35	77.008/107.47/144.88	83.869/356.24/169.84	107.47	169.84	0.65537	0.0012968
42160	Slx1b	110.01/61.846/84.807	103.5/140.21/142.91	84.807	140.21	0.71864	0.0012986
40329	Rnd3	92.062/80.095/78.623	147.22/0/133.93	80.095	133.93	0.7345	0.0012999
34761	Cd164l2	140.12/80.095/72.439	103.5/196/133.93	80.095	133.93	0.7345	0.0012999
47937	Tdp1	64.849/80.095/123.68	80.3/286.13/133.93	80.095	133.93	0.7345	0.0012999
35436	Ogfrl1	86.851/85.165/94.524	86.545/190.28/142.91	86.851	142.91	0.712	0.0013003
21290	Mrpl50	128.54/122.68/114.84	154.35/238.92/189.3	122.68	189.3	0.62165	0.0013011
60024	Fgl1	87.43/71.984/130.74	99.929/463.54/143.65	87.43	143.65	0.71001	0.0013043
6498	Gclm	137.22/129.77/113.96	137.4/309.03/198.27	129.77	198.27	0.60767	0.0013045
41325	4930502E18Rik	50.953/57.79/76.856	103.5/123.04/101.01	57.79	103.5	0.82982	0.0013055
43780	Mrps5	26.055/75.026/51.237	18.737/270.4/94.273	51.237	94.273	0.86699	0.0013062
47228	Rrp8	70.06/78.068/70.672	74.054/344.79/121.21	70.672	121.21	0.76986	0.0013078
42880	Fam101b	89.167/78.068/114.84	99.929/145.93/176.58	89.167	145.93	0.70444	0.0013086
28895	Uba5	125.07/129.77/95.407	141.86/256.09/192.29	125.07	192.29	0.61658	0.0013088
51463	Vmn1r76	149.96/109.5/110.43	168.63/237.49/173.58	110.43	173.58	0.64784	0.0013104
54282	Slc43a2	49.216/76.04/50.354	50.857/92.994/115.22	50.354	92.994	0.87209	0.0013134
4971	Epb4.1l4a	25.476/26.36/37.986	37.473/57.227/58.36	26.36	57.227	1.0896	0.0013136
25771	Xrcc2	48.058/36.499/39.753	77.623/273.26/68.086	39.753	77.623	0.94804	0.0013199
18075	Trip6	168.49/158.16/162.55	239.12/331.92/111.48	162.55	239.12	0.55403	0.0013202
57072	Gm4847	74.692/80.095/95.407	133.83/236.06/90.532	80.095	133.83	0.73348	0.0013229
23958	Paxip1	39.372/100.37/68.905	69.593/118.75/131.68	68.905	118.75	0.7765	0.0013235
22633	Nit2	50.374/68.943/52.121	95.468/141.64/56.115	52.121	95.468	0.86077	0.0013238
1130	Arsa	148.23/125.72/124.56	155.25/247.51/193.04	125.72	193.04	0.61469	0.0013245
62359	Impad1	90.904/74.012/90.99	140.08/227.48/148.14	90.904	148.14	0.69851	0.001325
2546	Cdk1	10.422/31.43/50.354	1.7844/107.3/65.094	31.43	65.094	1.0272	0.0013257
65387	Olfr130	57.901/70.971/63.605	59.779/619.48/111.48	63.605	111.48	0.79998	0.0013257
40297	Gbe1	118.7/75.026/89.224	82.977/424.91/145.9	89.224	145.9	0.70325	0.0013325
31783	Mdp1	114.64/106.46/94.524	184.69/5.7227/168.35	106.46	168.35	0.65623	0.0013363
66177	Olfr410	176.02/122.68/147.53	220.38/855.54/178.82	147.53	220.38	0.57578	0.0013375
56082	Spryd3	50.374/39.541/33.569	41.042/77.256/95.77	39.541	77.256	0.94884	0.0013384
55055	Kat7	49.216/63.873/37.103	52.641/221.75/91.281	49.216	91.281	0.87789	0.0013415
75654	Rad54b	49.216/47.652/29.152	49.072/323.33/89.036	47.652	89.036	0.88801	0.0013438
61632	Ccdc14	87.43/72.998/79.506	132.94/104.44/137.67	79.506	132.94	0.73442	0.0013488
46409	Lrrc59	103.06/53.735/60.955	82.977/326.19/107.74	60.955	107.74	0.81161	0.0013491
65852	Olfr360	97.273/101.39/93.641	106.17/1048.7/156.37	97.273	156.37	0.67933	0.0013495
65592	Olfr775	92.641/93.276/99.824	105.28/276.12/151.14	93.276	151.14	0.69041	0.0013524
58590	Zbtb40	123.91/76.04/76.856	129.37/346.22/63.597	76.856	129.37	0.74375	0.001354
58769	Tada2b	159.23/156.14/158.13	129.37/469.26/233.44	158.13	233.44	0.55902	0.0013572
42525	Dnttip1	101.91/91.248/113.96	181.12/158.8/162.36	101.91	162.36	0.66674	0.0013577
20701	Klrk1	90.325/97.331/73.322	147.22/234.63/99.511	90.325	147.22	0.69862	0.0013636
12087	Nobox	28.95/33.458/38.87	53.533/236.06/68.086	33.458	68.086	1.0036	0.0013646
56470	Vmn2r120	75.271/95.303/69.789	68.701/231.77/127.19	75.271	127.19	0.74913	0.0013664
57265	Fam134a	154.59/85.165/92.757	167.74/124.47/150.39	92.757	150.39	0.69125	0.0013684
55457	Wdr60	64.849/65.901/109.54	129.37/113.02/114.47	65.901	114.47	0.78748	0.0013694
53055	Prrt3	85.693/44.61/54.771	99.036/236.06/68.835	54.771	99.036	0.84294	0.0013746
50991	Cdhr1	37.635/72.998/65.372	66.917/301.87/113.73	65.372	113.73	0.78956	0.0013759
15241	Sart1	20.844/52.721/41.52	16.952/147.36/80.058	41.52	80.058	0.93081	0.0013763
74916	Bpifa6	121.01/98.345/107.78	125.8/369.11/169.84	107.78	169.84	0.65131	0.0013804
61886	Slc16a12	91.483/61.846/57.421	108.85/221.75/44.892	61.846	108.85	0.80566	0.0013838
32690	Kdelc2	101.33/104.43/100.71	161.49/244.65/95.022	101.33	161.49	0.66719	0.0013839
57858	Stx16	56.743/45.624/53.004	89.222/419.19/96.518	53.004	96.518	0.8526	0.0013845
78141	Sco2	134.91/132.82/144.88	204.32/786.87/101.76	134.91	204.32	0.59523	0.0013866
62987	Chd2	33.003/22.305/67.139	55.318/91.563/67.338	33.003	67.338	1.007	0.0013877
23146	Celsr2	81.64/65.901/102.47	135.62/0/151.89	81.64	135.62	0.72523	0.0013909
14868	Rph3a	88.588/71.984/85.69	140.97/490.72/69.583	85.69	140.97	0.71166	0.0013957
19980	Usp18	100.17/84.151/85.69	140.97/177.4/77.065	85.69	140.97	0.71166	0.0013957
71572	Akap17b	79.324/153.09/130.74	127.59/246.08/199.02	130.74	199.02	0.60242	0.0013969
11658	Nipsnap1	123.33/116.59/111.31	138.29/273.26/181.06	116.59	181.06	0.63063	0.0013985
77652	Gm3646	133.75/117.61/120.14	185.58/200.29/127.19	120.14	185.58	0.6231	0.0013995
37323	Tars2	53.848/64.887/75.973	99.929/228.91/112.98	64.887	112.98	0.79069	0.0013997
30139	Lipt2	151.7/133.83/184.63	74.054/540.79/225.21	151.7	225.21	0.56696	0.001404
29634	Nuf2	101.33/44.61/62.722	103.5/201.72/109.99	62.722	109.99	0.80052	0.0014048
3698	Ctf1	90.904/77.054/75.973	82.084/616.62/129.44	77.054	129.44	0.74084	0.0014051
12887	Prf1	121.59/141.94/123.68	190.04/251.8/138.42	123.68	190.04	0.61571	0.0014053
41661	1700011I03Rik	34.74/20.277/24.735	54.425/198.86/32.921	24.735	54.425	1.1068	0.0014096
67421	Olfr646	216.55/144.98/130.74	216.81/323.33/109.24	144.98	216.81	0.57727	0.0014109
16439	Sphk1	111.17/93.276/98.058	120.45/241.78/157.12	98.058	157.12	0.6747	0.0014122
53637	Ifitm6	107.12/97.331/98.058	95.468/293.29/157.12	98.058	157.12	0.6747	0.0014122
59953	Fus	50.953/49.679/64.488	66.024/278.98/93.525	50.953	93.525	0.8635	0.0014137
65020	Olfr460	53.269/43.596/39.753	82.977/429.2/44.144	43.596	82.977	0.91307	0.0014139
2700	Cdx1	116.38/65.901/67.139	115.99/276.12/43.396	67.139	115.99	0.77982	0.0014189
66251	Olfr781	100.17/77.054/52.121	129.37/280.41/112.23	77.054	129.37	0.74009	0.0014228
9591	Ktn1	108.85/88.206/91.874	149/183.13/86.791	91.874	149	0.69163	0.0014231
66222	Olfr424	140.7/133.83/113.96	122.23/516.47/202.76	133.83	202.76	0.59575	0.0014262
7469	Hells	41.109/56.776/48.587	90.114/567.98/60.604	48.587	90.114	0.87771	0.001429
53203	Ncoa7	93.799/95.303/99.824	153.46/213.17/122.71	95.303	153.46	0.68159	0.001429
19028	Ywhae	37.056/31.43/44.17	49.072/138.78/73.324	37.056	73.324	0.96568	0.0014299
34352	Smco2	124.49/125.72/120.14	190.94/206.02/175.83	124.49	190.94	0.61309	0.0014334
60091	Klhl26	81.061/57.79/96.291	74.054/241.78/134.68	81.061	134.68	0.7254	0.0014347
36378	Ccdc105	107.12/91.248/63.605	148.11/563.69/56.863	91.248	148.11	0.69278	0.0014406
15640	Srsf5	86.851/83.137/79.506	137.4/629.5/49.381	83.137	137.4	0.71805	0.0014431
12603	Pcna	1.737/25.347/21.202	17.844/67.242/48.633	21.202	48.633	1.1606	0.0014442
1089	Arnt	88.588/94.289/89.224	145.43/310.46/90.532	89.224	145.43	0.69865	0.0014451
68525	Map1s	90.325/87.192/82.156	142.76/334.78/89.036	87.192	142.76	0.70489	0.0014456
52238	Wdr37	72.376/65.901/65.372	114.2/270.4/95.022	65.901	114.2	0.78409	0.0014462
42142	Klf17	38.793/46.638/49.471	54.425/87.271/96.518	46.638	87.271	0.88983	0.0014471
55177	Llgl2	71.797/86.179/126.33	47.288/284.7/141.41	86.179	141.41	0.70801	0.0014475
6766	S1pr2	44.584/59.818/57.421	44.611/227.48/102.5	57.421	102.5	0.82512	0.0014481
21787	Bin1	77.587/88.206/83.923	103.5/759.69/138.42	83.923	138.42	0.71518	0.0014501
77242	Mup16	33.003/47.652/37.103	36.581/143.07/73.324	37.103	73.324	0.96392	0.0014567
44802	Vps16	57.901/58.804/68.905	104.39/177.4/62.849	58.804	104.39	0.81742	0.0014594
76423	Smco3	147.65/117.61/126.33	202.53/193.14/121.21	126.33	193.14	0.60857	0.0014594
31250	l7Rn6	155.75/126.73/151.95	182.91/359.1/225.21	151.95	225.21	0.56464	0.0014619
54772	Efemp1	64.849/81.109/73.322	32.12/213.17/124.2	73.322	124.2	0.75238	0.001466
41481	Rfpl3s	64.27/48.666/35.336	90.114/211.74/59.856	48.666	90.114	0.87543	0.001467
8417	Il18bp	62.533/119.64/68.905	49.964/316.18/118.22	68.905	118.22	0.7701	0.0014695
34357	Mocs3	31.845/53.735/62.722	31.228/394.87/97.266	53.735	97.266	0.84424	0.0014742
47081	Wdr91	50.953/53.735/75.973	52.641/147.36/97.266	53.735	97.266	0.84424	0.0014742
35503	Poc1a	93.22/59.818/62.722	109.74/535.07/55.367	62.722	109.74	0.79736	0.0014769
18975	Xpa	133.17/146/176.68	134.73/683.86/217.73	146	217.73	0.57335	0.0014788
31506	Chd8	17.949/25.347/19.435	17.844/314.75/45.64	19.435	45.64	1.1905	0.0014803
23304	Rdh7	115.8/77.054/79.506	107.96/613.76/132.43	79.506	132.43	0.72893	0.001481
40140	Foxp4	55.585/66.915/55.654	99.929/566.55/42.648	55.654	99.929	0.83308	0.0014831
38216	1600014C23Rik	127.38/111.53/115.73	133.83/806.9/179.57	115.73	179.57	0.62942	0.0014832
54300	Trmt2b	104.22/68.943/67.139	131.16/0/118.22	68.943	118.22	0.76933	0.0014843
2817	Chgb	60.796/68.943/81.273	58.887/233.2/118.22	68.943	118.22	0.76933	0.0014843
30199	Spats2l	75.85/68.943/54.771	62.455/878.43/118.22	68.943	118.22	0.76933	0.0014843
10902	Mrc2	114.64/136.87/121.03	106.17/323.33/186.3	121.03	186.3	0.61818	0.0014859
42638	Zfp773	128.54/114.57/105.12	91.007/190.28/178.07	114.57	178.07	0.63181	0.001487
30082	Ikzf5	56.164/77.054/61.838	70.485/376.27/108.49	61.838	108.49	0.80108	0.0014887
31245	Hapln3	70.06/104.43/65.372	50.857/497.87/119.71	70.06	119.71	0.76447	0.0014895
19794	Dazap2	88.009/83.137/102.47	143.65/473.55/117.47	88.009	143.65	0.70052	0.0014927
76506	Gm7534	54.427/42.582/51.237	93.683/230.34/61.353	51.237	93.683	0.85803	0.0014952
49695	Dut	6.3691/17.236/20.318	5.3533/82.979/41.899	17.236	41.899	1.2342	0.0014967
61574	C1ql4	165.6/105.44/132.51	200.75/360.53/157.12	132.51	200.75	0.59561	0.0014994
16586	Spr	116.96/114.57/124.56	107.96/217.46/181.06	116.96	181.06	0.62616	0.0015004
49141	Mex3b	129.7/133.83/97.174	197.18/248.94/80.058	129.7	197.18	0.60058	0.0015054
76165	Lce3d	90.904/88.206/96.291	80.3/317.61/147.4	90.904	147.4	0.69125	0.0015066
16886	Stxbp3a	74.692/95.303/78.623	131.16/289/84.547	78.623	131.16	0.73099	0.0015076
19341	Slc30a1	97.852/67.929/78.623	131.16/140.21/68.835	78.623	131.16	0.73099	0.0015076
33794	Smdt1	140.12/115.58/117.49	183.8/181.7/92.777	117.49	181.7	0.62464	0.0015114
65943	Olfr1158	113.49/95.303/115.73	134.73/317.61/176.58	113.49	176.58	0.63327	0.0015133
5695	Foxn2	92.641/113.55/75.973	69.593/188.85/149.64	92.641	149.64	0.68589	0.0015142
57992	Fcrl1	76.429/63.873/66.255	115.1/114.45/70.331	66.255	114.45	0.7796	0.0015156
58289	Fam206a	90.904/83.137/96.291	86.545/147.36/154.13	90.904	147.36	0.69089	0.001516
33591	Disp1	82.219/118.62/89.224	82.977/310.46/145.15	89.224	145.15	0.69588	0.0015169
63258	Tnfaip8l3	99.01/107.47/100.71	91.899/233.2/160.12	100.71	160.12	0.66366	0.0015195
3792	Cycs	12.738/21.291/29.152	0/143.07/48.633	21.291	48.633	1.1548	0.0015212
20557	Eif2s3y	195.13/201.76/244.7	187.37/608.04/285.81	201.76	285.81	0.50034	0.0015251
27317	Cndp2	108.27/64.887/114.84	111.53/506.46/169.84	108.27	169.84	0.64471	0.0015269
39800	Poldip3	71.797/42.582/42.403	81.192/263.24/72.576	42.582	81.192	0.91526	0.001528
12546	Pax7	76.429/74.012/67.139	124.91/208.88/79.309	74.012	124.91	0.74721	0.0015281
75682	Gm6484	103.64/95.303/113.08	121.34/241.78/163.86	103.64	163.86	0.65574	0.0015323
16254	Snn	102.48/100.37/154.6	115.1/497.87/162.36	102.48	162.36	0.65864	0.0015326
33983	Cd209f	61.954/55.763/86.573	64.24/160.24/108.49	61.954	108.49	0.79843	0.0015384
4348	Dnm1	125.07/136.87/134.28	124.02/821.21/202.76	134.28	202.76	0.59097	0.0015436
76861	Zxdb	147.07/92.262/106.01	149.89/203.16/166.85	106.01	166.85	0.64944	0.0015461
77950	Scgb2b3	101.91/127.75/155.48	147.22/354.81/194.53	127.75	194.53	0.60287	0.0015467
42852	Fam204a	28.371/38.527/21.202	13.383/290.43/59.856	28.371	59.856	1.051	0.0015474
37784	Smg9	34.161/45.624/23.852	68.701/84.41/40.403	34.161	68.701	0.98719	0.0015479
8978	Kap	108.85/78.068/75.973	130.26/463.54/87.54	78.068	130.26	0.73132	0.0015501
8828	Itgb2	107.7/66.915/55.654	108.85/168.82/115.22	66.915	115.22	0.77509	0.0015553
29522	Dsn1	62.533/72.998/78.623	42.827/244.65/123.45	72.998	123.45	0.75004	0.0015556
43093	Mtif2	81.061/110.51/84.807	139.19/248.94/70.331	84.807	139.19	0.70819	0.0015565
71285	Slc7a6	132.01/100.37/145.76	199.86/268.97/193.04	132.01	199.86	0.5946	0.0015572
72559	C87414	4.6321/21.291/10.601	0.89222/34.336/29.928	10.601	29.928	1.4147	0.0015602
64789	Olfr727	133.75/106.46/143.99	131.16/283.27/202.01	133.75	202.01	0.59129	0.0015626
15883	Clpb	86.272/84.151/70.672	138.29/144.5/125.7	84.151	138.29	0.71004	0.0015636
25232	Plag1	143.59/118.62/118.38	182.91/470.69/125.7	118.62	182.91	0.62048	0.0015637
37114	Telo2	31.845/49.679/65.372	25.874/173.11/91.281	49.679	91.281	0.86463	0.0015638
62573	Oog4	74.113/76.04/52.121	124.91/134.48/38.907	74.113	124.91	0.74527	0.0015676
13069	Prkacb	65.428/78.068/89.224	57.102/147.36/130.19	78.068	130.19	0.73047	0.0015722
65809	Olfr970	27.792/18.25/38.87	58.887/217.46/26.935	27.792	58.887	1.0565	0.0015805
74229	Pnmal2	119.28/79.081/96.291	92.791/261.81/154.13	96.291	154.13	0.6731	0.001584
46183	Cpsf1	28.95/48.666/59.188	45.503/303.3/89.784	48.666	89.784	0.8702	0.0015843
1569	Bhmt	150.54/147.01/142.23	131.16/510.75/218.48	147.01	218.48	0.56836	0.0015843
37880	Urgcp	104.22/97.331/103.36	163.28/324.76/80.806	103.36	163.28	0.65458	0.0015854
10268	Magea8	83.377/109.5/86.573	101.71/154.51/141.41	86.573	141.41	0.70149	0.0015857
64952	Olfr1094	145.33/113.55/116.61	180.23/761.12/136.92	116.61	180.23	0.62381	0.0015911
22491	Wwc2	105.96/66.915/58.305	115.1/204.59/60.604	66.915	115.1	0.77352	0.0015948
12041	Nxn	55.006/71.984/72.439	71.378/679.57/121.96	71.984	121.96	0.75249	0.001595
73496	4932443I19Rik	82.219/88.206/64.488	135.62/200.29/58.36	82.219	135.62	0.71516	0.0015974
4831	Eif4g2	143.59/174.38/197	157.03/812.62/252.14	174.38	252.14	0.52944	0.001599
16548	Spn	85.114/68.943/69.789	81.192/137.34/118.96	69.789	118.96	0.76101	0.0016041
39133	Prss57	113.49/67.929/88.34	98.144/512.18/143.65	88.34	143.65	0.69523	0.0016074
54907	Kctd11	70.06/77.054/103.36	63.348/537.93/128.69	77.054	128.69	0.73254	0.0016143
24753	Pdcd10	122.17/129.77/156.36	109.74/206.02/196.78	129.77	196.78	0.59679	0.0016167
54972	Proca1	53.269/37.513/52.121	94.575/605.17/93.525	52.121	94.575	0.84736	0.0016196
48857	Chrnb4	148.23/126.73/135.16	149/885.59/203.51	135.16	203.51	0.58687	0.0016231
66430	Olfr473	112.91/68.943/94.524	151.68/323.33/99.511	94.524	151.68	0.67655	0.0016247
55100	Tmem106a	69.481/59.818/58.305	105.28/293.29/88.288	59.818	105.28	0.80533	0.0016255
77793	Vmn2r51	144.17/140.93/185.51	157.92/469.26/214.73	144.17	214.73	0.57148	0.0016299
56047	Mroh2b	36.477/31.43/30.919	33.904/64.38/65.842	31.43	64.38	1.0115	0.0016316
26986	Gpr85	124.49/118.62/130.74	125.8/208.88/190.04	124.49	190.04	0.60637	0.0016323
77230	Gm2030	121.59/76.04/85.69	140.08/383.42/84.547	85.69	140.08	0.70256	0.0016328
56845	Myof	85.114/95.303/106.01	99.036/586.58/152.63	95.303	152.63	0.67383	0.0016405
76484	Cyp2j8	125.07/107.47/90.99	140.08/268.97/168.35	107.47	168.35	0.64268	0.0016414
48582	Unc5a	89.746/97.331/99.824	155.25/256.09/68.086	97.331	155.25	0.6681	0.0016462
62901	Ggn	112.33/96.317/129.86	91.007/174.54/181.81	112.33	174.54	0.63132	0.0016469
13950	Ptcra	112.33/103.41/91.874	96.36/982.87/163.11	103.41	163.11	0.65233	0.0016473
[truncated: 76,634 more rows]
